# Supplementary material
Source: MDPI journal article supplement (https://www.mdpi.com/2073-4344/14/1/90)
Supplement: s1 [file s1]

# Supplementary Information for

## Organocatalysts for the Synthesis of Cyclic Carbonates Under the Conditions of Ambient Temperature and Atmospheric CO<sub>2</sub> Pressure

Yeongju Seong, † Sanghun Lee, † Seungyeon Cho, Yoseph Kim\* and Youngjo Kim\*

Department of Chemistry, Chungbuk National University, Cheongju, Chungbuk 28644, Republic of Korea

† These authors contributed equally to this work

\* Correspondence: armadajo@gmail.com, ykim@chungbuk.ac.kr; Tel.: +82-43-261-3395

### Table of Contents

|                                                                                             |       |   |
|---------------------------------------------------------------------------------------------|-------|---|
| <b>1. Lists of Known Compounds</b>                                                          | ..... | 2 |
| <b>2. Crystallographic Data</b>                                                             | ..... | 4 |
| <b>3. <sup>1</sup>H-, <sup>13</sup>C-NMR and HRMS Spectra for the Synthesized Compounds</b> | ..... | 6 |

## 1. Lists of Known Compounds

**Table S1.** List of known compounds

|                                                                                     |                                                              |
|-------------------------------------------------------------------------------------|--------------------------------------------------------------|
|                                                                                     | 2-(1H-1,2,4-triazol-3-yl)phenol ( <b>CAT-1</b> )<br>[28]     |
|                                                                                     | 2-(1H-pyrazol-3-yl)phenol ( <b>CAT-2</b> )<br>[30]           |
|                                                                                     | 2-(1H-tetrazol-5-yl)pyridine ( <b>CAT-3</b> )<br>[30]        |
|                                                                                     | 2-(2-methyl-2H-tetrazol-5-yl)phenol ( <b>CAT-4</b> )<br>[31] |
|                                                                                     | 2-(1-phenyl-1H-imidazol-5-yl)phenol ( <b>CAT-1</b> )<br>[32] |
| 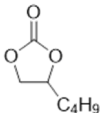 | 4-butyl-1,3-dioxolan-2-one ( <b>2a</b> )<br>[33]             |
|  | 4-methyl-1,3-dioxolan-2-one ( <b>2b</b> )<br>[34]            |
|  | 4-ethyl-1,3-dioxolan-2-one ( <b>2c</b> )<br>[35]             |
|  | 4-phenyl-1,3-dioxolan-2-one ( <b>2d</b> )<br>[36]            |

|                                                                                     |                                                                                                   |
|-------------------------------------------------------------------------------------|---------------------------------------------------------------------------------------------------|
| 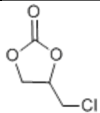   | 4-(chloromethyl)-1,3-dioxolan-2-one ( <b>2e</b> )<br>[34]                                         |
|    | 4-(methoxymethyl)-1,3-dioxolan-2-one ( <b>2f</b> )<br>[37]                                        |
|    | 4-[(1,1-dimethylethoxy)methyl]-1,3-dioxolan-2-one ( <b>2g</b> )<br>[34]                           |
|    | 4-(phenoxymethyl)-1,3-dioxolan-2-one ( <b>2h</b> )<br>[34]                                        |
|    | <i>trans</i> -4,5-dimethyl-1,3-dioxolan-2-one ( <i>trans</i> - <b>2i</b> )<br>[38]                |
|    | tetrahydro-furo[3,4- <i>d</i> ]-1,3-dioxol-2-one ( <i>cis</i> - <b>2j</b> )<br>[39]               |
|   | tetrahydro-4 <i>H</i> -cyclopenta[ <i>d</i> ][1,3]dioxol-2-one ( <i>cis</i> - <b>2k</b> )<br>[40] |
|  | hexahydrobenzo[ <i>d</i> ][1,3]dioxol-2-one ( <i>cis</i> - <b>2l</b> )<br>[41]                    |

## 2. Crystallographic Data

**Table S2.** Crystallographic data for **CAT-6**

| Compound                                                         | CAT-6                                            |
|------------------------------------------------------------------|--------------------------------------------------|
| Chemical formula                                                 | C <sub>14</sub> H <sub>12</sub> N <sub>4</sub> O |
| Crystal system                                                   | Monoclinic                                       |
| Space group                                                      | P 21                                             |
| <i>a</i> (Å)                                                     | 8.7410(18) Å                                     |
| <i>b</i> (Å)                                                     | 12.941(3) Å                                      |
| <i>c</i> (Å)                                                     | 11.695(2) Å                                      |
| $\alpha$ (deg)                                                   | 90°                                              |
| $\beta$ (deg)                                                    | 107.85(3)°                                       |
| $\gamma$ (deg)                                                   | 90°                                              |
| <i>V</i> (Å <sup>3</sup> )                                       | 1259.2(5) Å <sup>3</sup>                         |
| <i>Z</i>                                                         | 4                                                |
| <i>d</i> <sub>calcd</sub> (g/cm <sup>3</sup> )                   | 1.331 Mg/m <sup>3</sup>                          |
| <i>F</i> (000)                                                   | 528                                              |
| Reflections collected                                            | 12436                                            |
| # of independent reflections                                     | 5208 [R(int) = 0.0359]                           |
| # of parameters                                                  | 345                                              |
| <i>R</i> <sub>1</sub> ( <i>I</i> > 2σ( <i>I</i> )) <sup>a</sup>  | 0.0491                                           |
| <i>wR</i> <sub>2</sub> ( <i>I</i> > 2σ( <i>I</i> )) <sup>b</sup> | 0.1119                                           |
| GOF( <i>I</i> > 2σ( <i>I</i> ))                                  | 1.010                                            |

$$^a R_1 = \frac{\sum ||F_o| - |F_c||}{\sum |F_o|}, \quad ^b wR_2 = \left\{ \frac{\sum [w(F_o^2 - F_c^2)^2]}{\sum [w(F_o^2)^2]} \right\}^{1/2}.$$

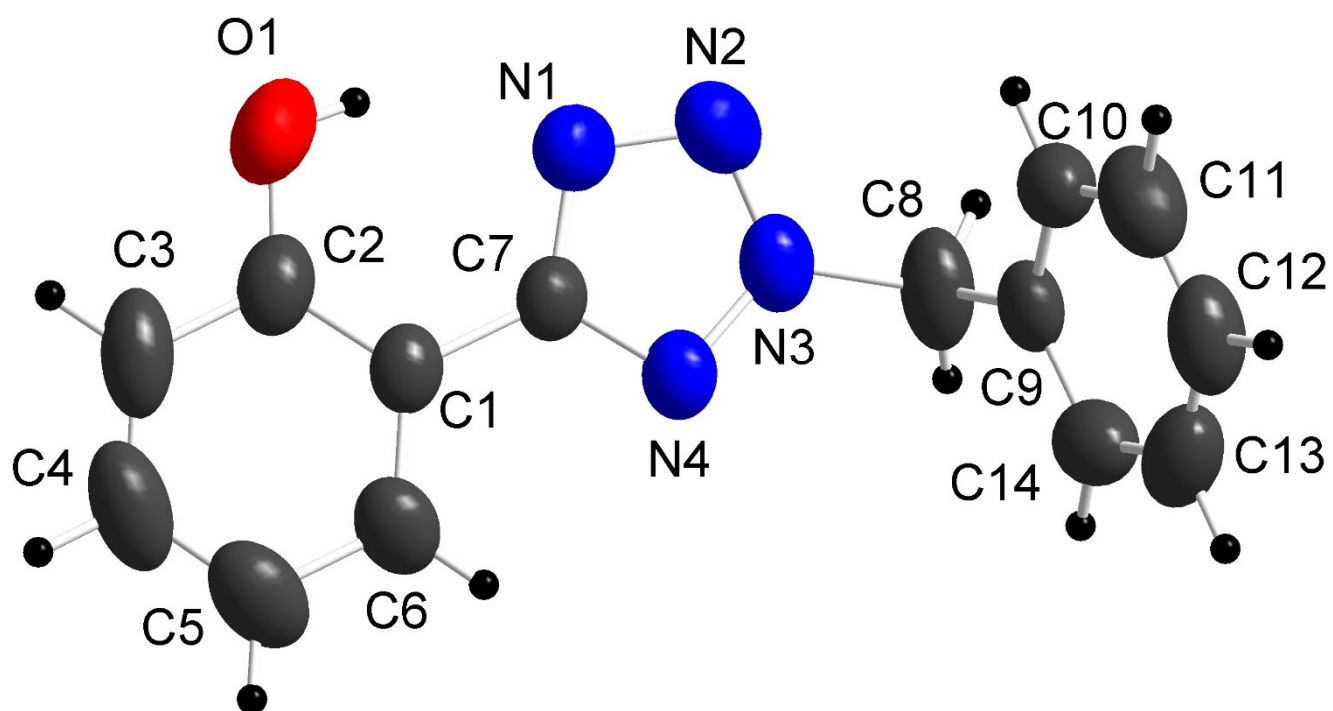

**Figure S1.** X-ray structure for 2-(2-benzyl-2*H*-tetrazol-5-yl)phenol(CAT-6).

### 3. $^1\text{H}$ -, $^{13}\text{C}$ -NMR and HRMS Spectra for the Synthesized Catalysts

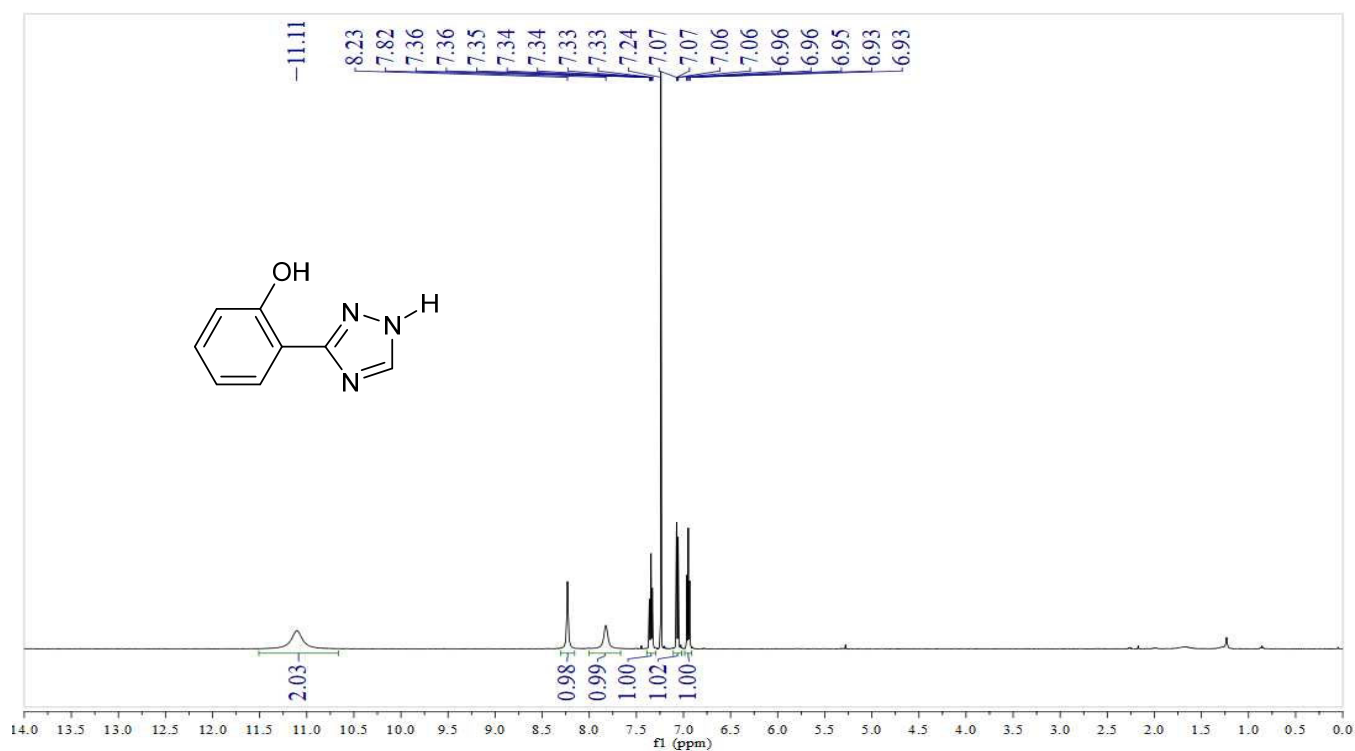

**Figure S2.**  $^1\text{H}$  NMR spectrum of 2-(1H-1,2,4-triazol-3-yl)phenol (CAT-1) in CDCl<sub>3</sub>.

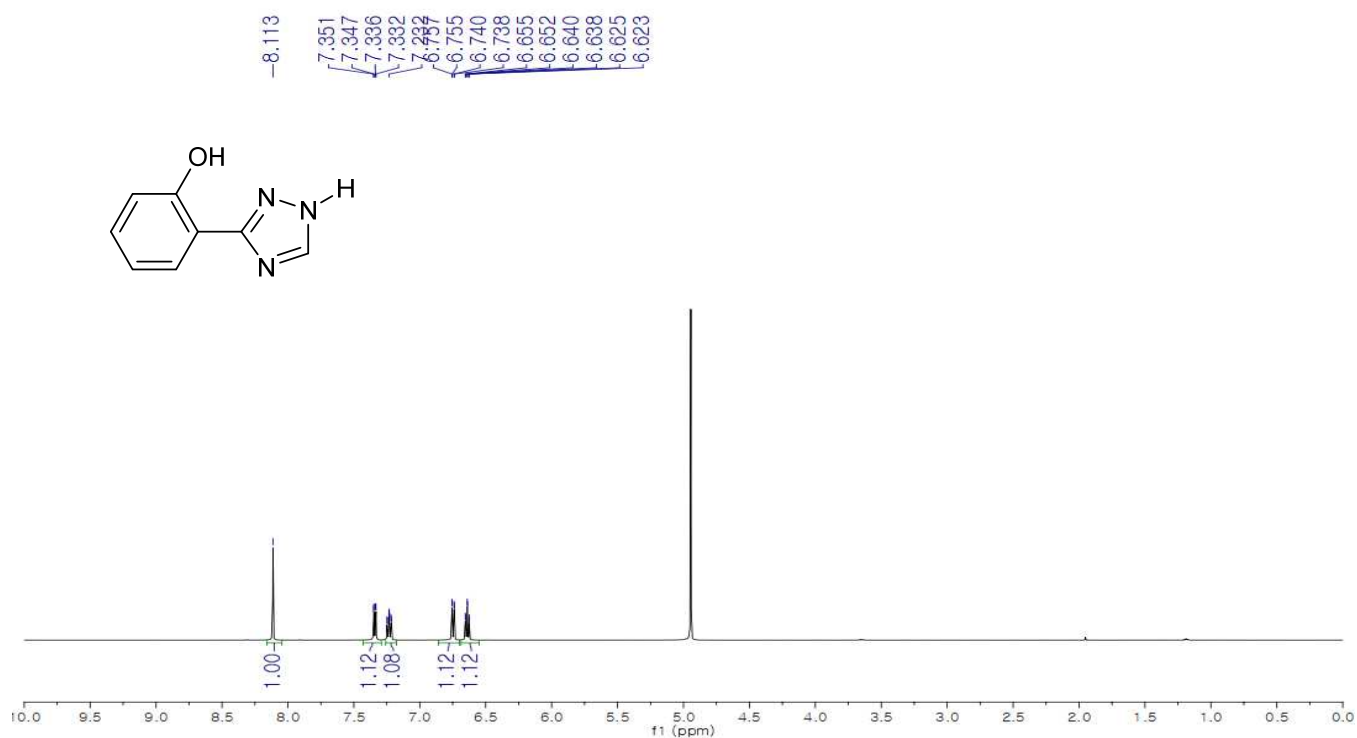

**Figure S3.**  $^1\text{H}$  NMR spectrum of 2-(1H-1,2,4-triazol-3-yl)phenol (CAT-1) in D<sub>2</sub>O.

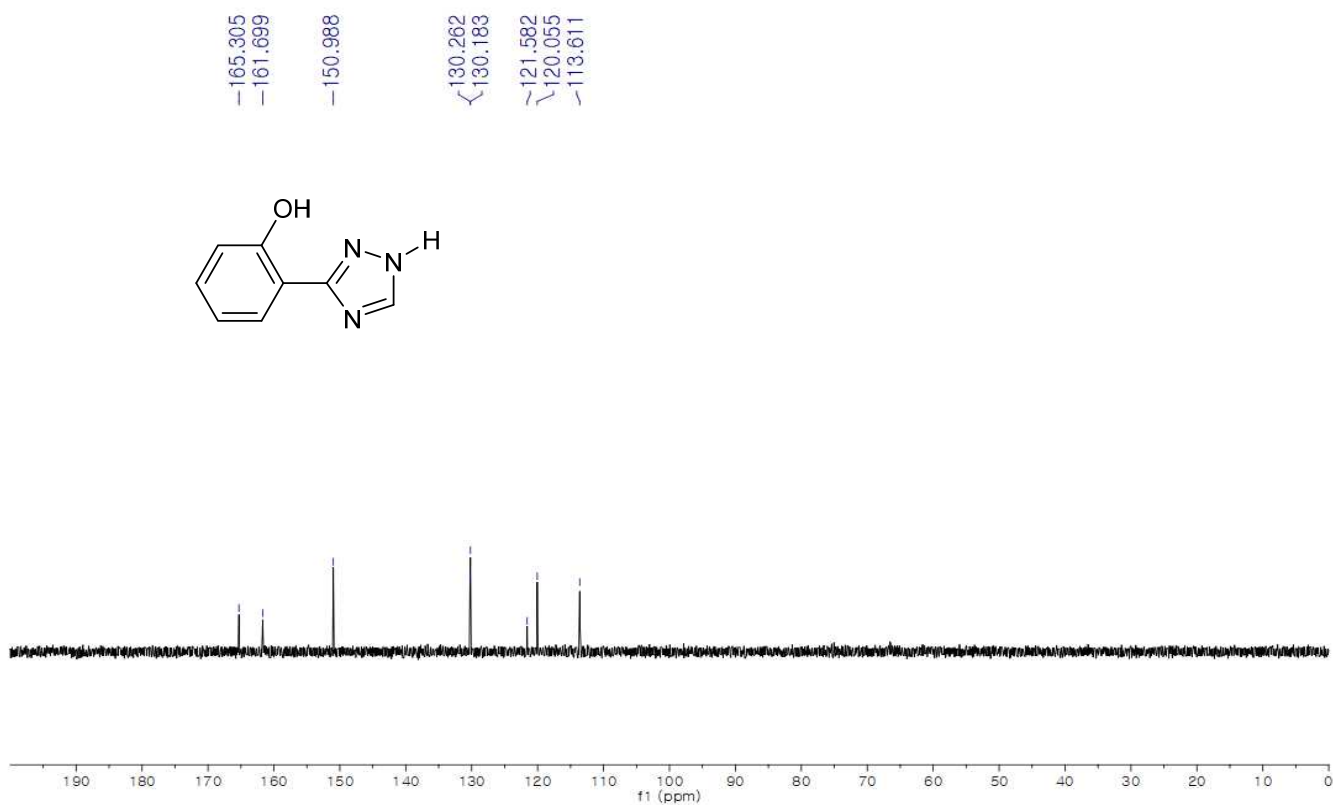

**Figure S4.** <sup>13</sup>C NMR spectrum of 2-(1H-1,2,4-triazol-3-yl)phenol (CAT-1) in D<sub>2</sub>O.

**+MS, 0.6min #34**

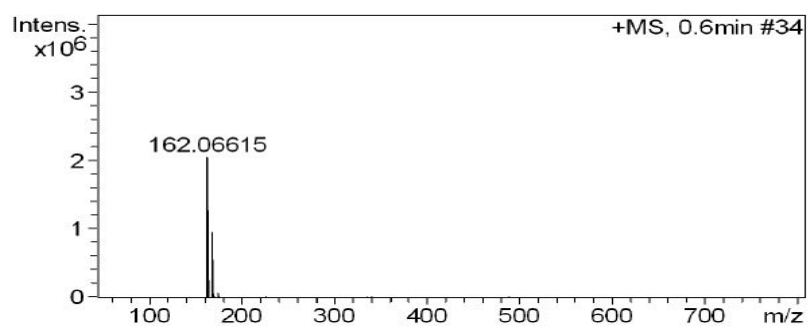

**C<sub>8</sub>H<sub>7</sub>N<sub>3</sub>O, M+nH ,162.07**

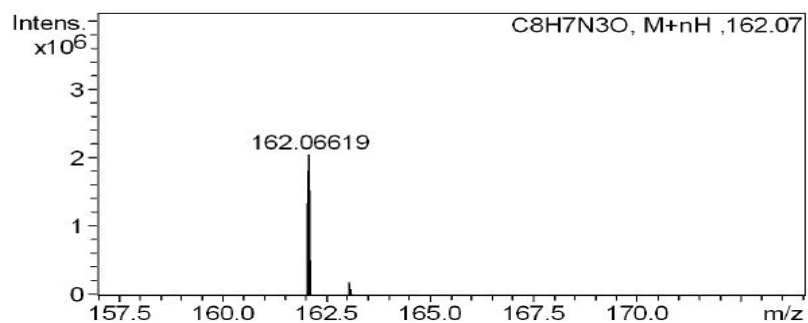

**Figure S5.** HR-MS spectrum of 2-(1H-1,2,4-triazol-3-yl)phenol (CAT-1).

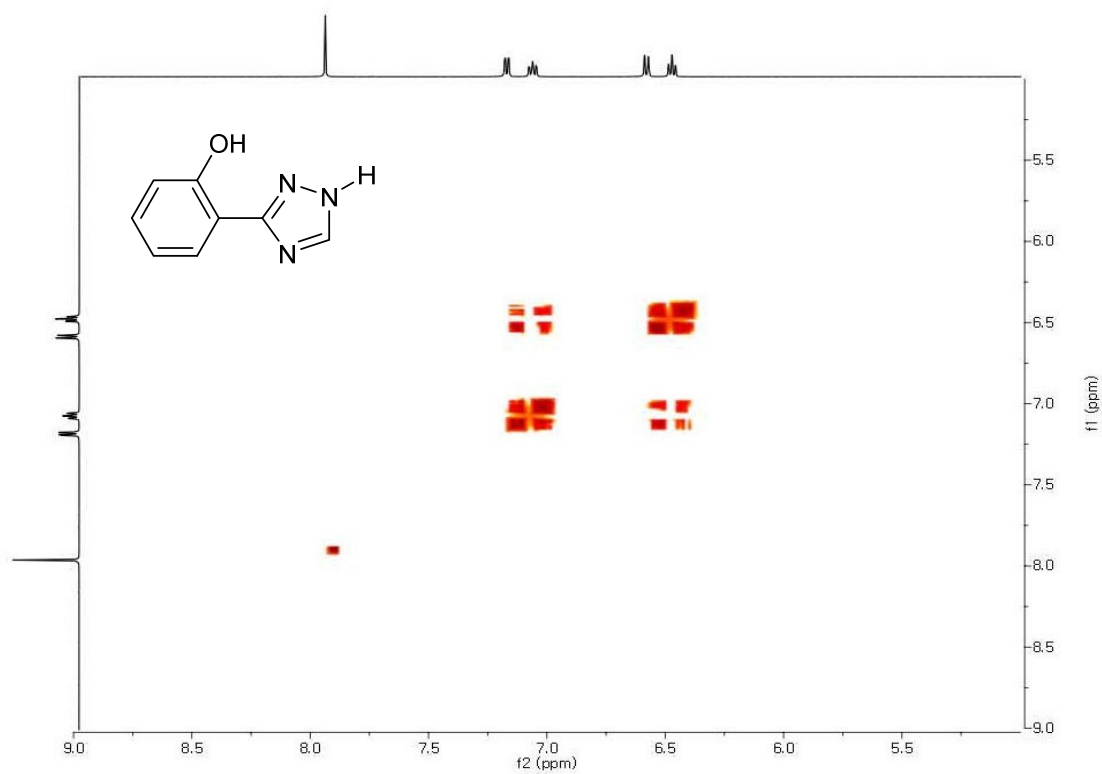

**Figure S6.** COSY spectrum of 2-(1*H*-1,2,4-triazol-3-yl)phenol (CAT-1) in D<sub>2</sub>O.

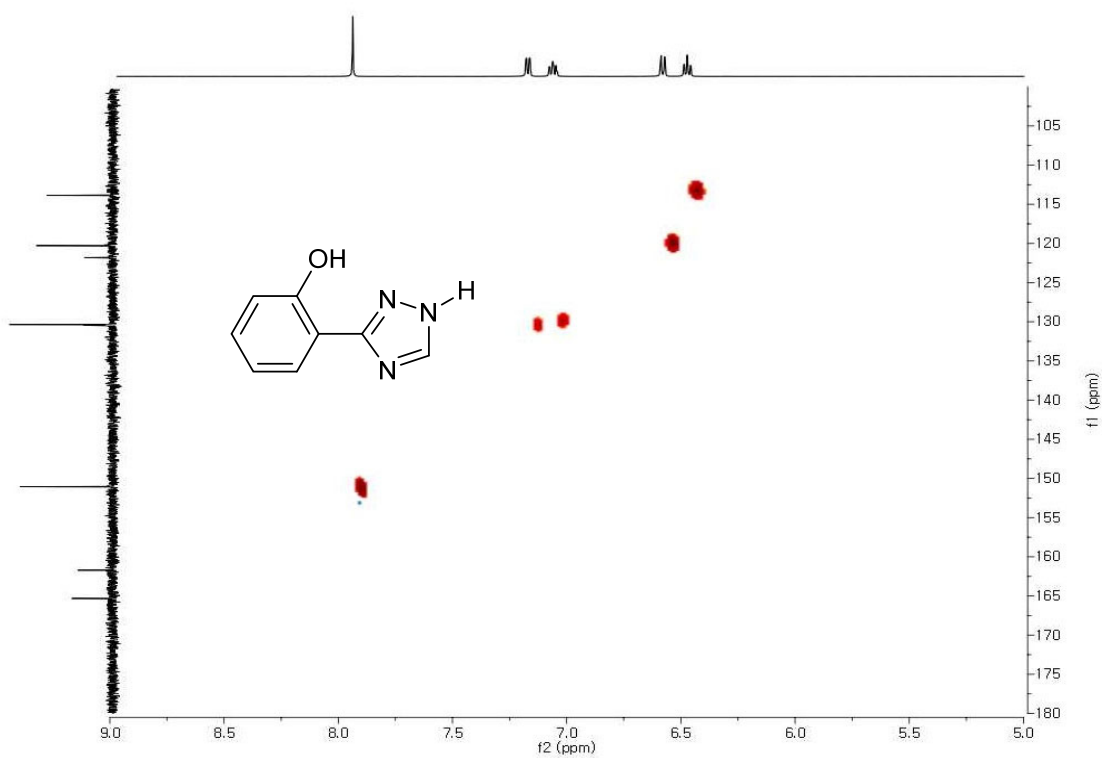

**Figure S7.** HSQC spectrum of 2-(1*H*-1,2,4-triazol-3-yl)phenol (CAT-1) in D<sub>2</sub>O.



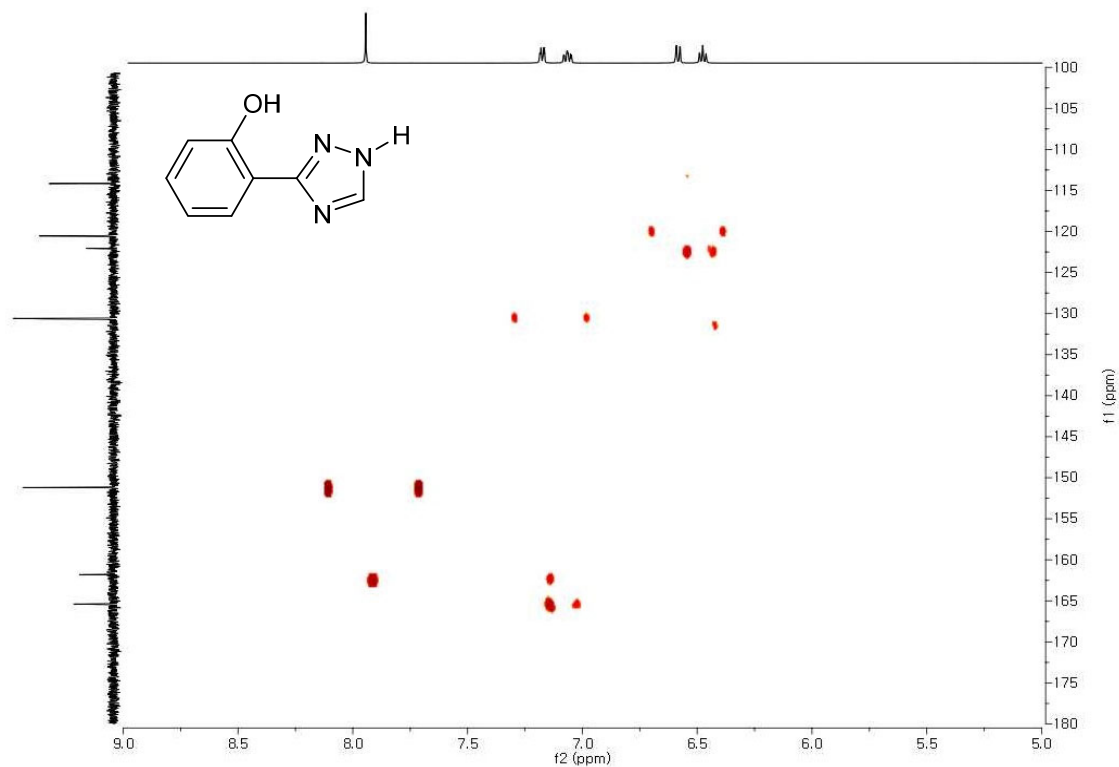

**Figure S8.** HMBC spectrum of 2-(1H-1,2,4-triazol-3-yl)phenol (CAT-1) in D<sub>2</sub>O.

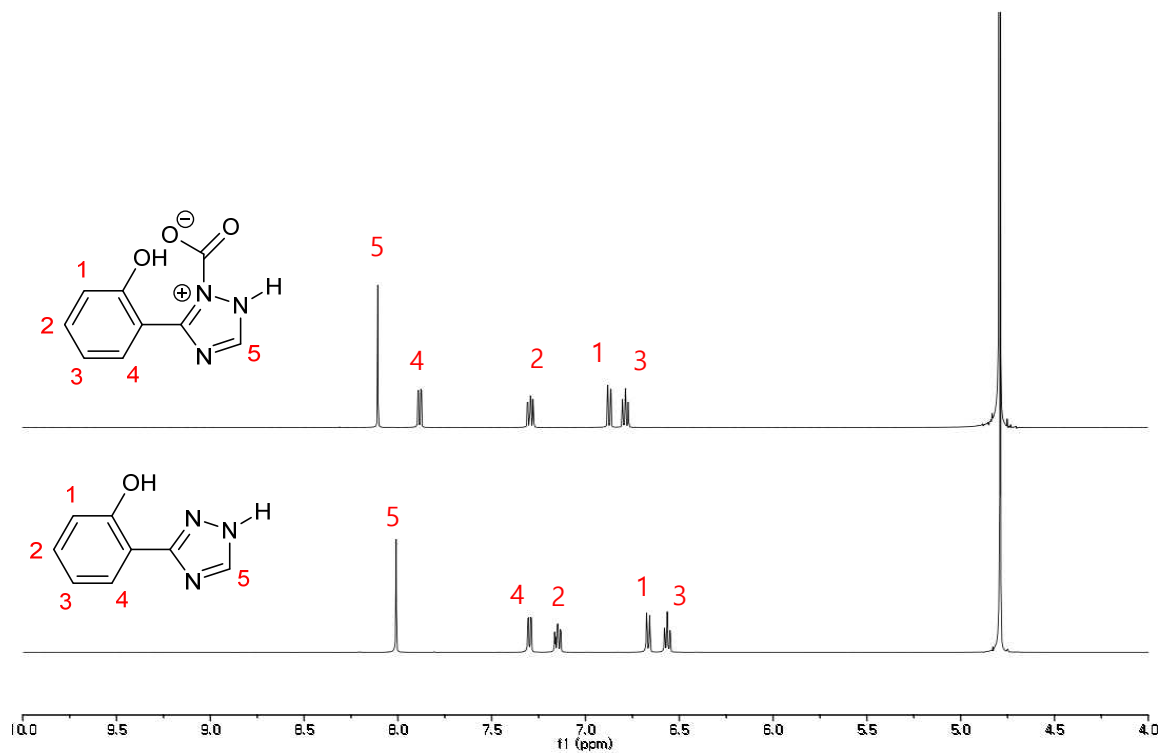

**Figure S9.**  $^1\text{H}$  NMR spectrum of CAT-1 before (bottom) and after (top) bubbling CO<sub>2</sub> in D<sub>2</sub>O.

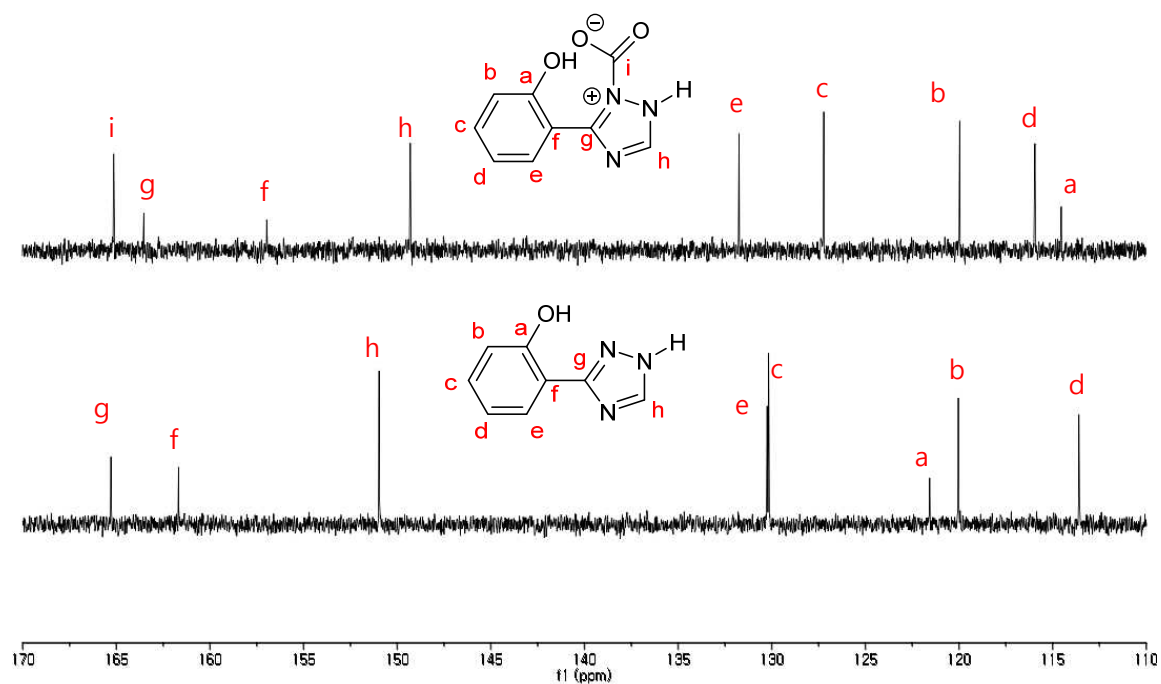

**Figure S10.**  $^{13}\text{C}$  NMR spectrum of CAT-1 before (bottom) and after (top) bubbling  $\text{CO}_2$  in  $\text{D}_2\text{O}$ .

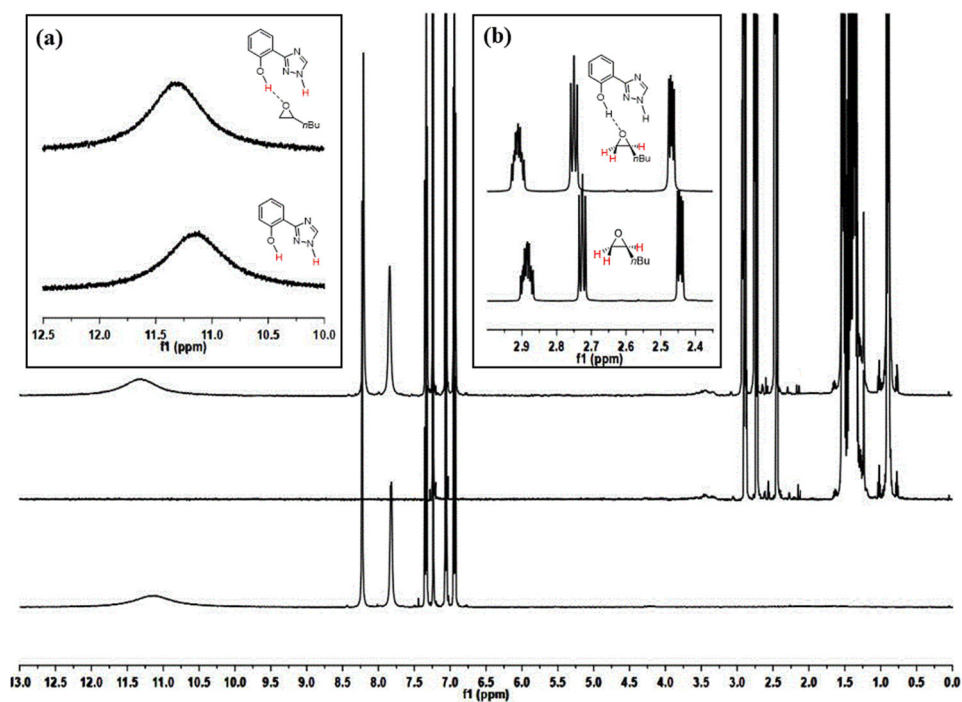

**Figure S11.**  $^1\text{H}$  NMR spectrum of **CAT-1** (bottom), **1a** (middle), and a mixture of **CAT-1** and **1a** (top) in  $\text{CDCl}_3$ . (a) O-H and N-H peaks in the  $^1\text{H}$  NMR spectrum of **CAT-1** before (bottom) and after (top) adding **1a** in  $\text{CDCl}_3$ ; (b) The methine proton and methylene protons on the three-membered ring carbons in the  $^1\text{H}$  NMR spectrum of **1a** before (bottom) and after (top) adding **CAT-1** in  $\text{CDCl}_3$ .

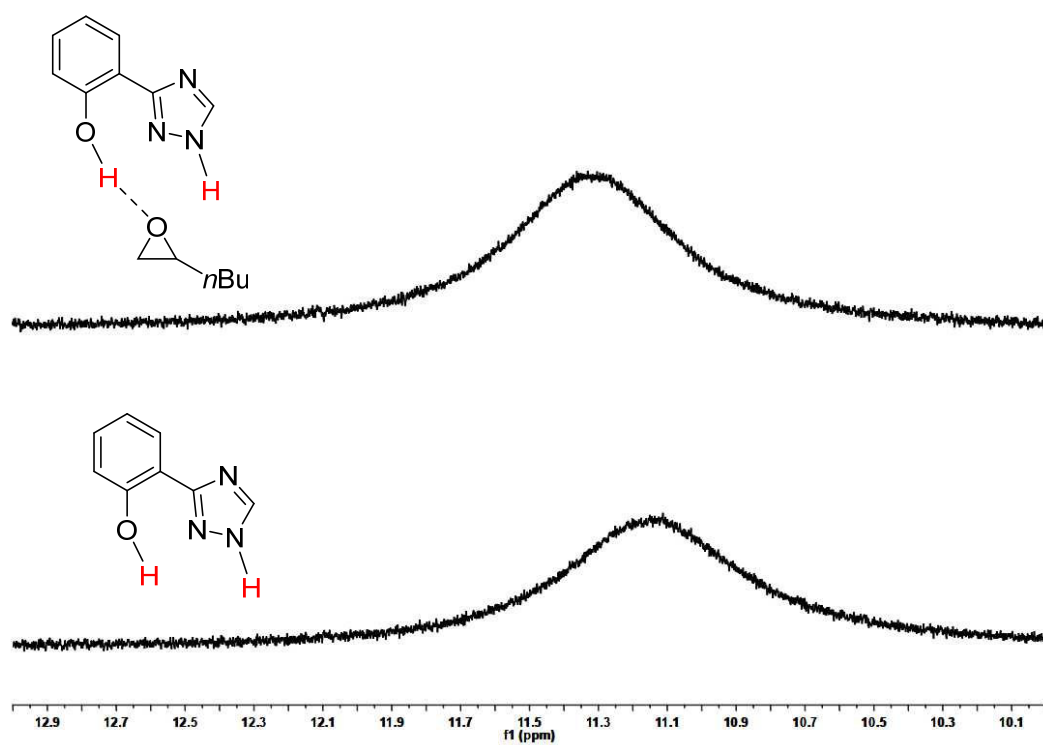

**Figure S12.** O–H and N–H peaks in the  $^1\text{H}$  NMR spectrum of CAT–1 before (bottom) and after (top) adding **1a** in  $\text{CDCl}_3$ .

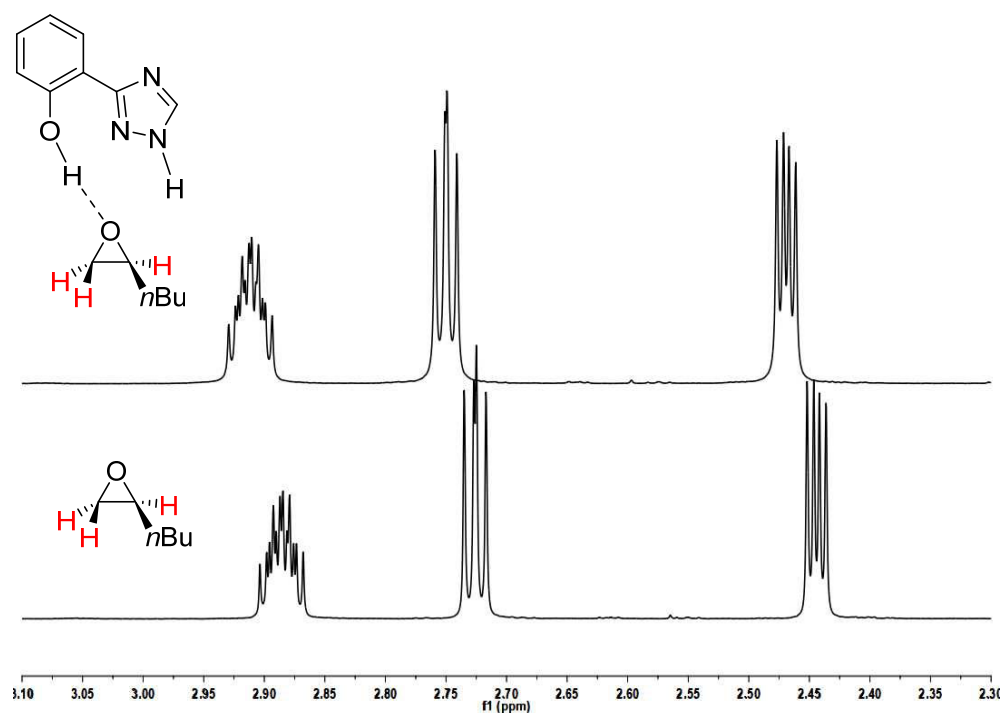

**Figure S13.** The methine proton and methylene protons on the three-membered ring carbons in the  $^1\text{H}$  NMR spectrum of **1a** before (bottom) and after (top) adding **CAT-1** in  $\text{CDCl}_3$ .

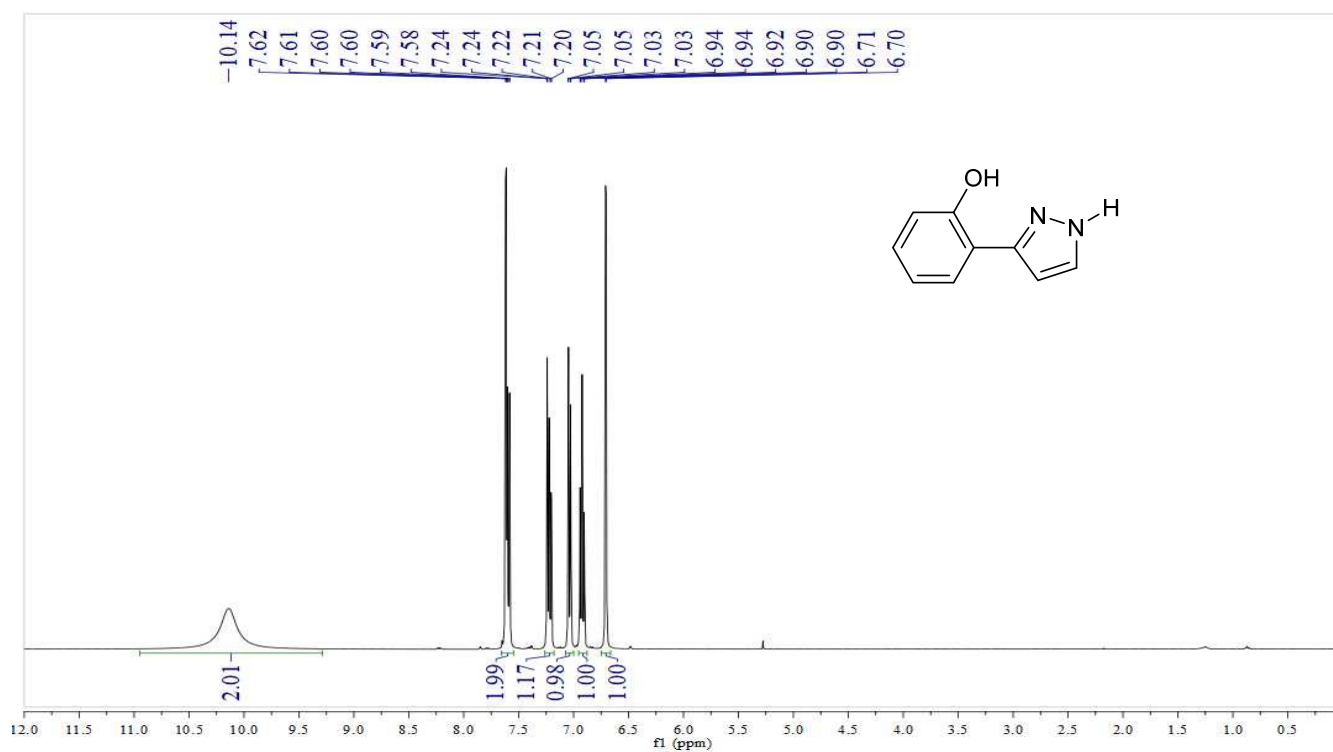

**Figure S14.** <sup>1</sup>H NMR spectrum of 2-(1*H*-pyrazol-3-yl)phenol (**CAT-2**) in CDCl<sub>3</sub>.

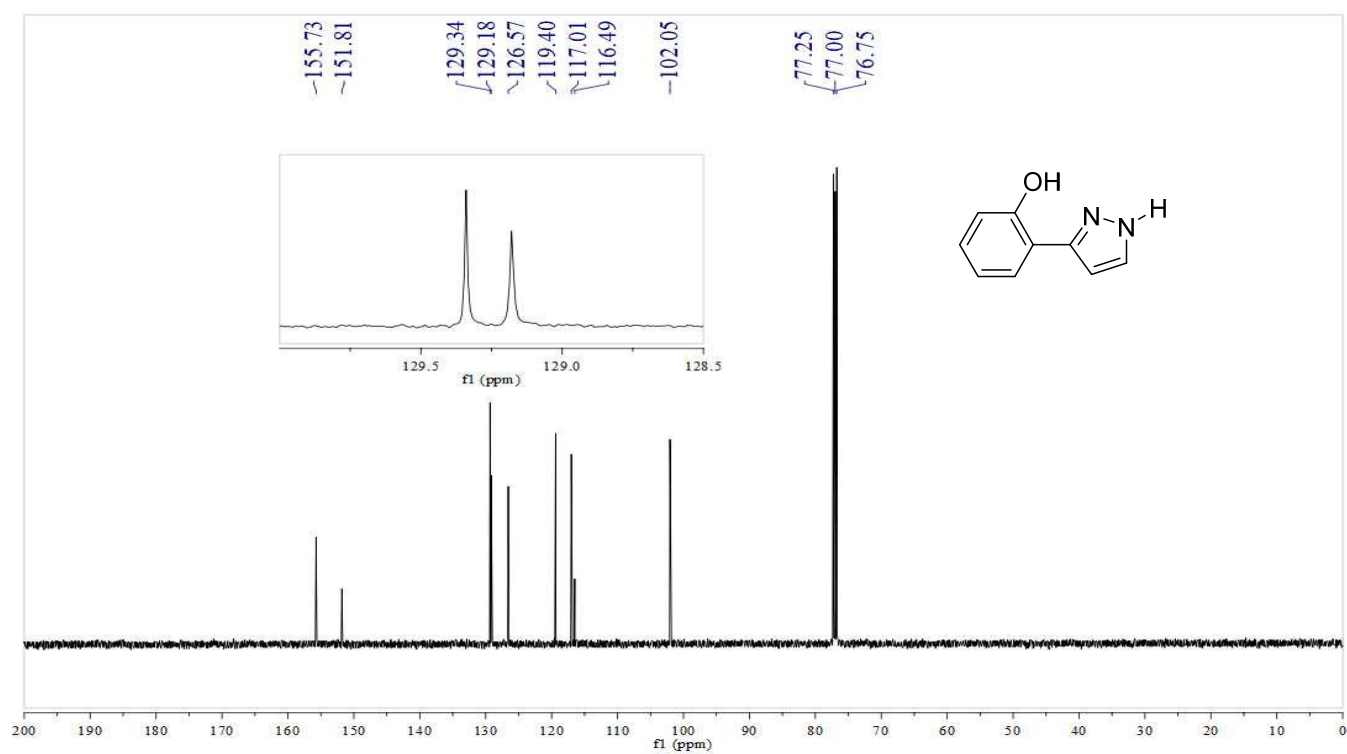

**Figure S15.** <sup>13</sup>C NMR spectrum of 2-(1*H*-pyrazol-3-yl)phenol (**CAT-2**) in CDCl<sub>3</sub>.

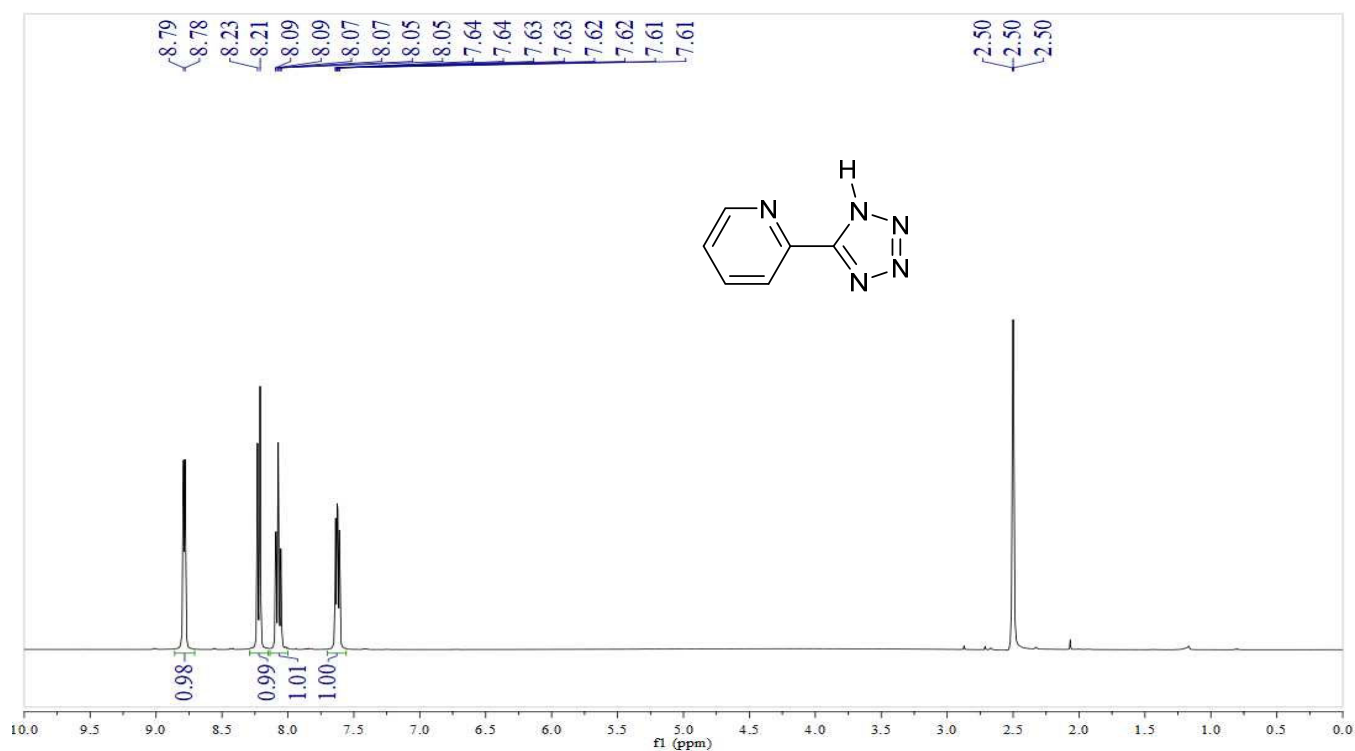

**Figure S16.** <sup>1</sup>H NMR spectrum of 2-(1*H*-tetrazol-5-yl)pyridine (CAT-3) in DMSO-*d*<sub>6</sub>.

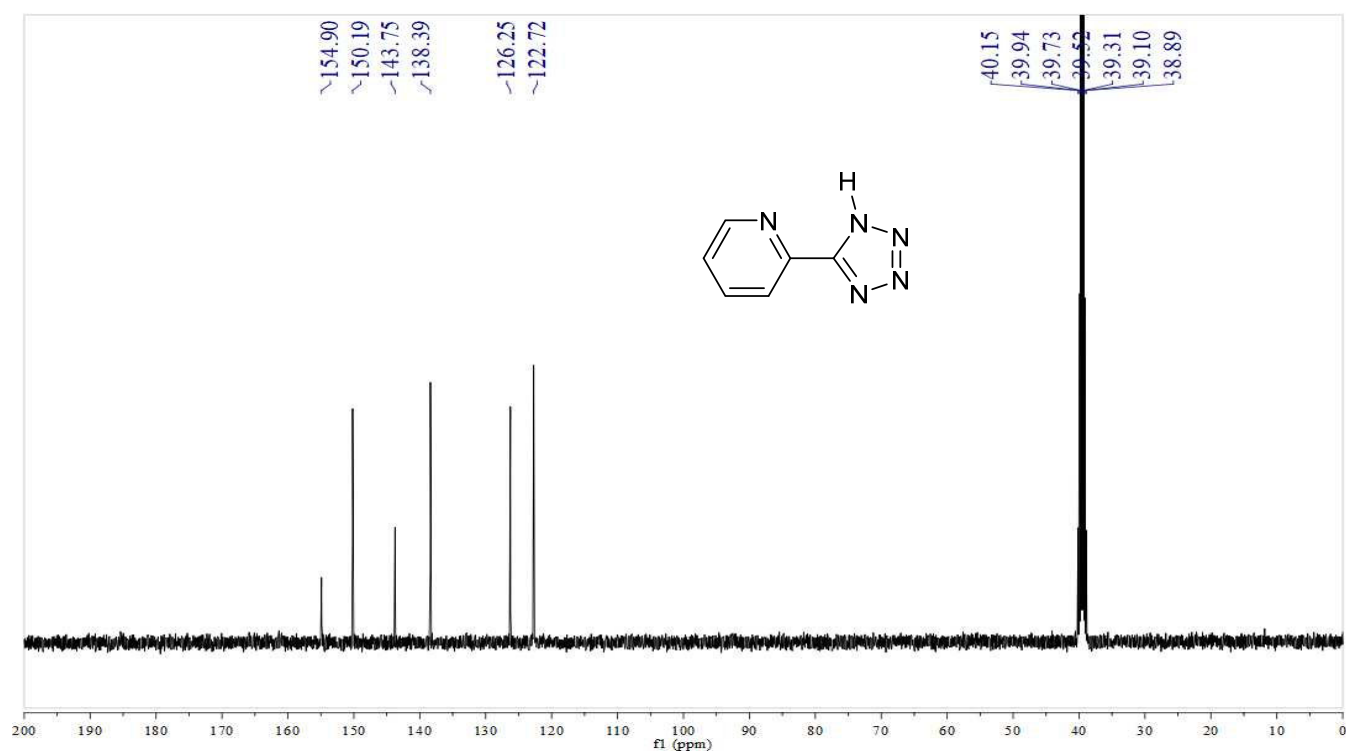

**Figure S17.** <sup>13</sup>C NMR spectrum of 2-(1*H*-tetrazol-5-yl)pyridine (CAT-3) in CDCl<sub>3</sub>.

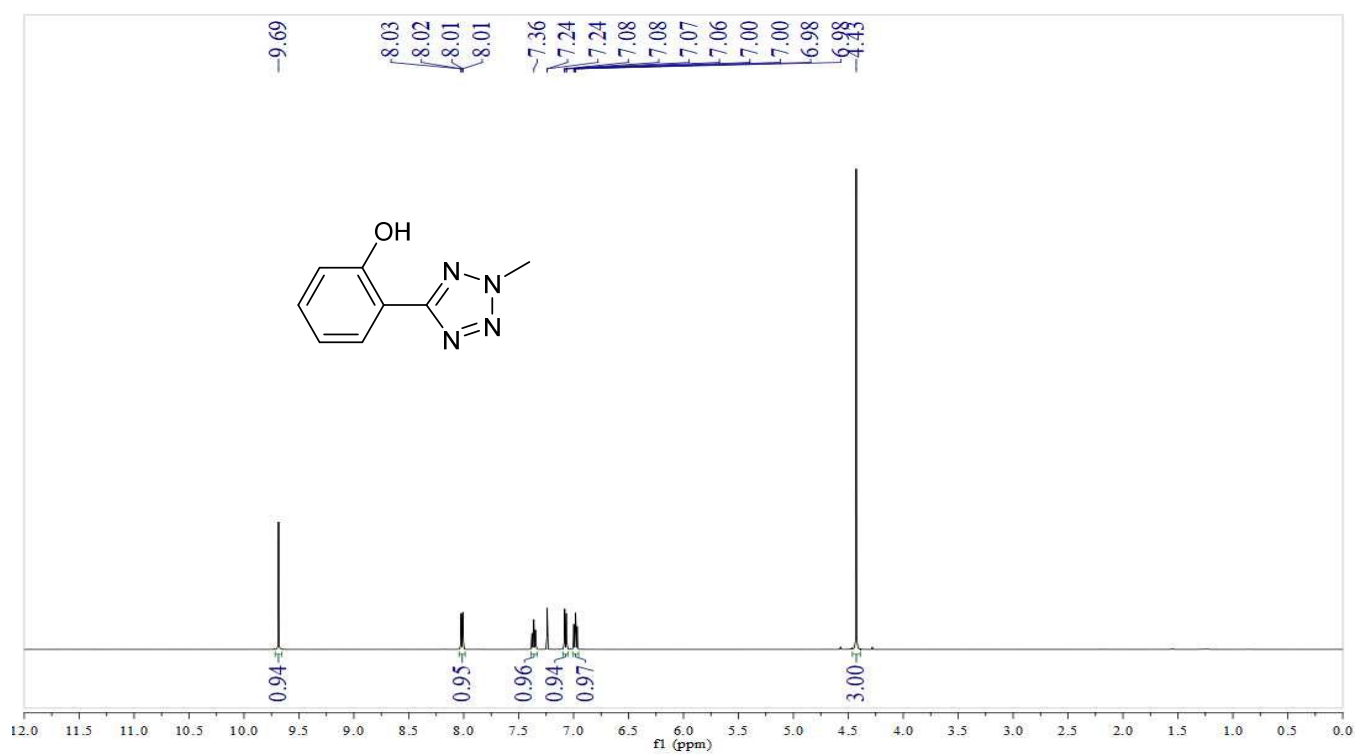

**Figure S18.** <sup>1</sup>H NMR spectrum of 2-(2-methyl-2H-tetrazol-5-yl)phenol (CAT-4) in CDCl<sub>3</sub>.

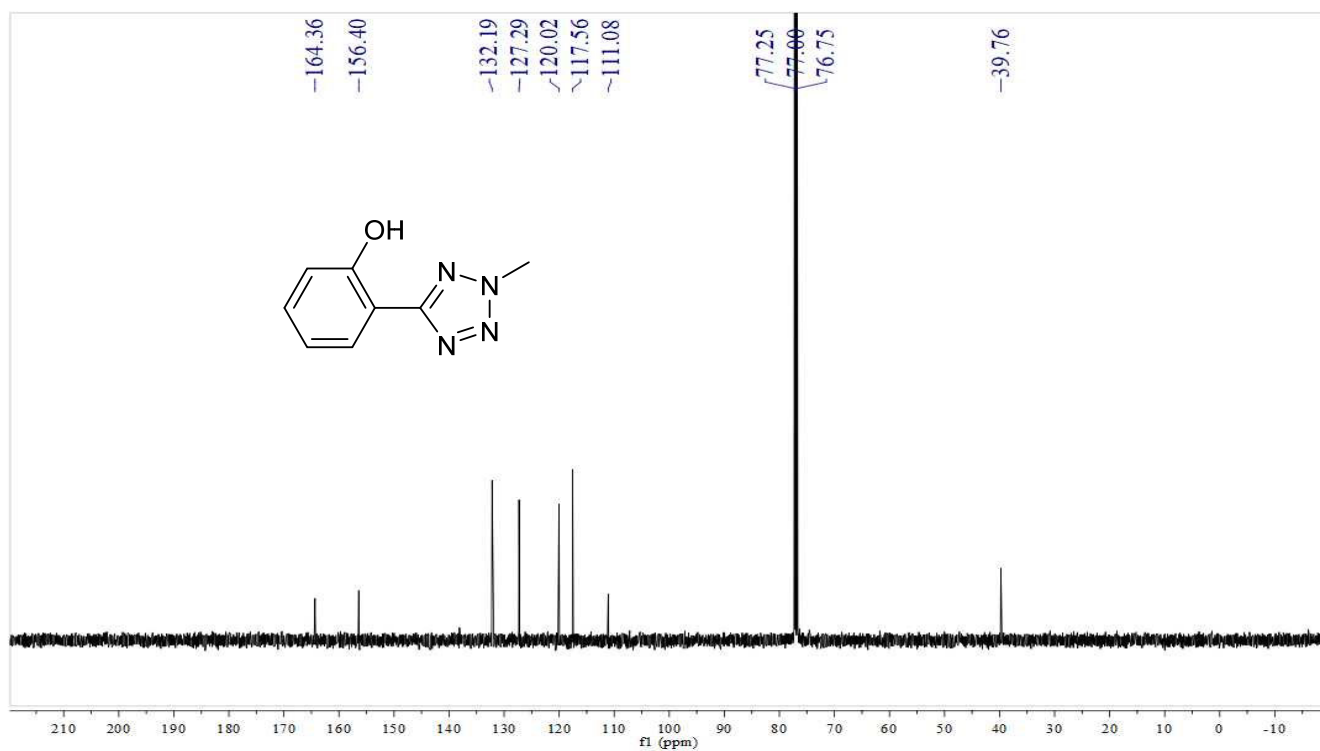

**Figure S19.** <sup>13</sup>C NMR spectrum of 2-(2-methyl-2H-tetrazol-5-yl)phenol (CAT-4) in CDCl<sub>3</sub>.



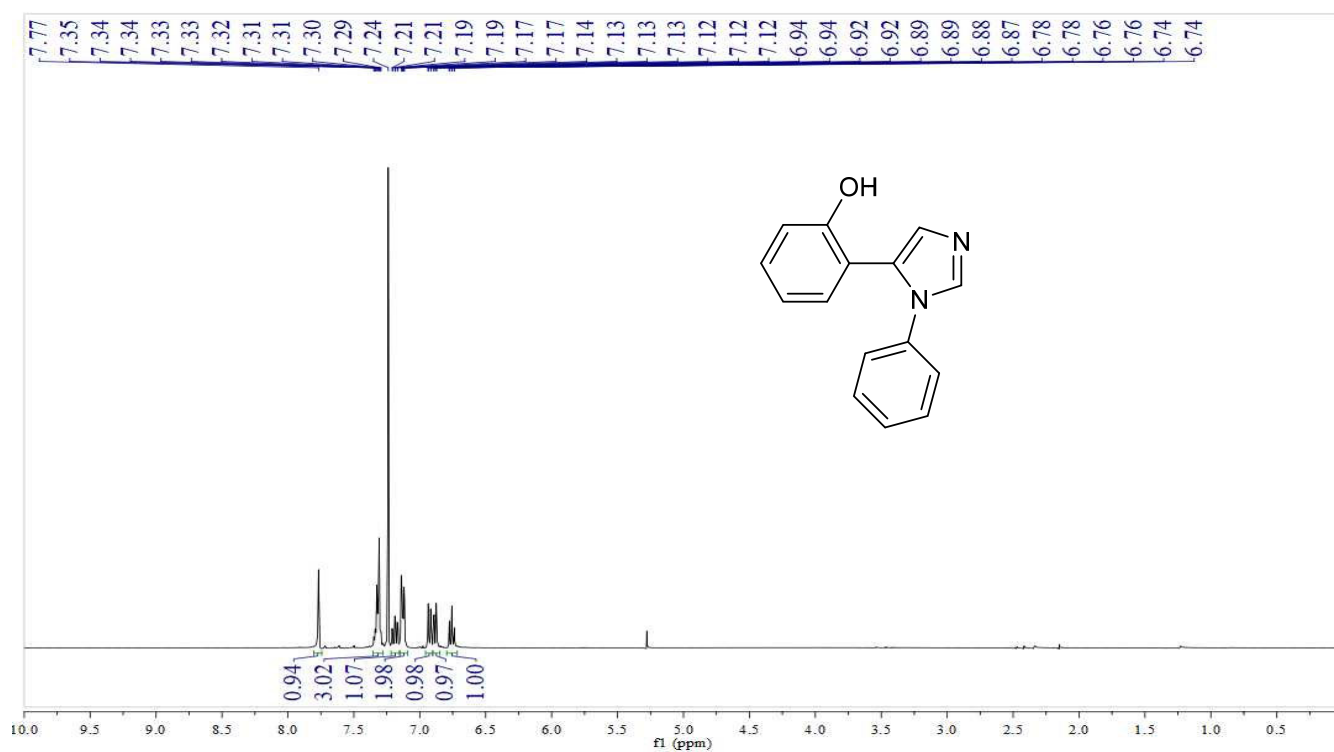

**Figure S20.** <sup>1</sup>H NMR spectrum of 2-(1-phenyl-1*H*-imidazol-5-yl)phenol (CAT-5) in CDCl<sub>3</sub>.

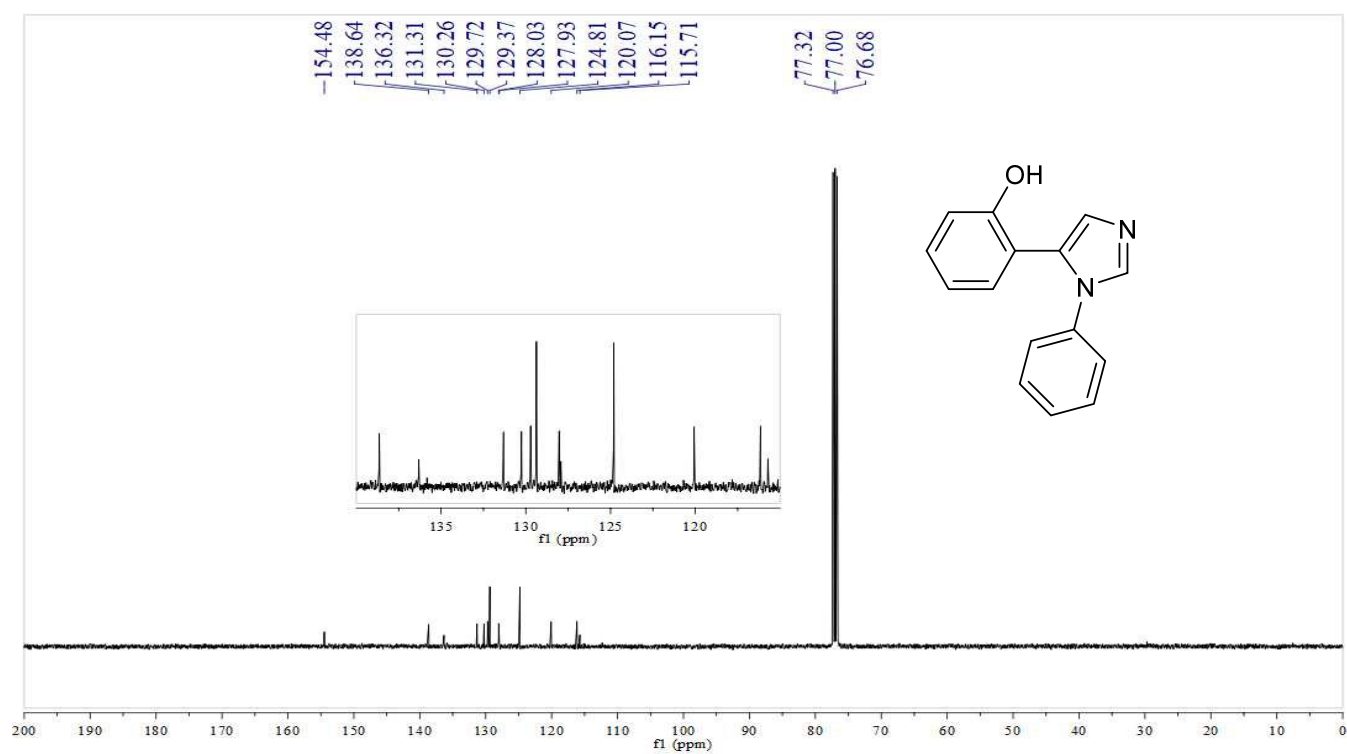

**Figure S21.** <sup>13</sup>C NMR spectrum of 2-(1-phenyl-1*H*-imidazol-5-yl)phenol (CAT-5) in CDCl<sub>3</sub>.

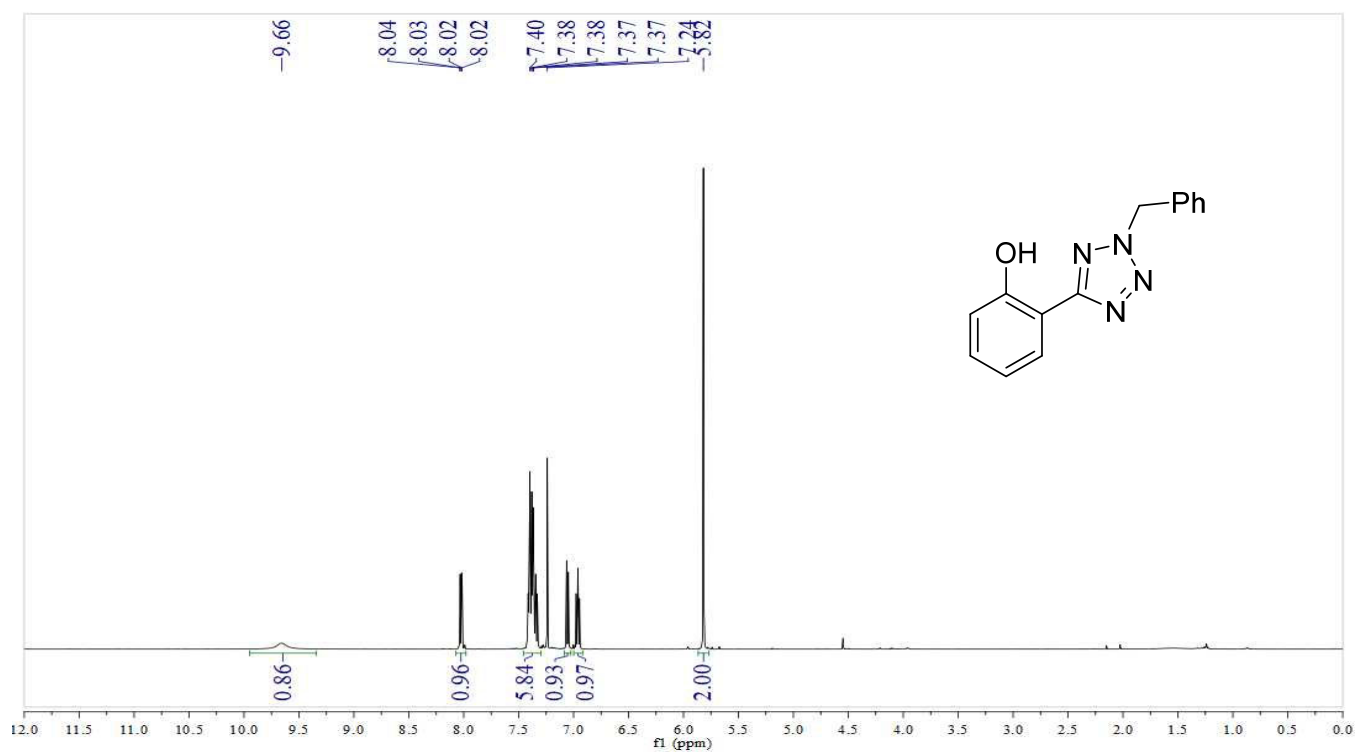

**Figure S22.** <sup>1</sup>H NMR spectrum of 2-(2-benzyl-2*H*-tetrazol-5-yl)phenol (**CAT-6**) in CDCl<sub>3</sub>.

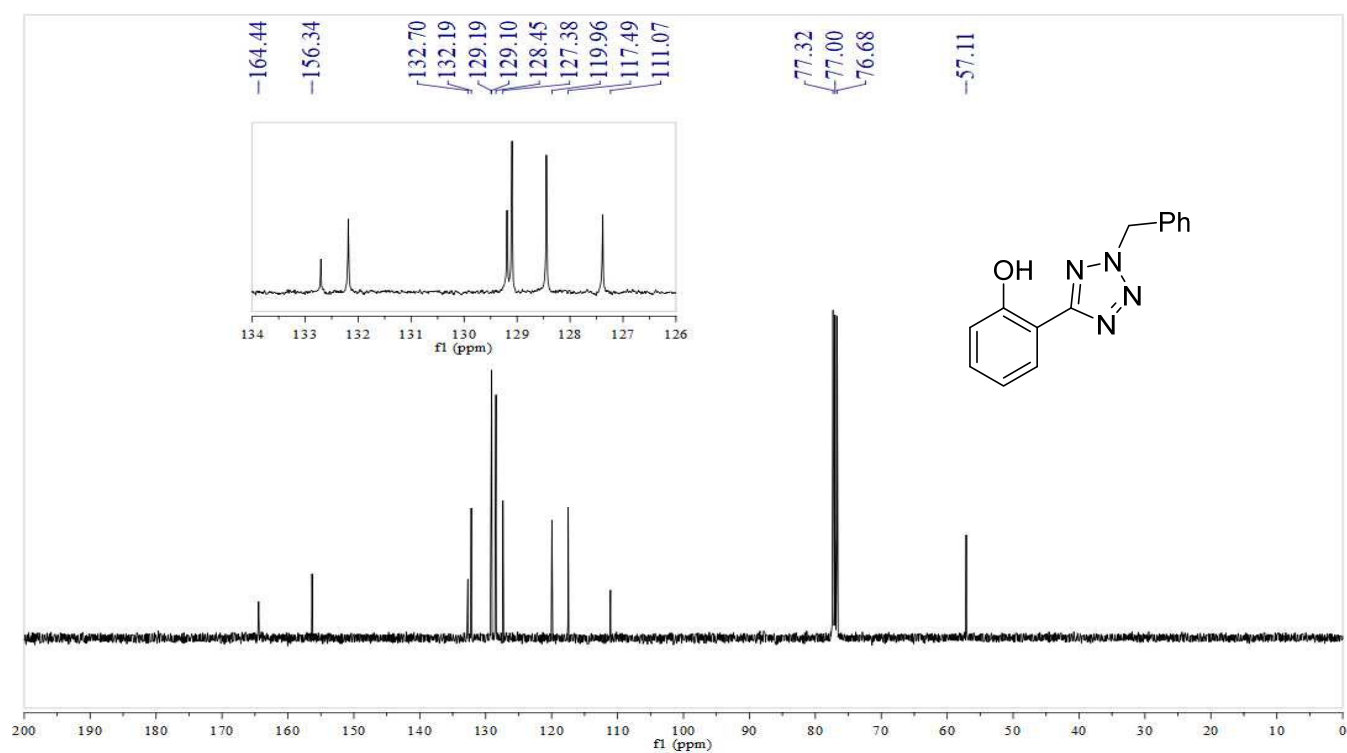

**Figure S23.** <sup>13</sup>C NMR spectrum of 2-(2-benzyl-2*H*-tetrazol-5-yl)phenol (**CAT-6**) in CDCl<sub>3</sub>.

**+MS, 0.6min #35**

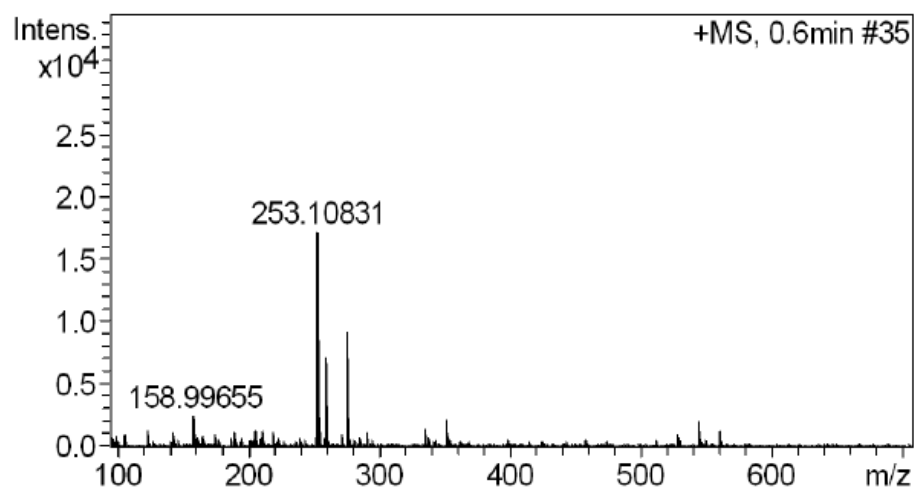

**C<sub>14</sub>H<sub>12</sub>N<sub>4</sub>O, M+nH ,253.11**

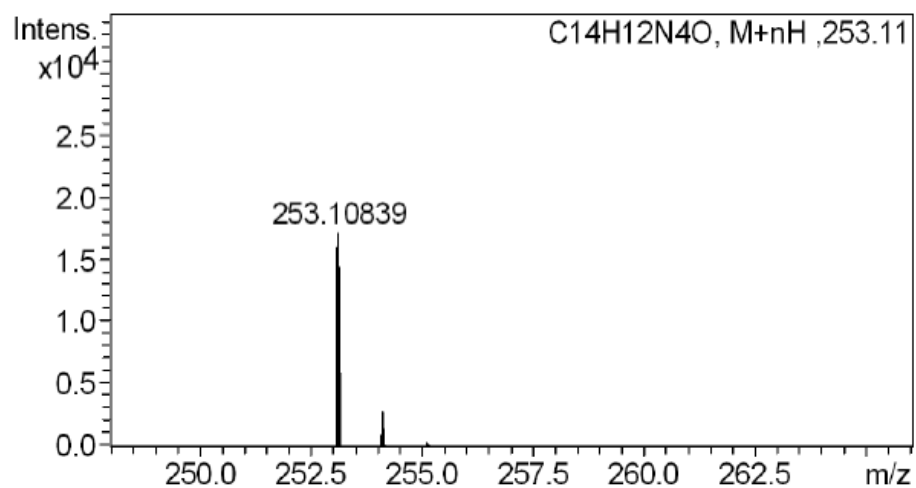

**Figure S24.** HR-MS spectrum of 2-(2-benzyl-2*H*-tetrazol-5-yl)phenol (CAT-6).

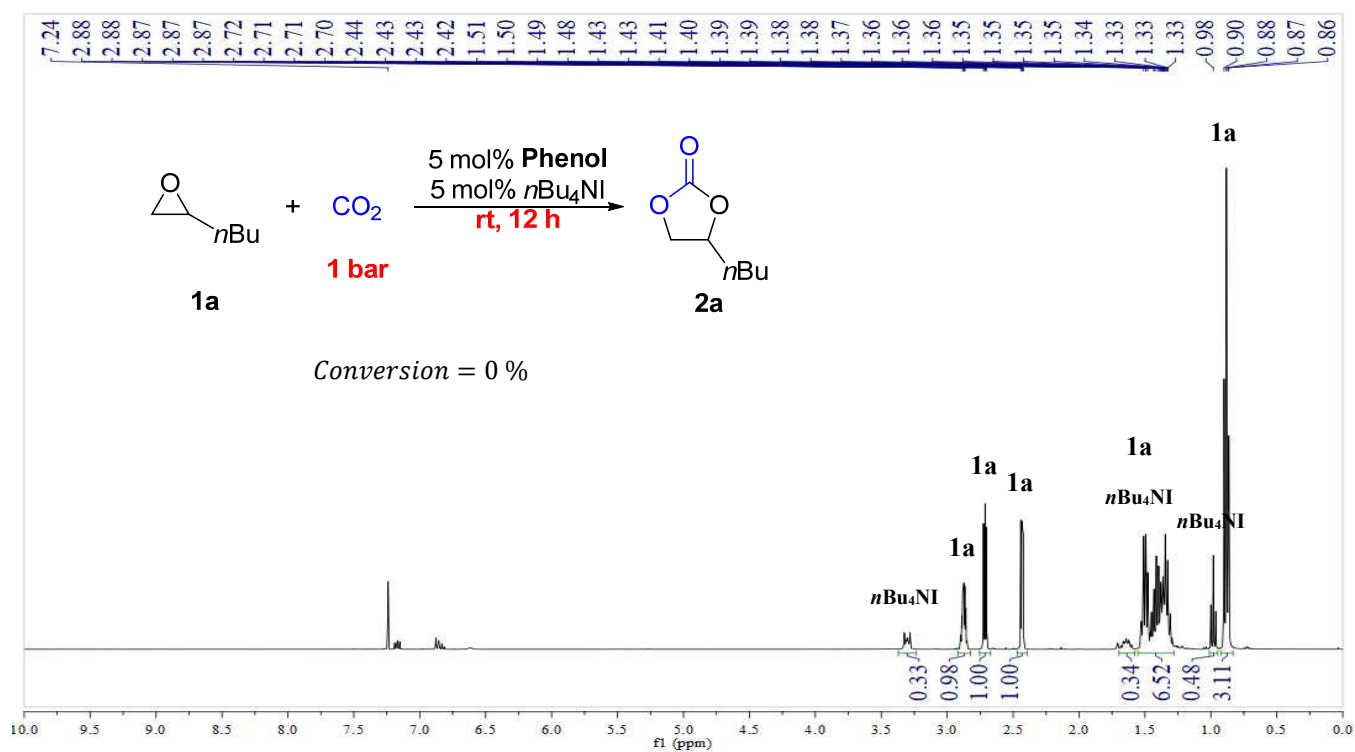

**Figure S25.**  $^1\text{H}$  NMR spectrum for an aliquot of the reaction mixture after reaction in Table 1, entry 1.

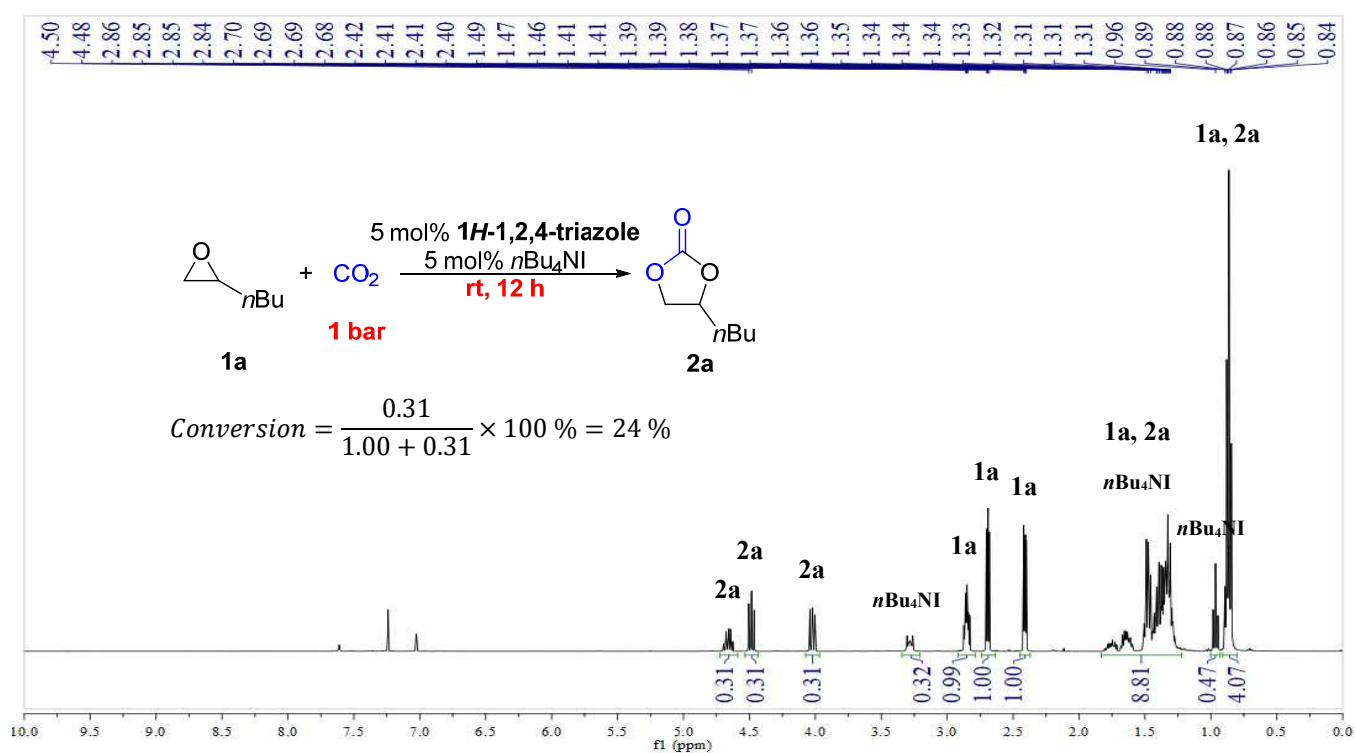

**Figure S26.**  $^1\text{H}$  NMR spectrum for an aliquot of the reaction mixture after reaction in Table 1, entry 2.

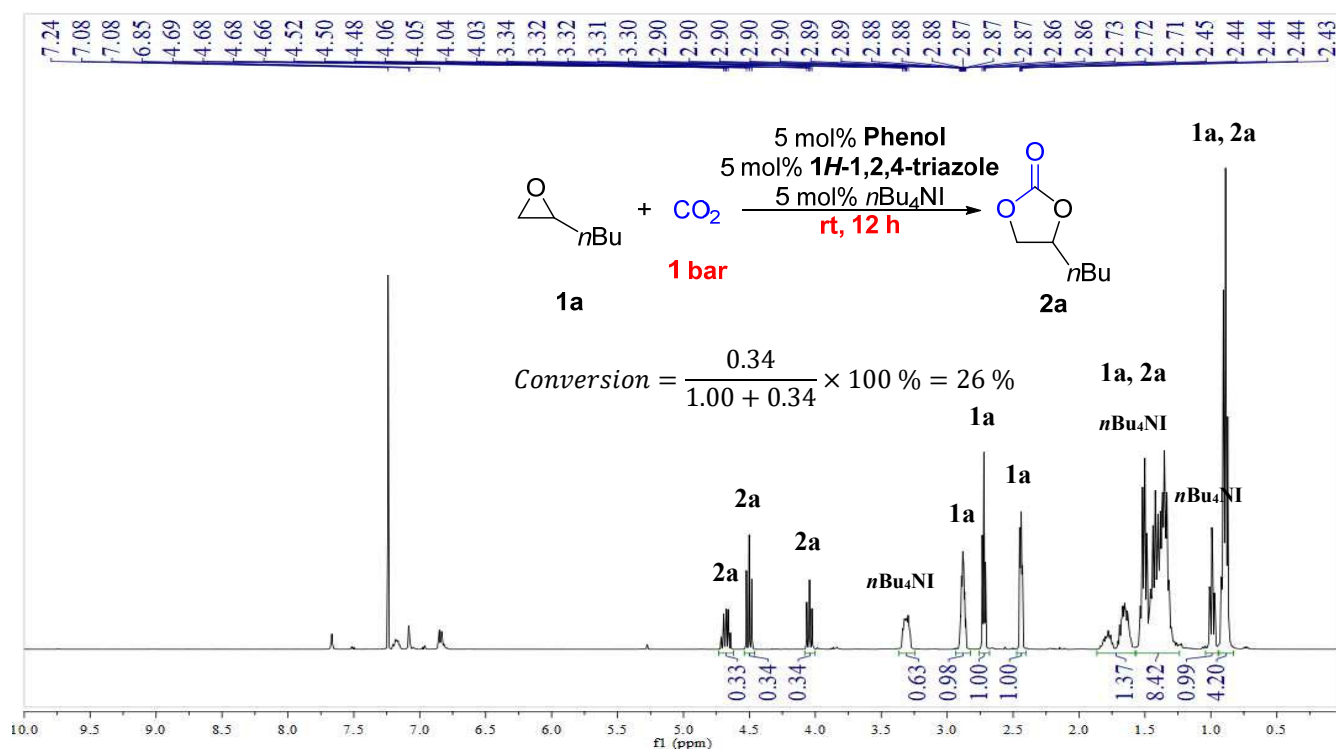

**Figure S27.** <sup>1</sup>H NMR spectrum for an aliquot of the reaction mixture after reaction in Table 1, entry 3.

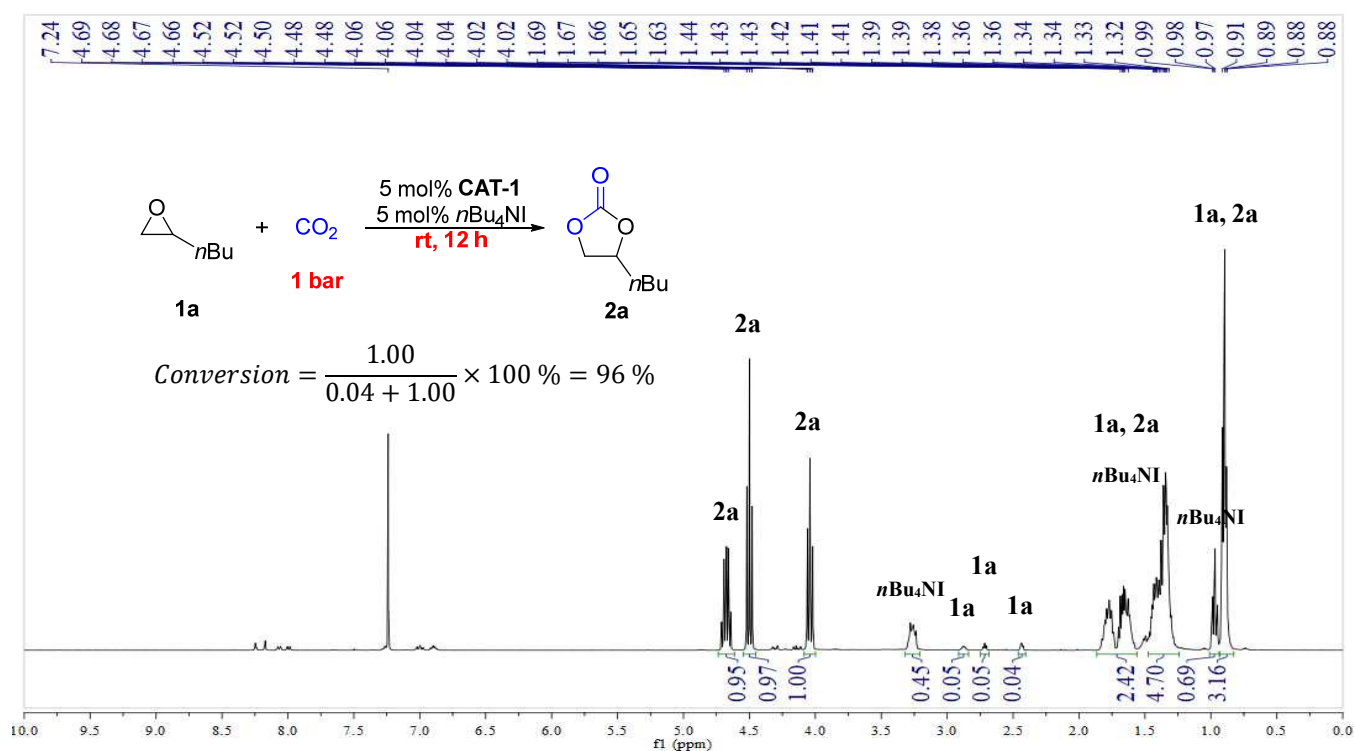

**Figure S28.** <sup>1</sup>H NMR spectrum for an aliquot of the reaction mixture after reaction in Table 1, entry 4.

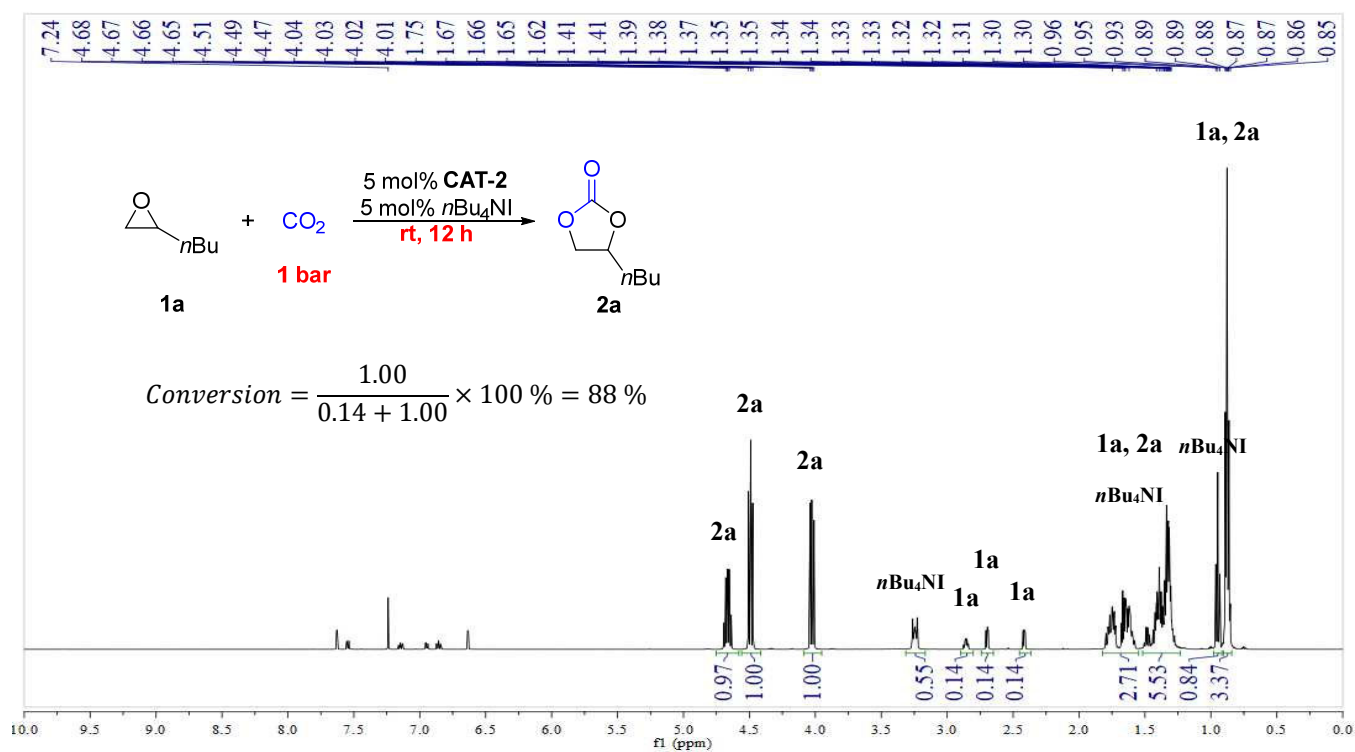

**Figure S29.**  $^1\text{H}$  NMR spectrum for an aliquot of the reaction mixture after reaction in Table 1, entry 5.

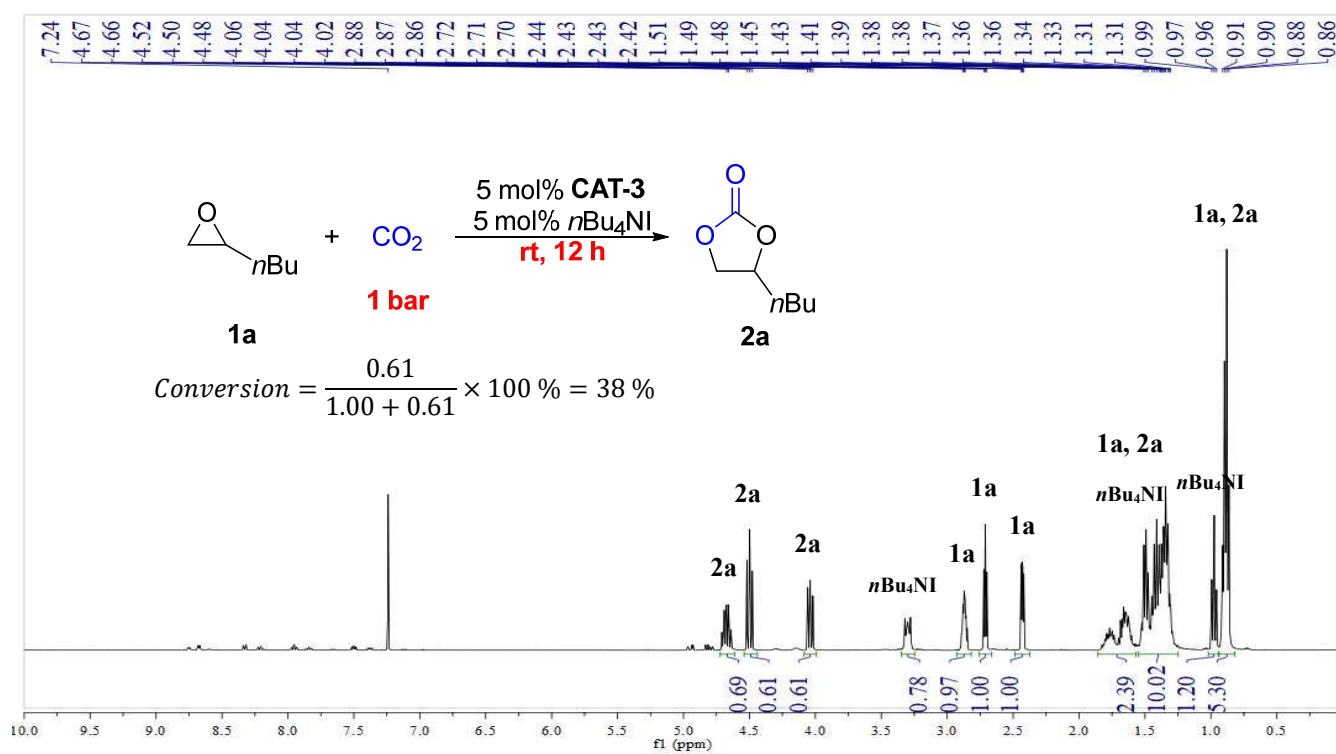

**Figure S30.**  $^1\text{H}$  NMR spectrum for an aliquot of the reaction mixture after reaction in Table 1, entry 6.

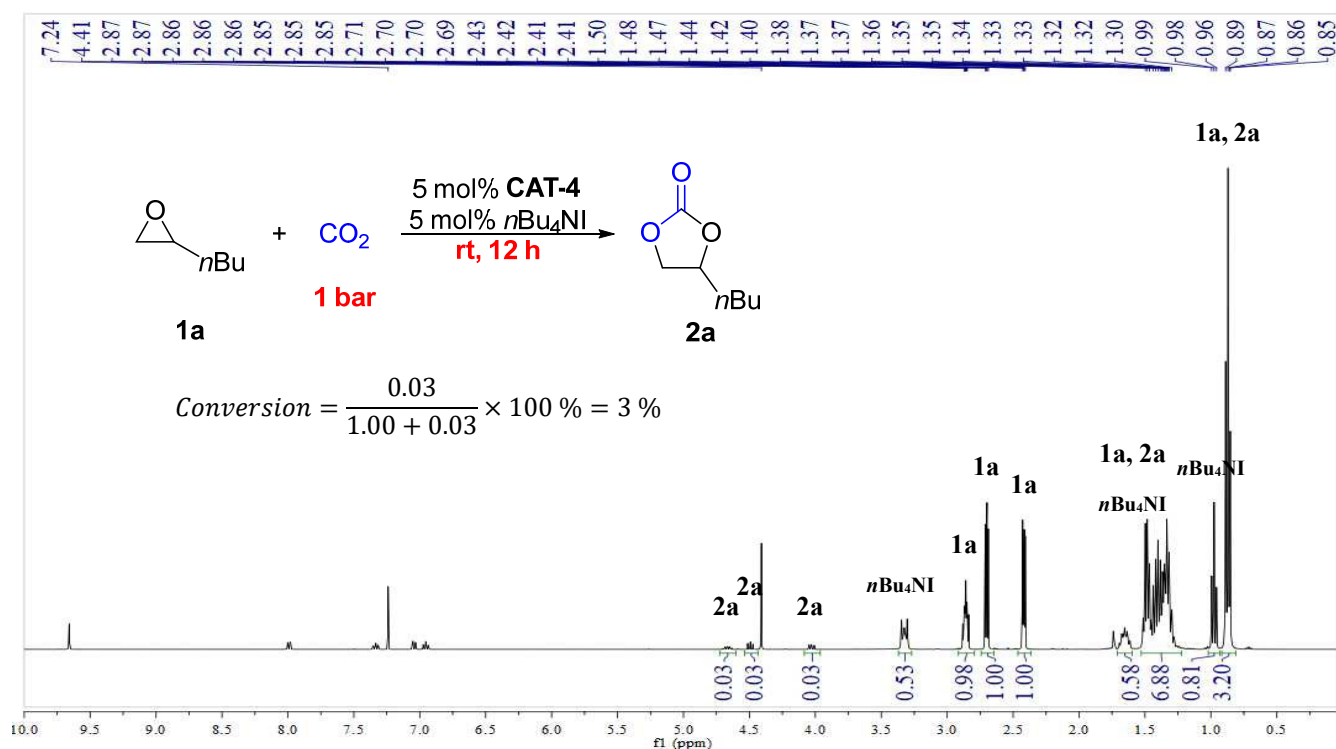

**Figure S31.**  $^1\text{H}$  NMR spectrum for an aliquot of the reaction mixture after reaction in Table 1, entry 7.

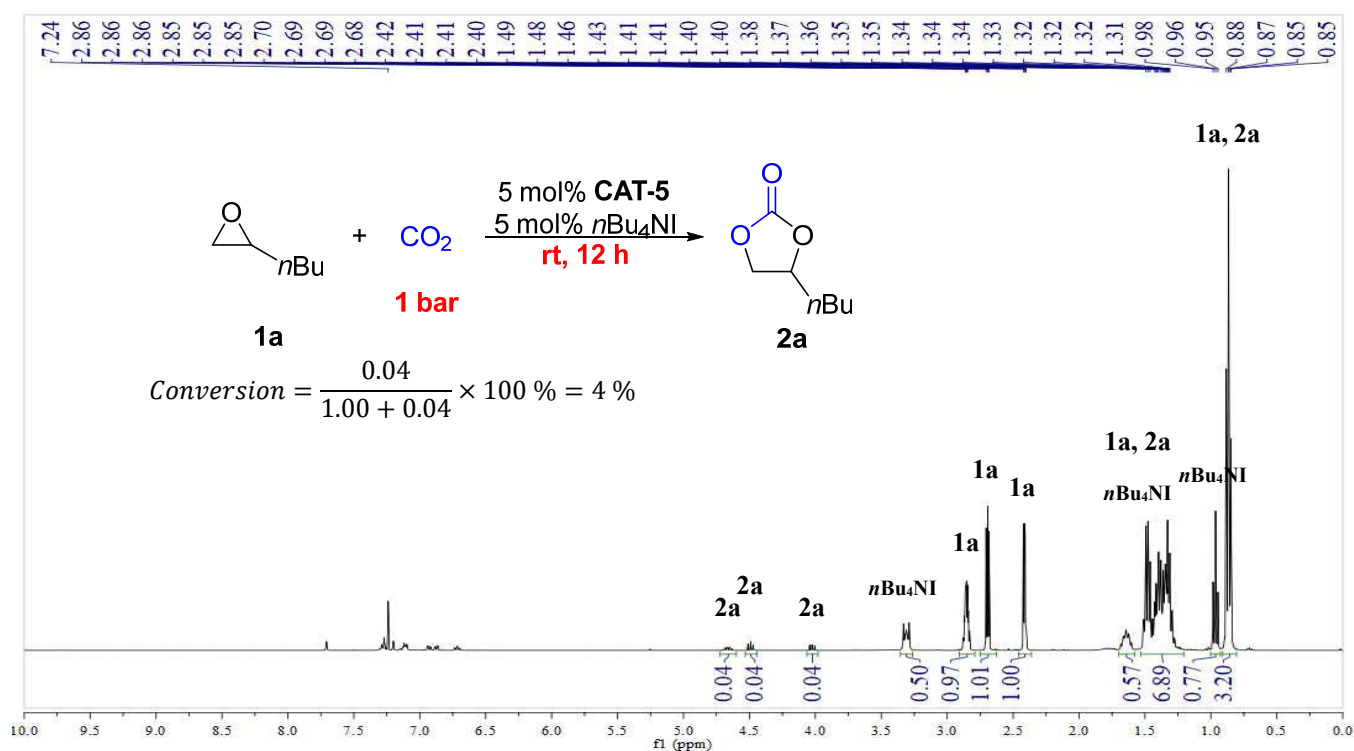

**Figure S32.**  $^1\text{H}$  NMR spectrum for an aliquot of the reaction mixture after reaction in Table 1, entry 8.



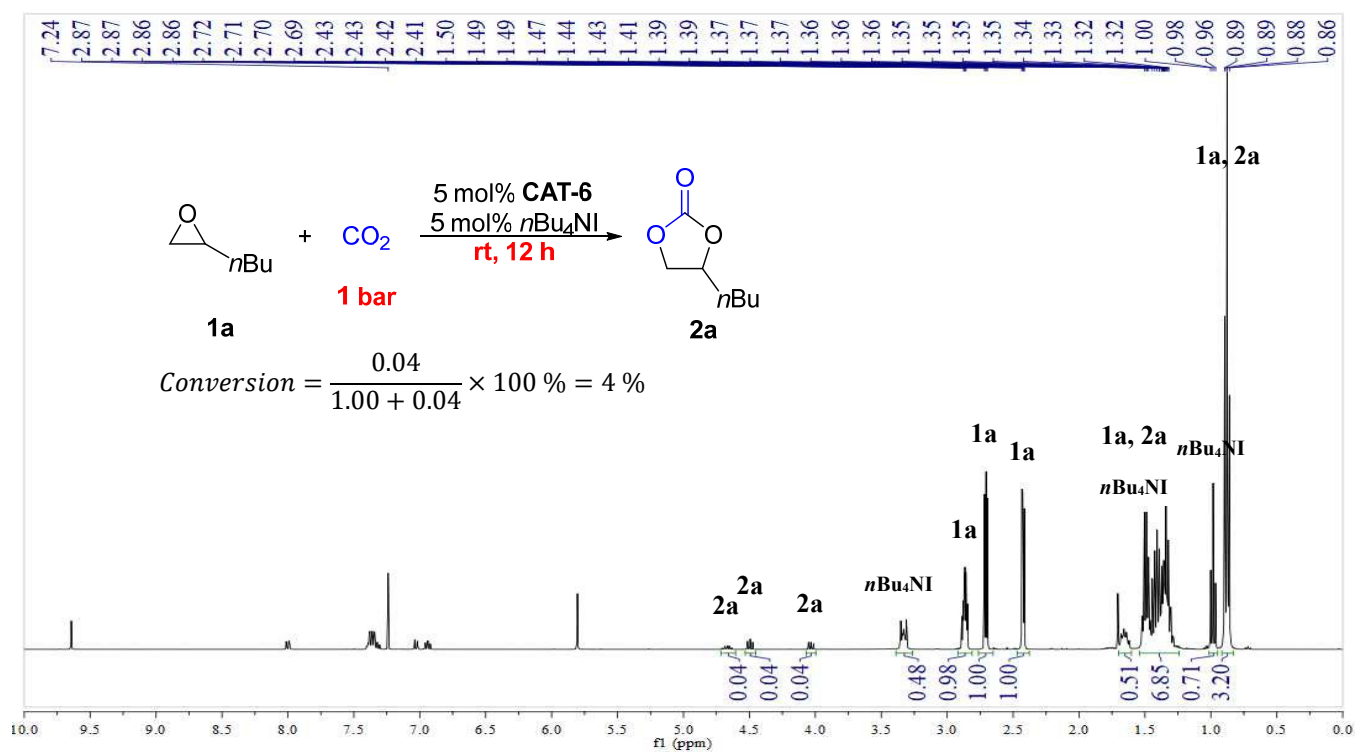

**Figure S33.**  $^1\text{H}$  NMR spectrum for an aliquot of the reaction mixture after reaction in Table 1, entry 9.

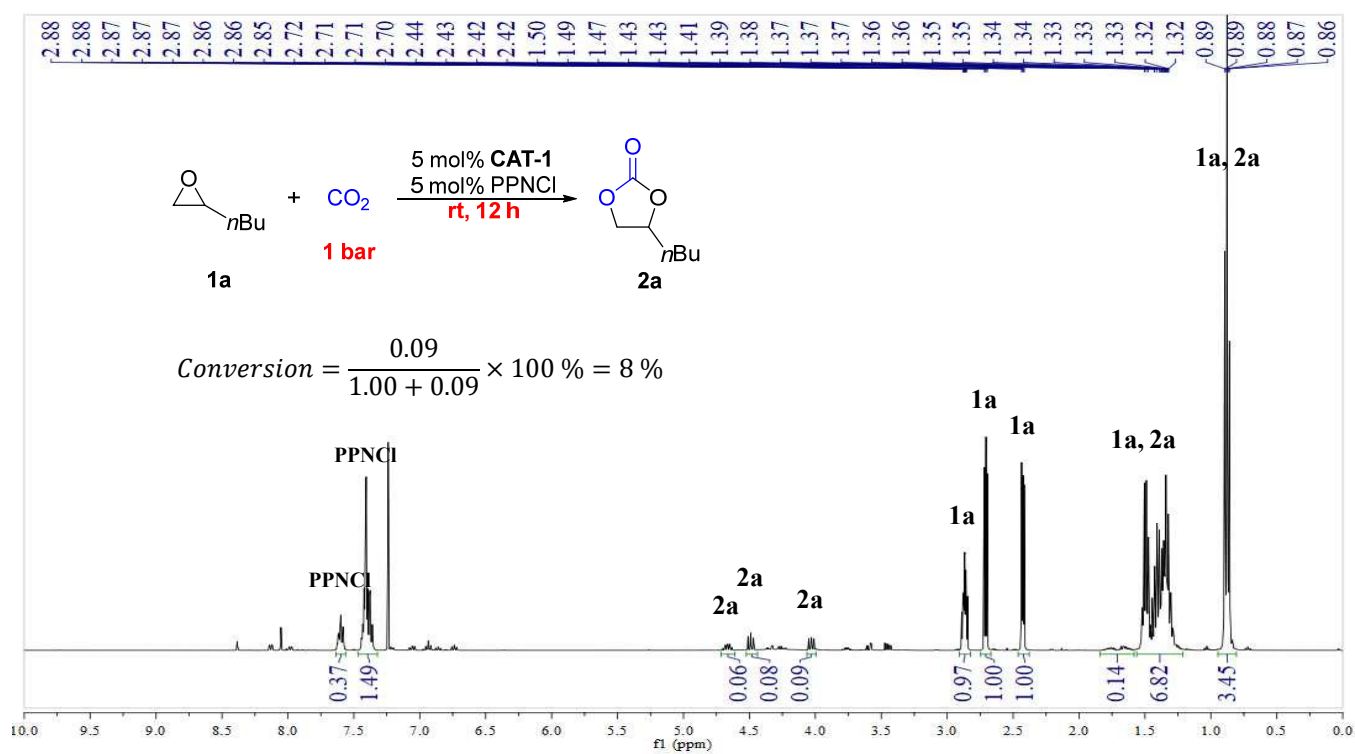

**Figure S34.**  $^1\text{H}$  NMR spectrum for an aliquot of the reaction mixture after reaction in Table 2, entry 2.



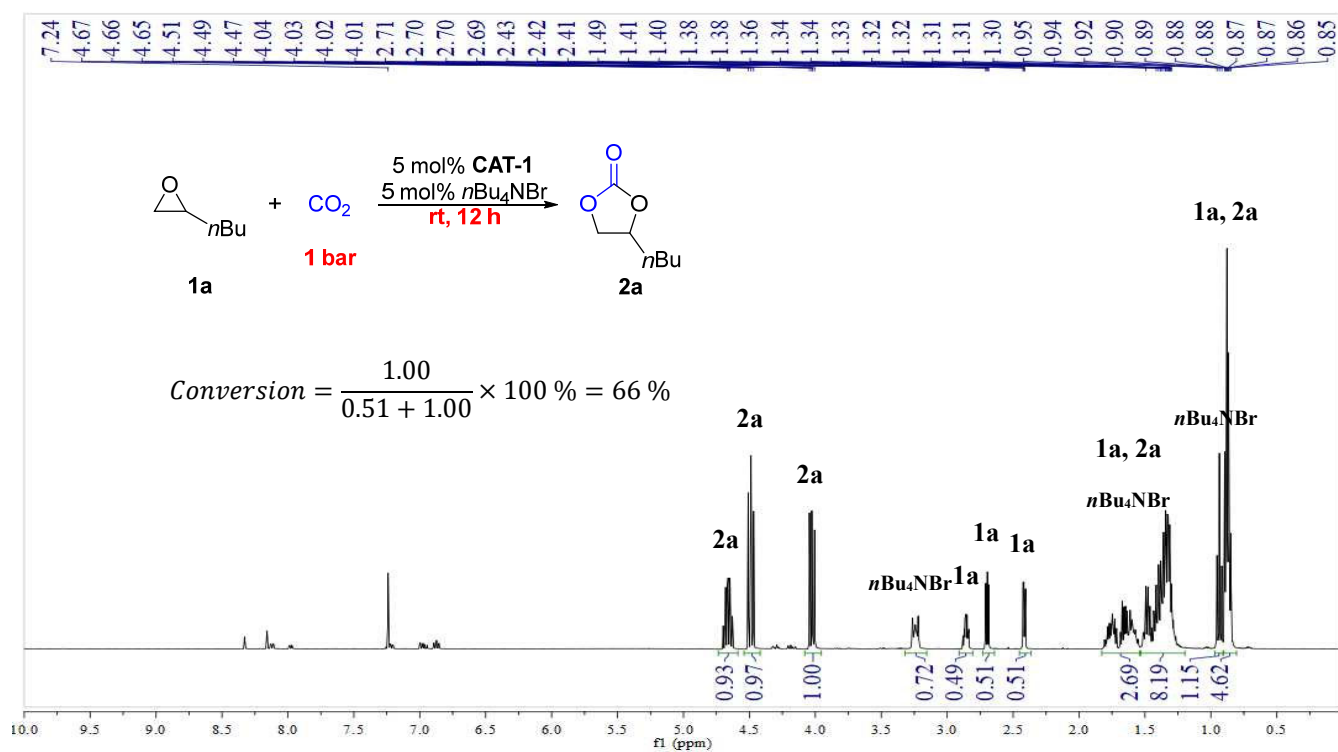

**Figure S35.**  $^1\text{H}$  NMR spectrum for an aliquot of the reaction mixture after reaction in Table 2, entry 3.

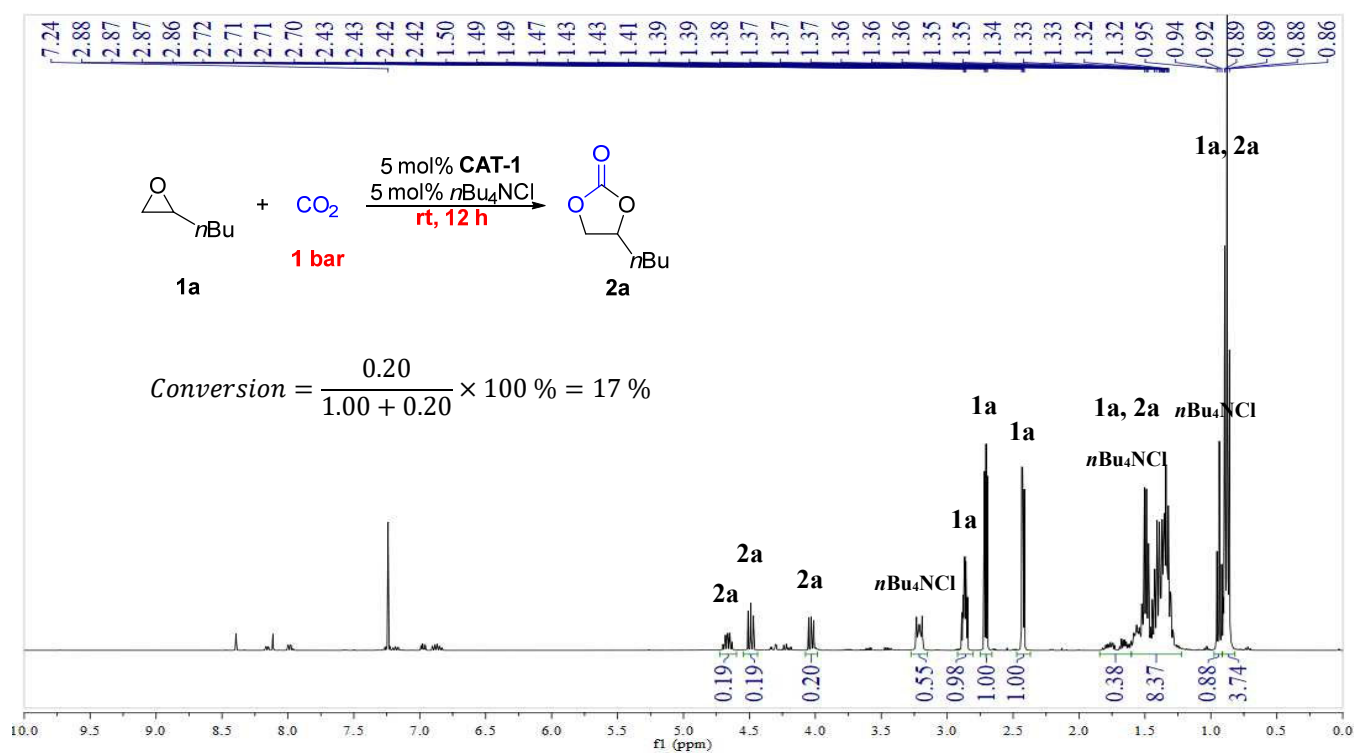

**Figure S36.**  $^1\text{H}$  NMR spectrum for an aliquot of the reaction mixture after reaction in Table 2, entry 4.

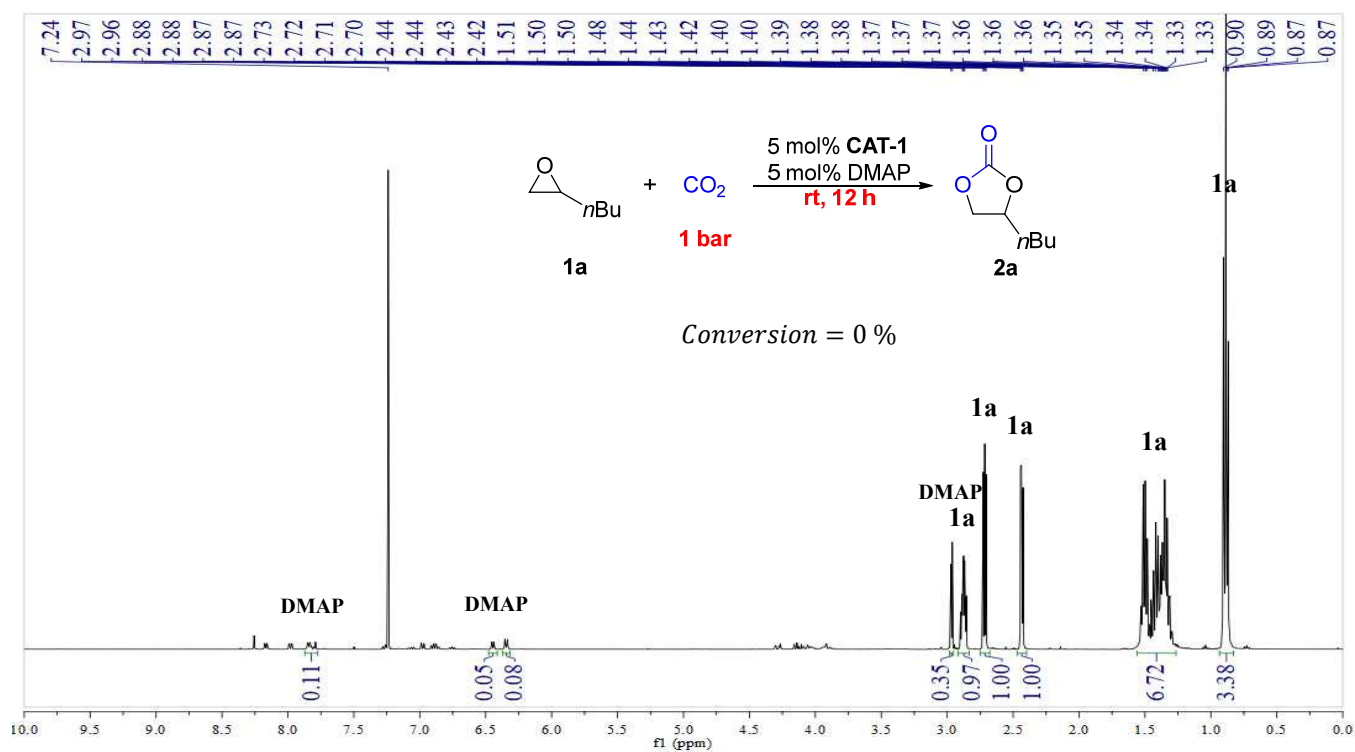

**Figure S37.** <sup>1</sup>H NMR spectrum for an aliquot of the reaction mixture after reaction in Table 2, entry 5.

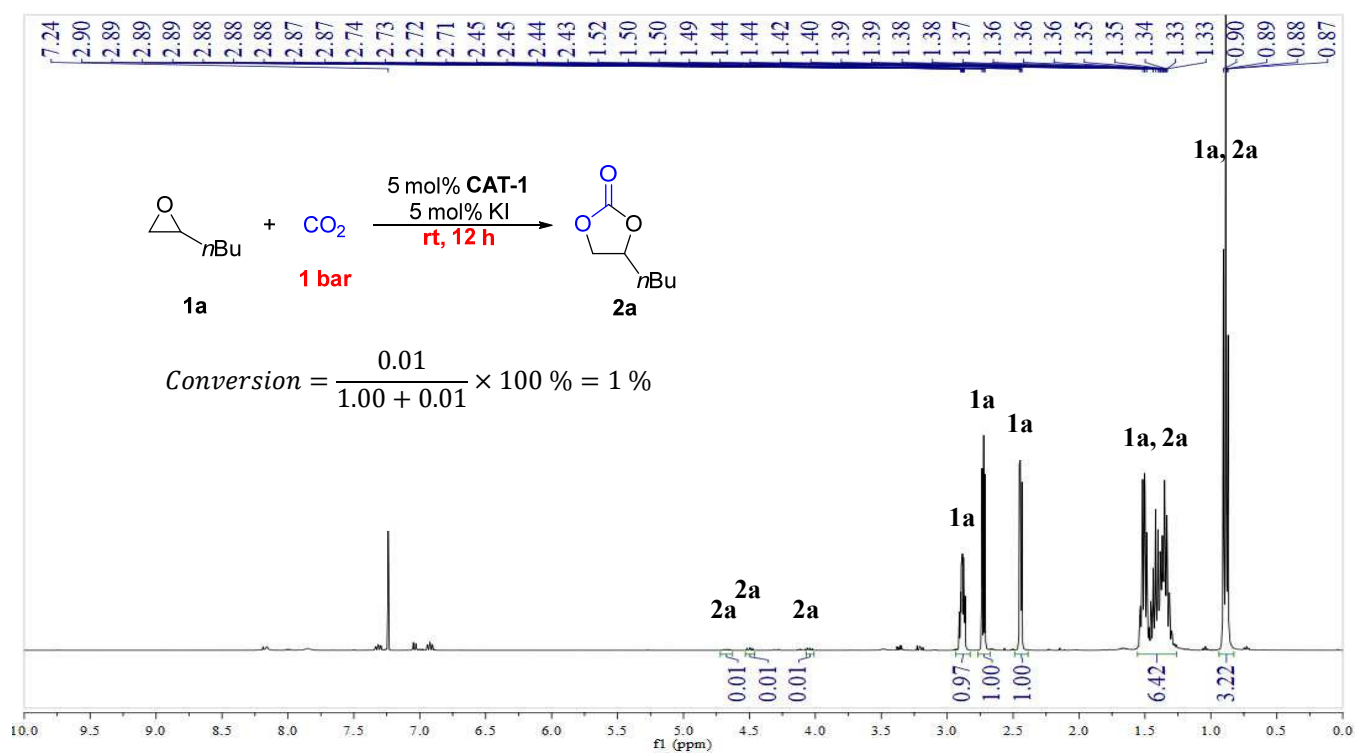

**Figure S38.** <sup>1</sup>H NMR spectrum for an aliquot of the reaction mixture after reaction in Table 2, entry 6.



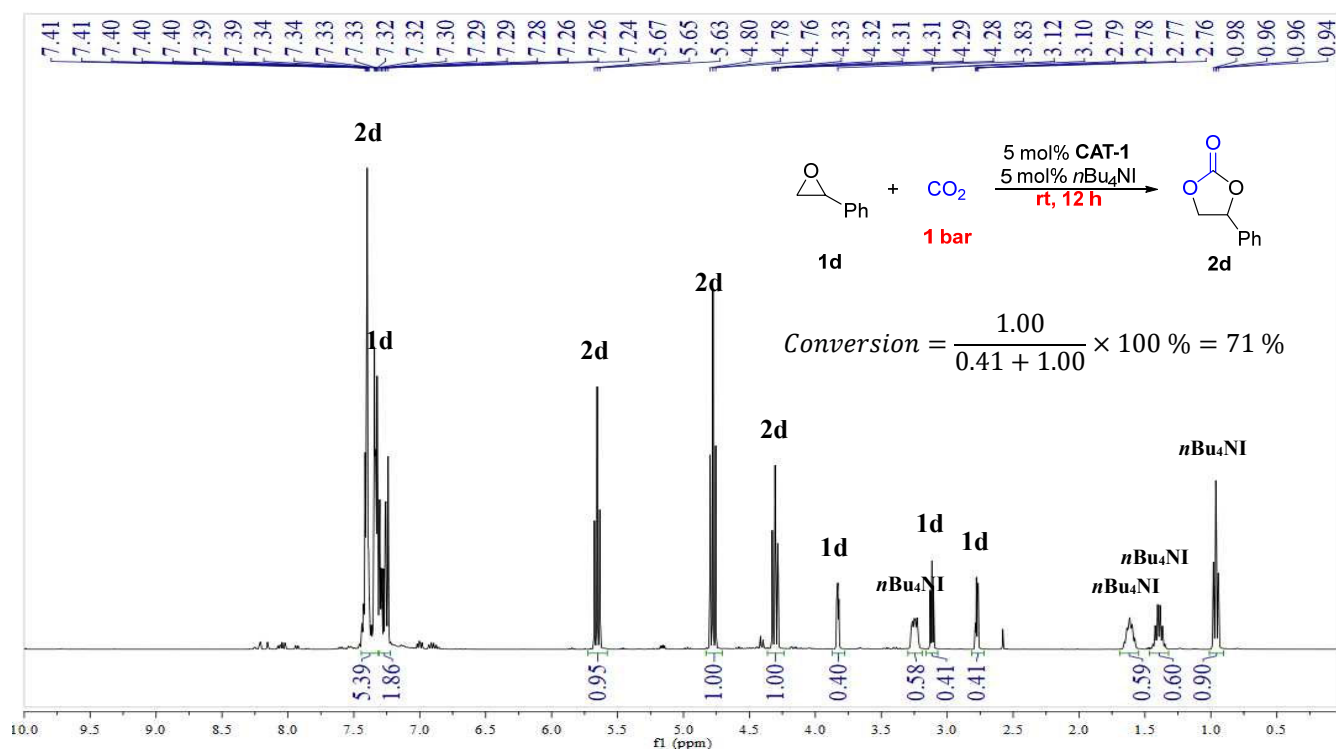

**Figure S41.** <sup>1</sup>H NMR spectrum for an aliquot containing mixtures after reaction for **2d** in Figure 3.

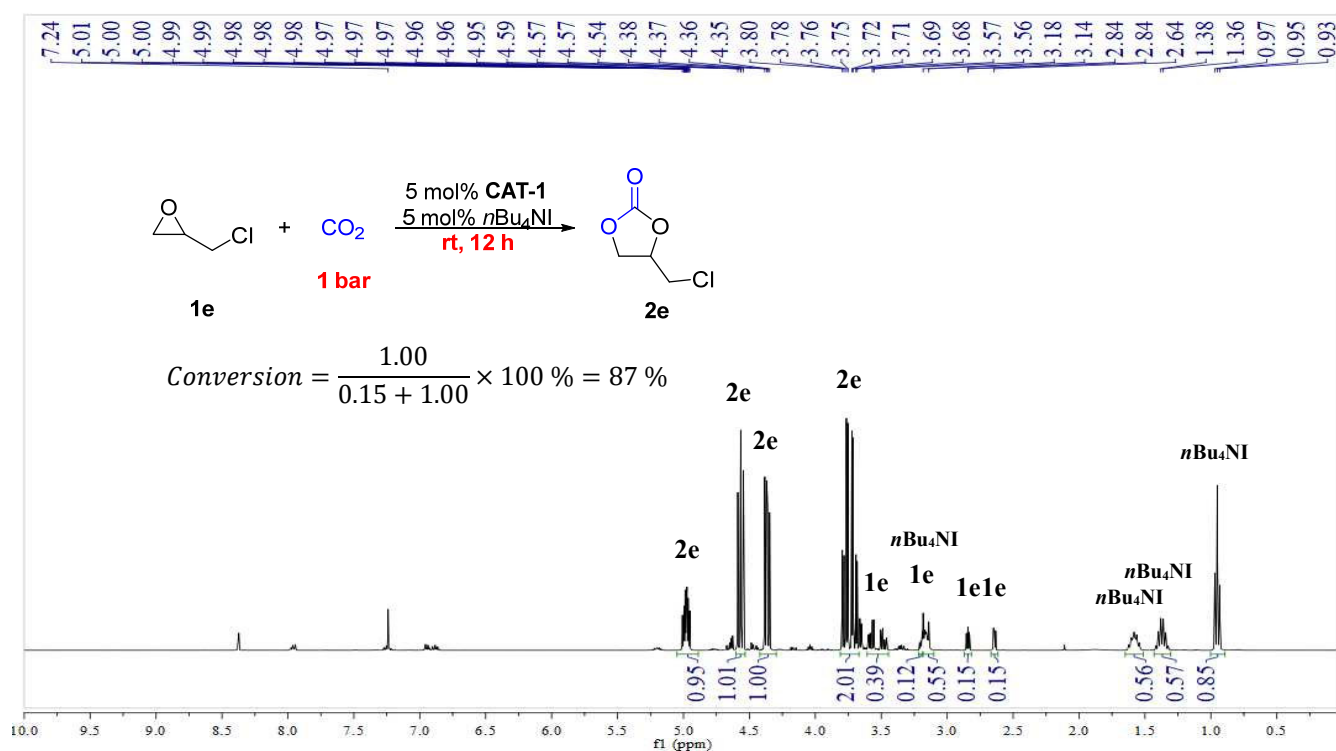

**Figure S42.** <sup>1</sup>H NMR spectrum for an aliquot containing mixtures after reaction for **2e** in Figure 3.

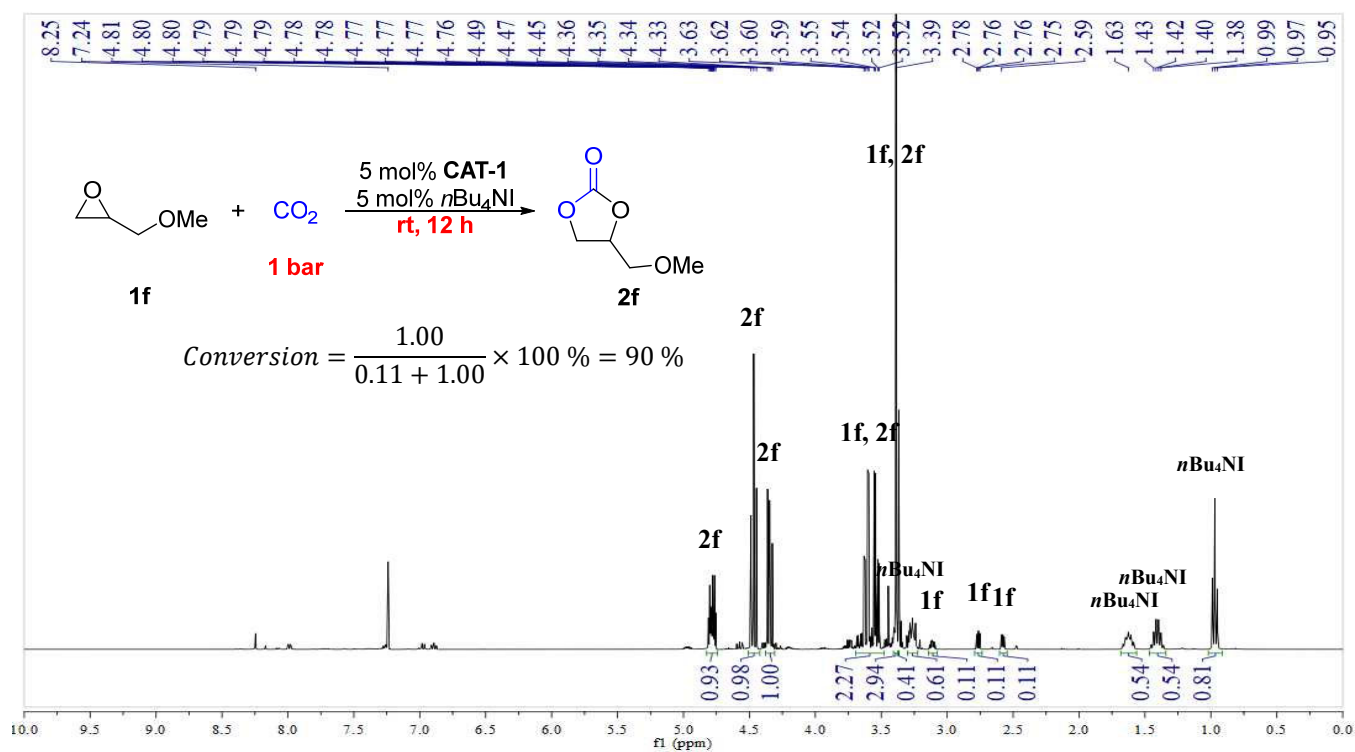

**Figure S43.**  $^1\text{H}$  NMR spectrum for an aliquot containing mixtures after reaction for **2f** in Figure 3.

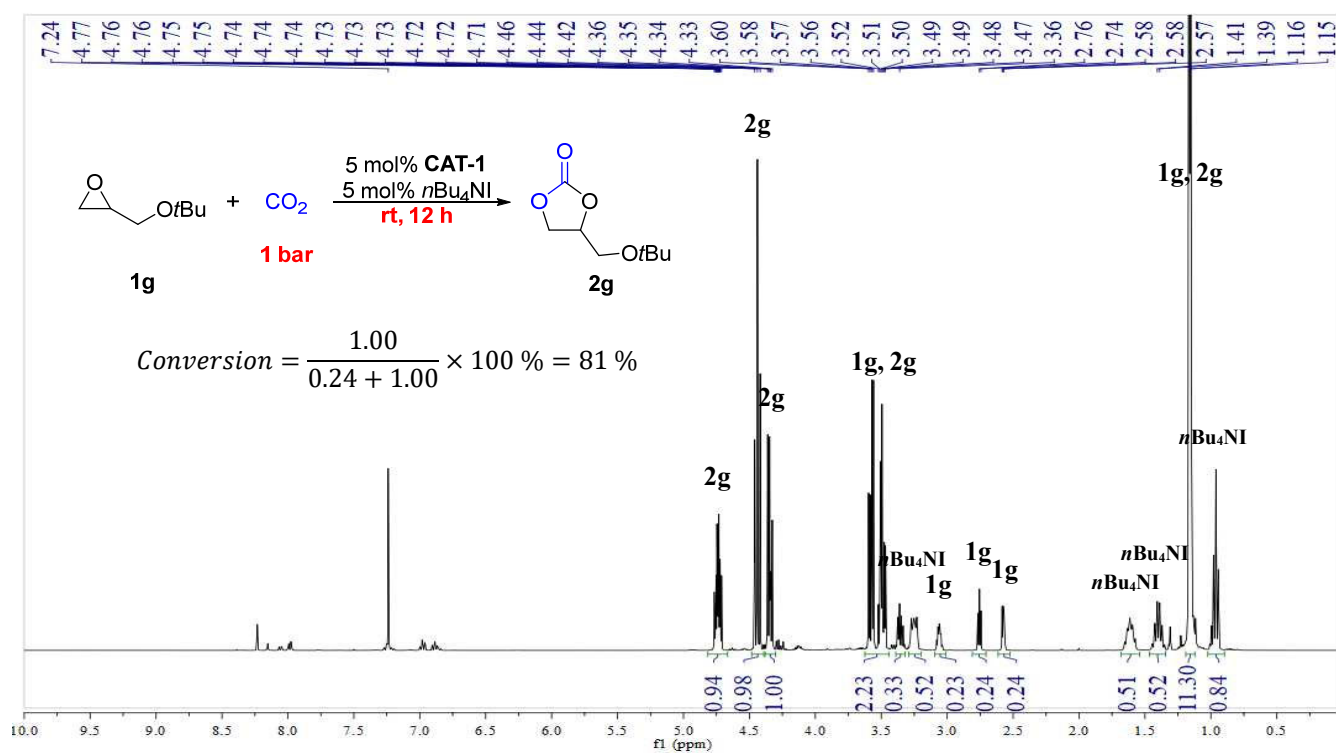

**Figure S44.**  $^1\text{H}$  NMR spectrum for an aliquot containing mixtures after reaction for **2g** in Figure 3.

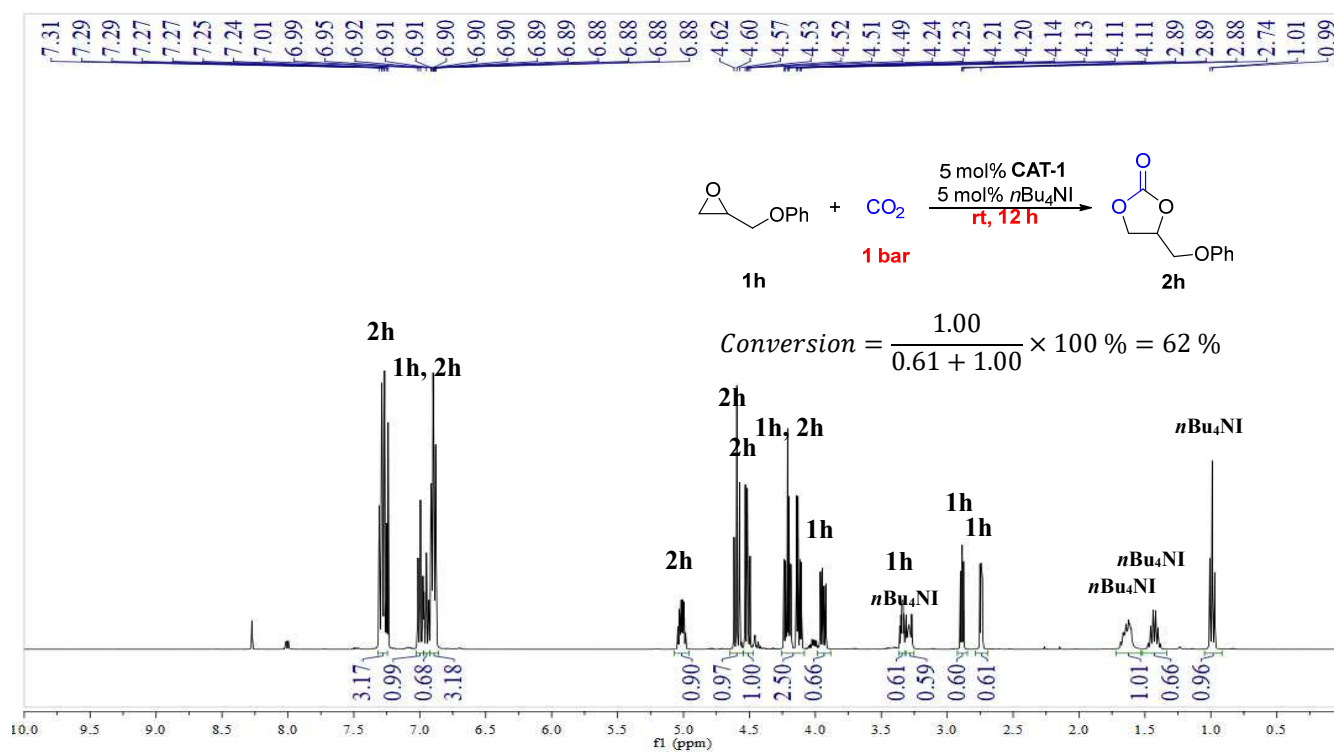

**Figure S45.**  $^1\text{H}$  NMR spectrum for an aliquot containing mixtures after reaction for **2h** in Figure 3.

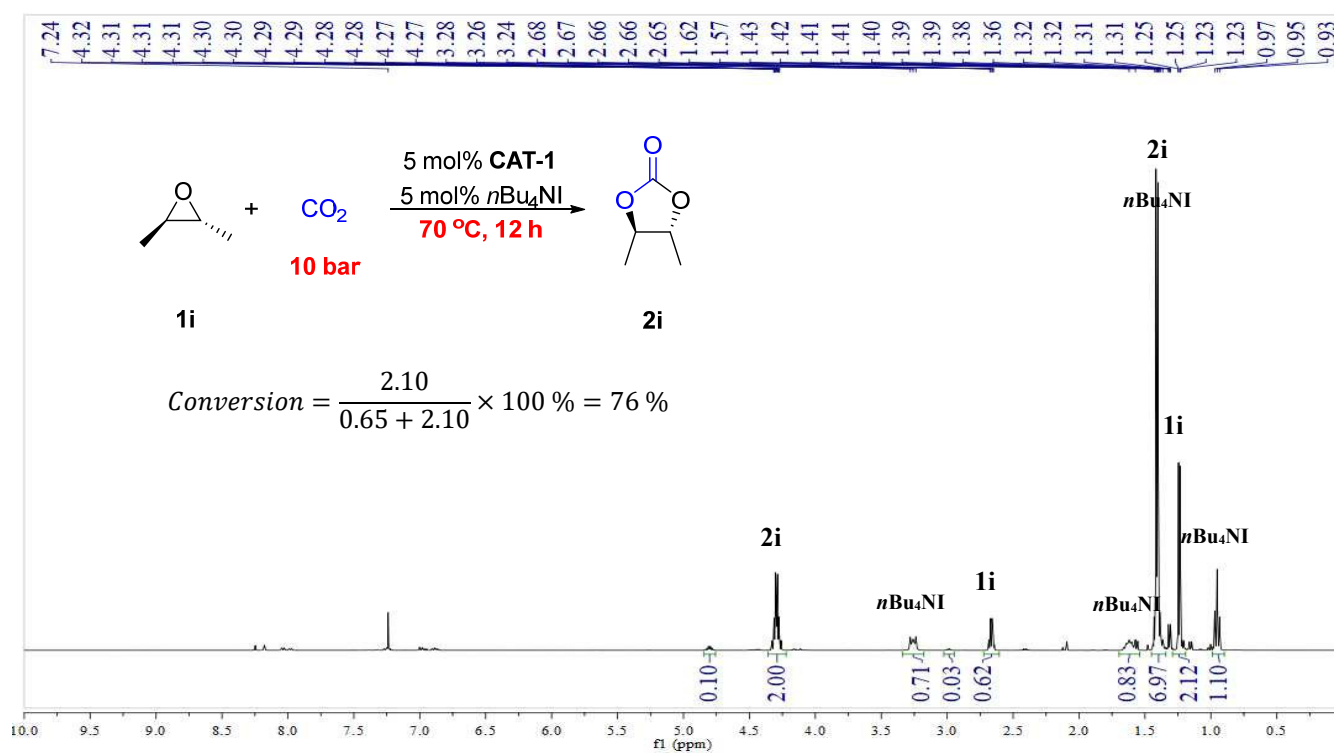

**Figure S46.**  $^1\text{H}$  NMR spectrum for an aliquot containing mixtures after reaction for *trans*-**2i** in Figure 4.



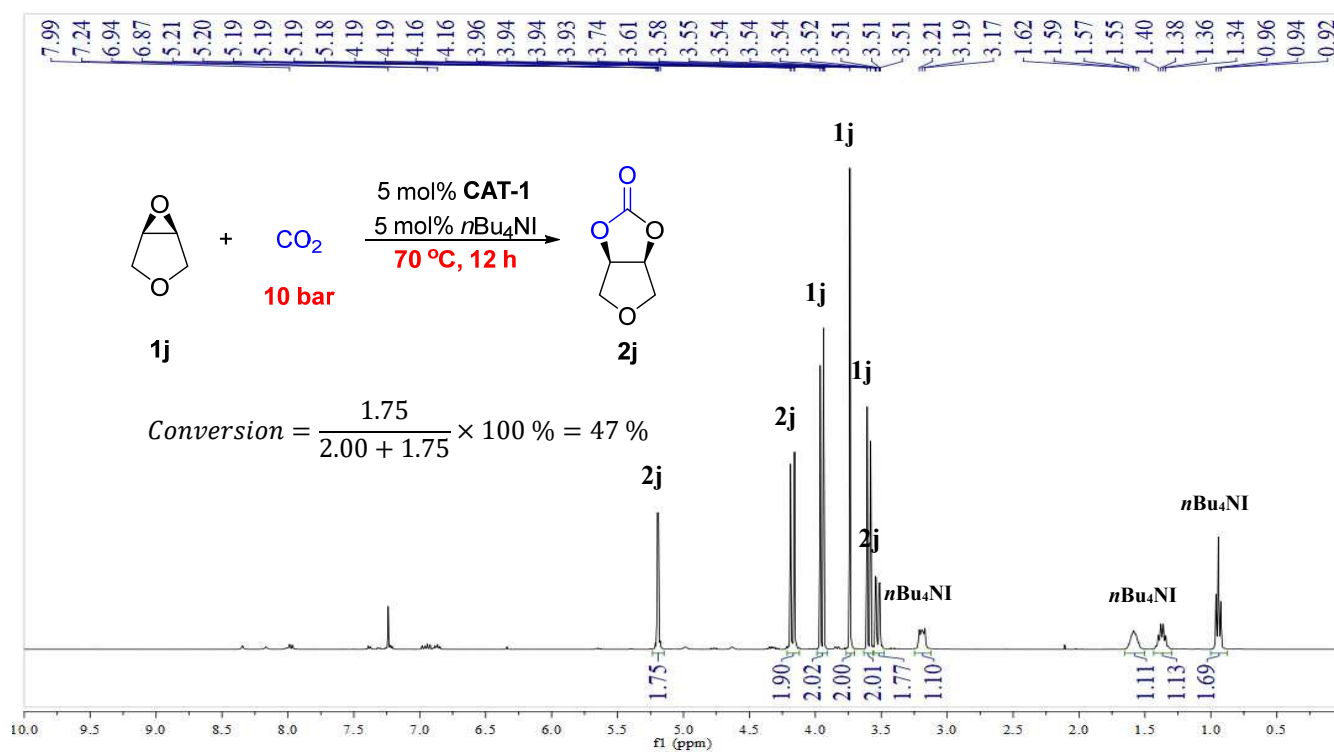

**Figure S47.**  $^1\text{H}$  NMR spectrum for an aliquot containing mixtures after reaction for *cis*-**2j** in Figure 4.

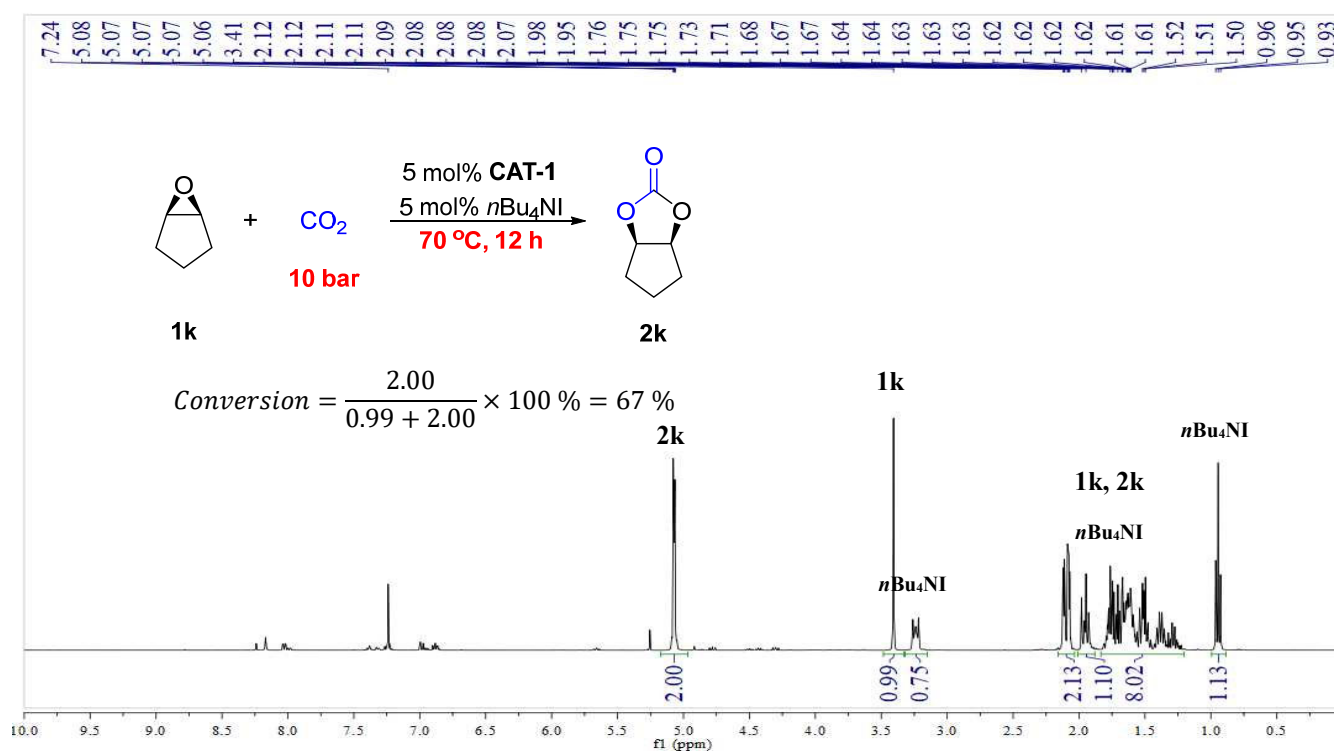

**Figure S48.**  $^1\text{H}$  NMR spectrum for an aliquot containing mixtures after reaction for *cis*-**2k** in Figure 4.

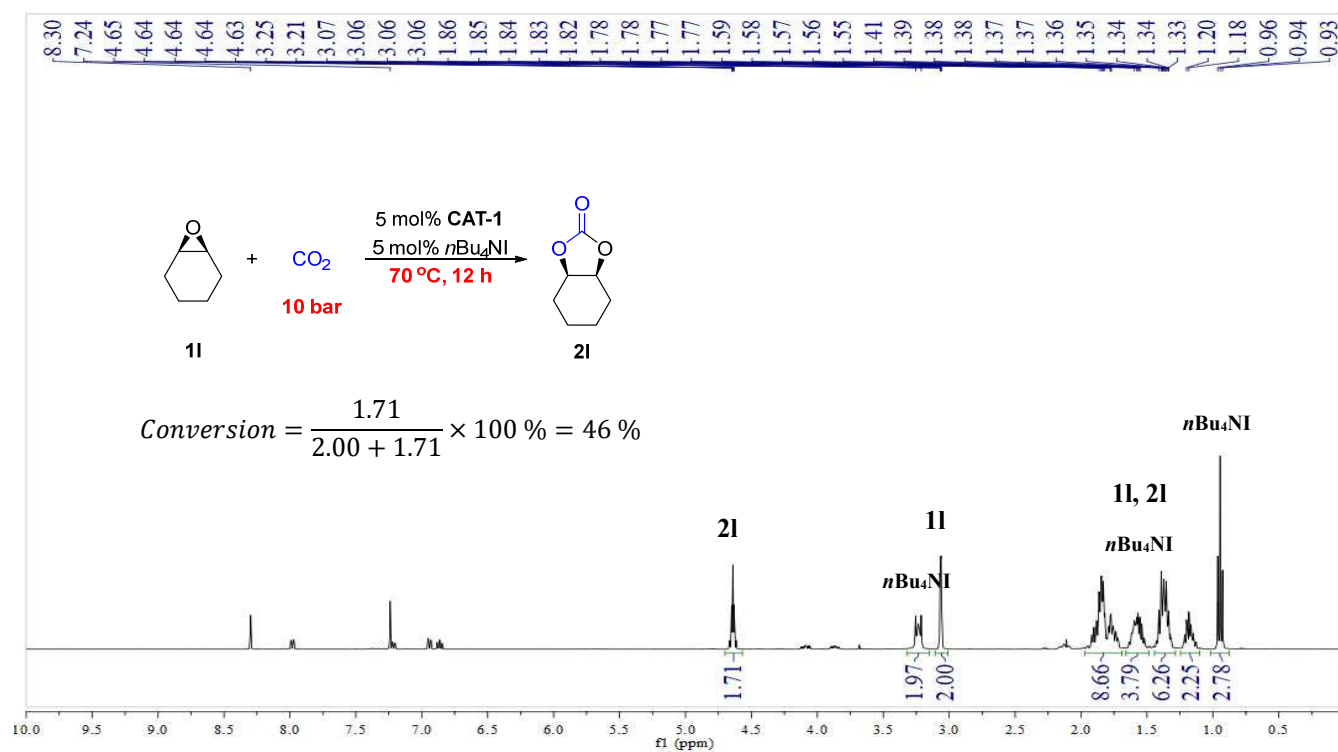

**Figure S49.** <sup>1</sup>H NMR spectrum for an aliquot containing mixtures after reaction for *cis*-**21** in Figure 4.



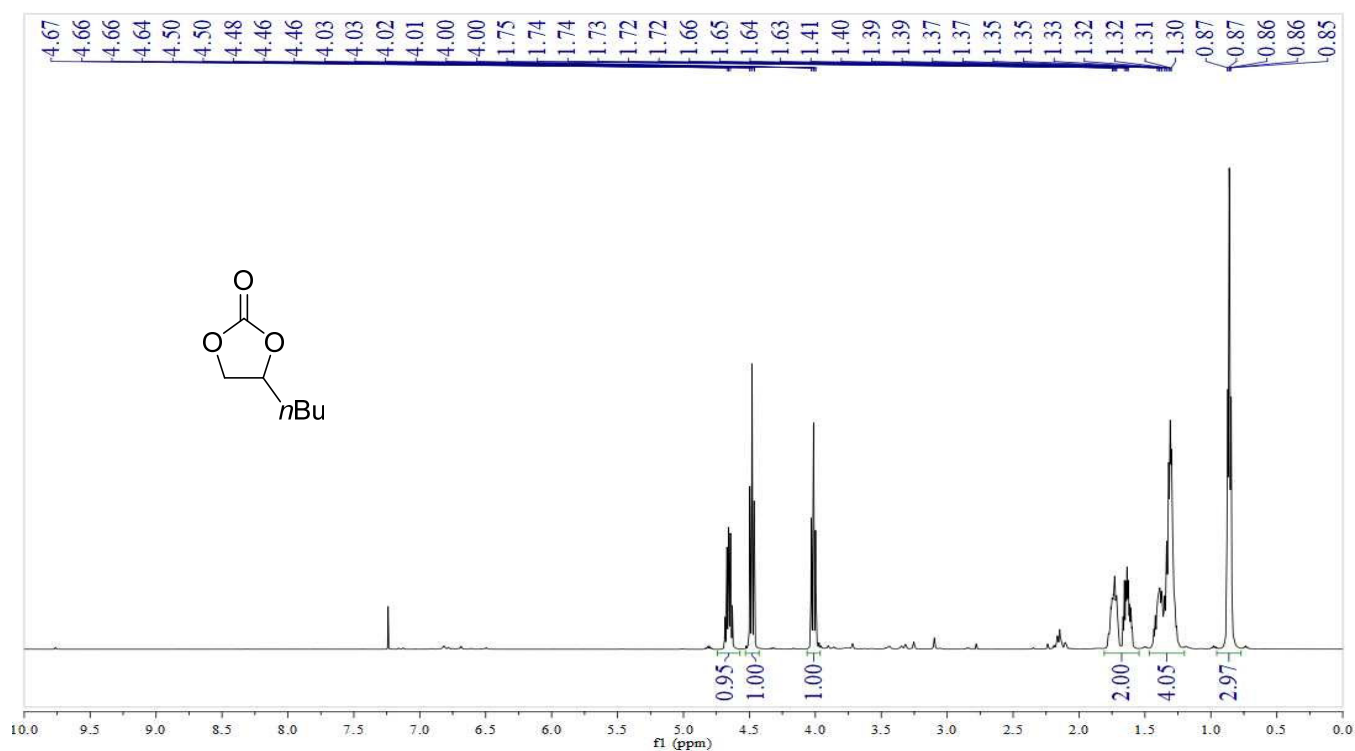

**Figure S50.** <sup>1</sup>H NMR spectrum of purified 4-butyl-1,3-dioxolan-2-one (**2a**) in CDCl<sub>3</sub>.

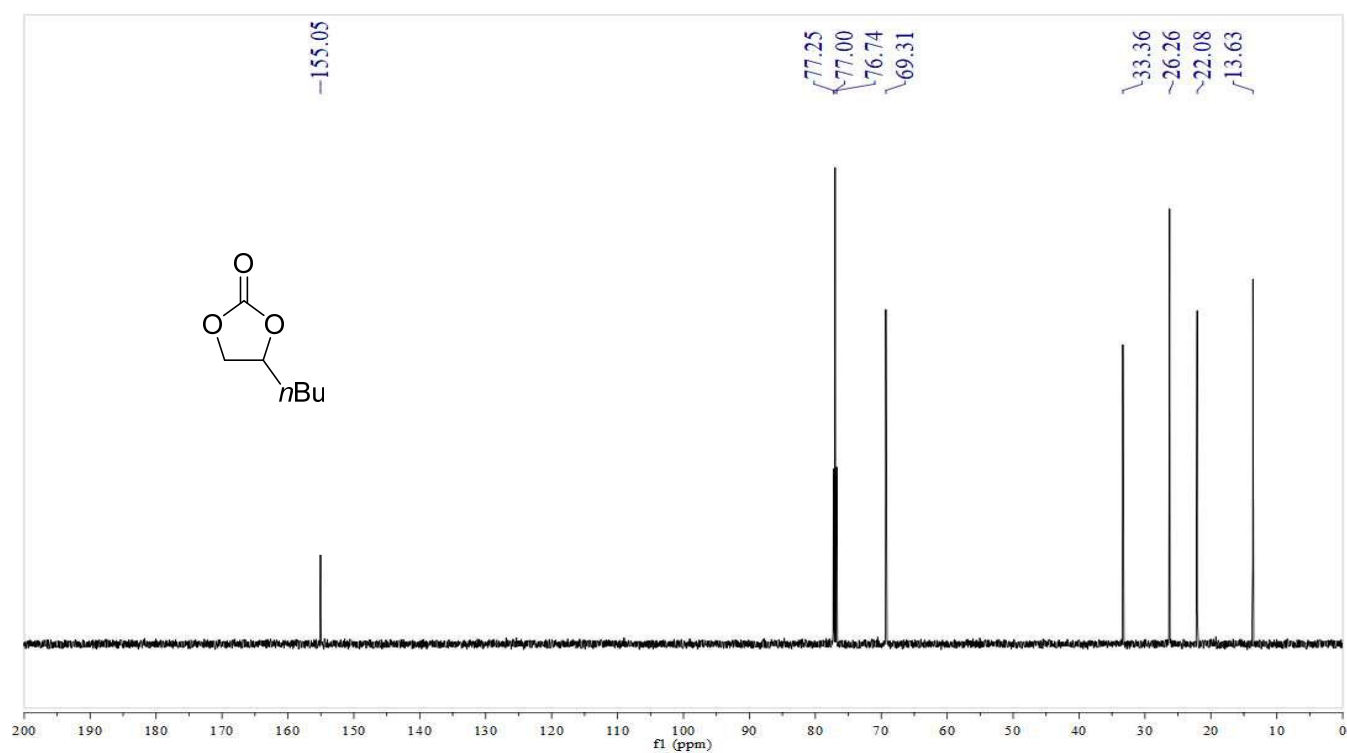

**Figure S51.** <sup>13</sup>C NMR spectrum of purified 4-butyl-1,3-dioxolan-2-one (**2a**) in CDCl<sub>3</sub>.

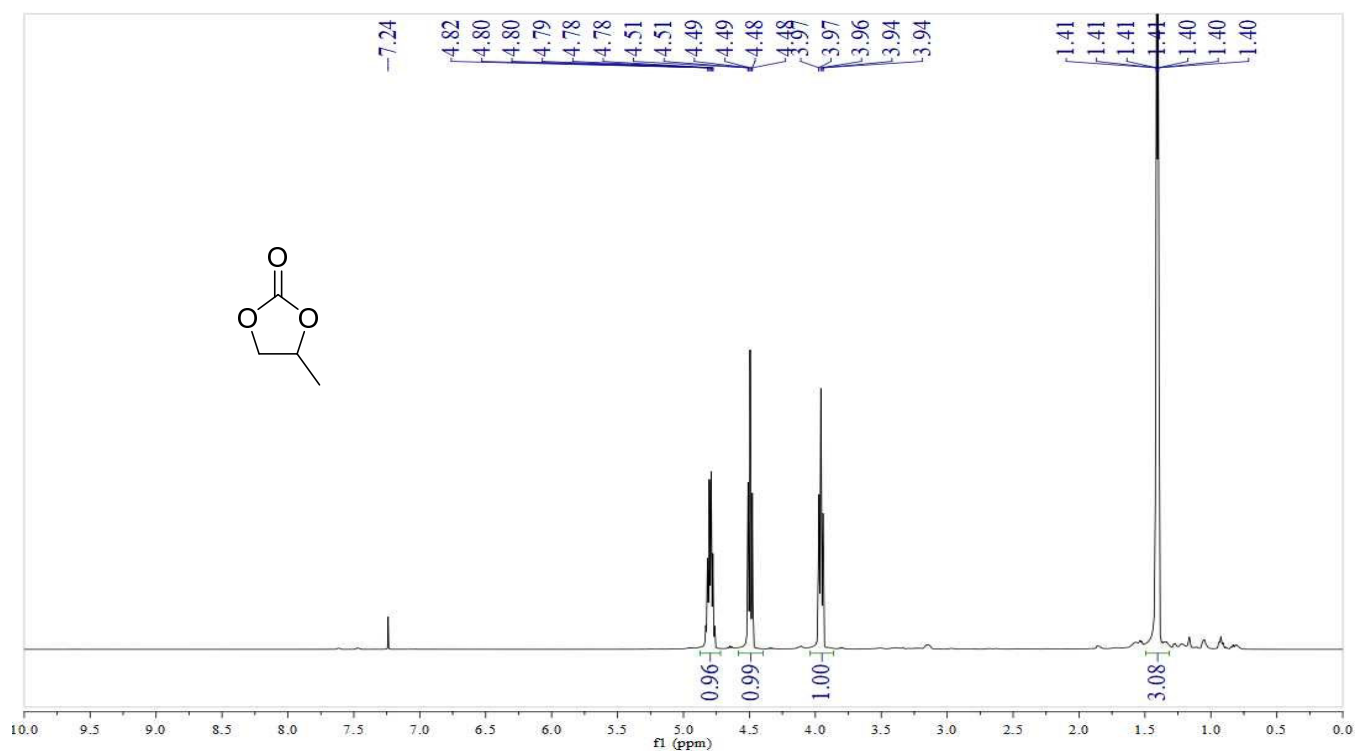

**Figure S52.**  $^1\text{H}$  NMR spectrum of purified 4-methyl-1,3-dioxolan-2-one (**2b**) in  $\text{CDCl}_3$ .

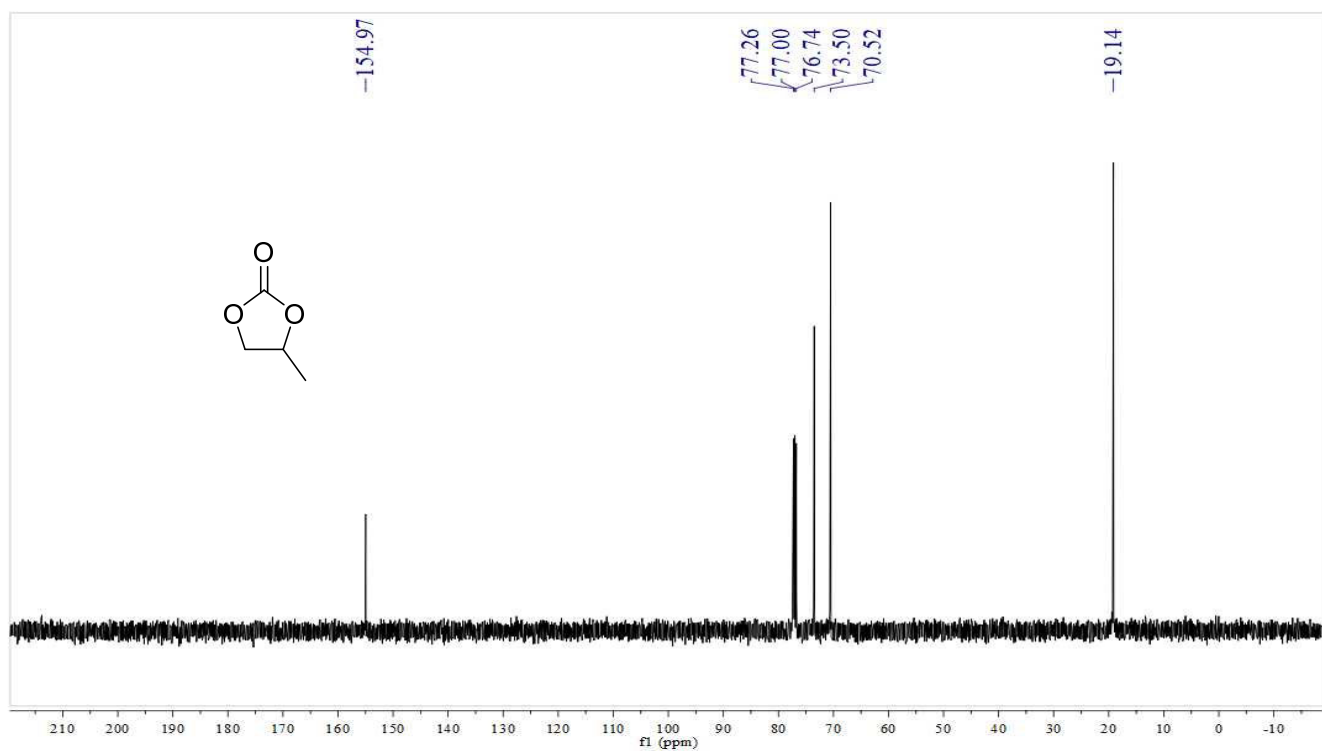

**Figure S53.**  $^{13}\text{C}$  NMR spectrum of purified 4-methyl-1,3-dioxolan-2-one (**2b**) in  $\text{CDCl}_3$ .

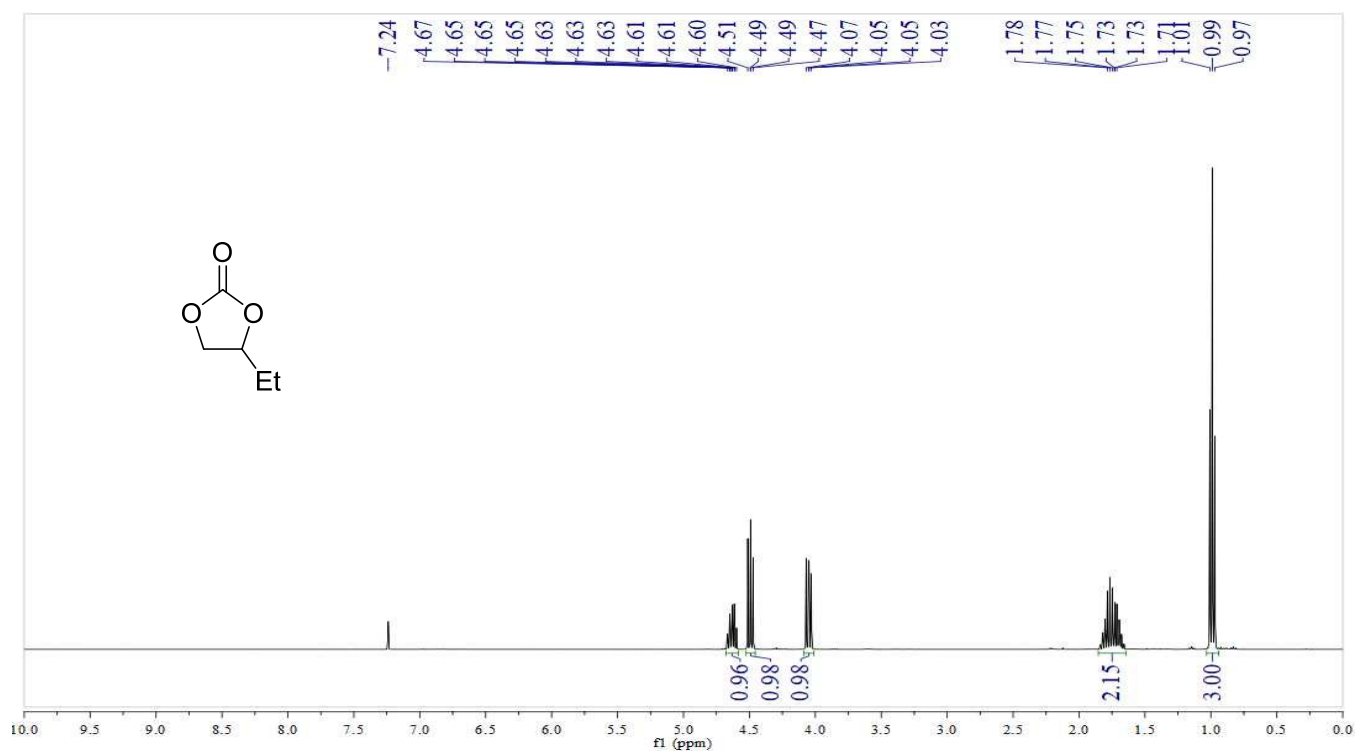

**Figure S54.** <sup>1</sup>H NMR spectrum of purified 4-ethyl-1,3-dioxolan-2-one(2c) in CDCl<sub>3</sub>.

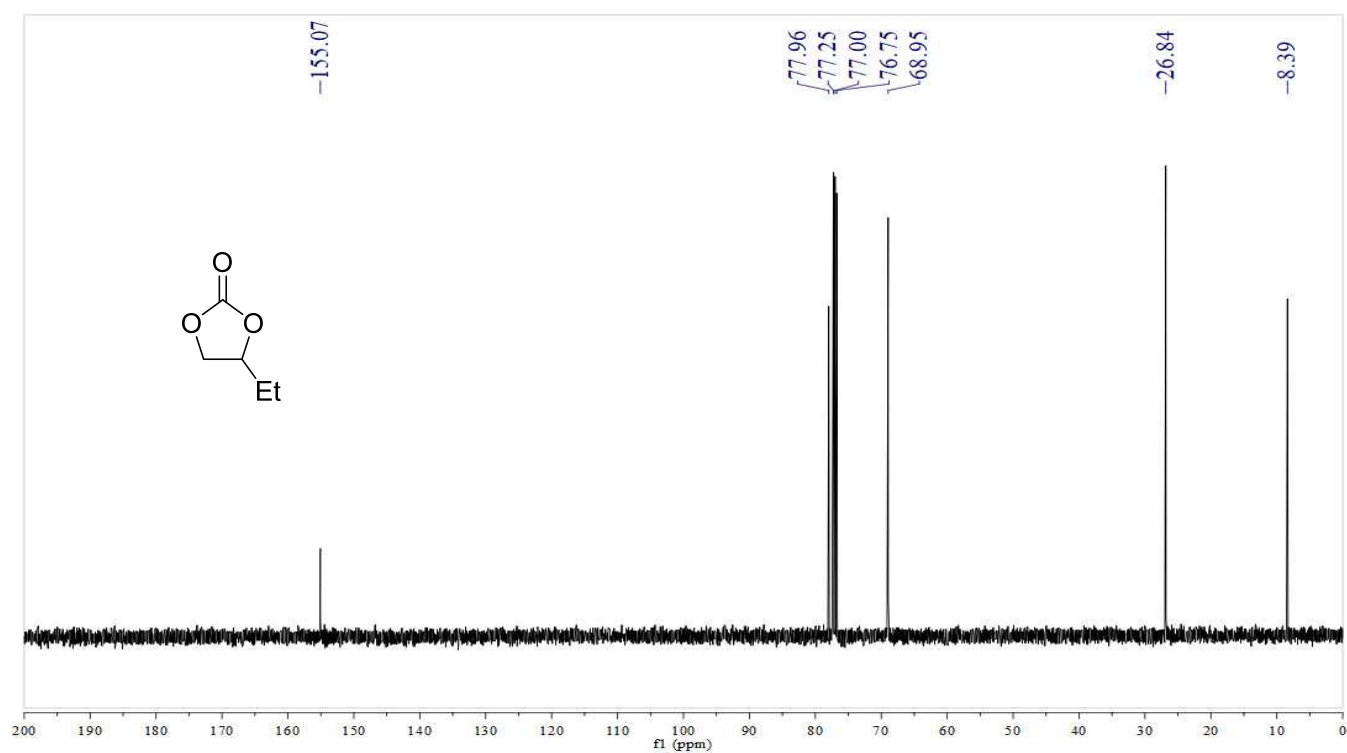

**Figure S55.** <sup>13</sup>C NMR spectrum of purified 4-ethyl-1,3-dioxolan-2-one(2c) in CDCl<sub>3</sub>.

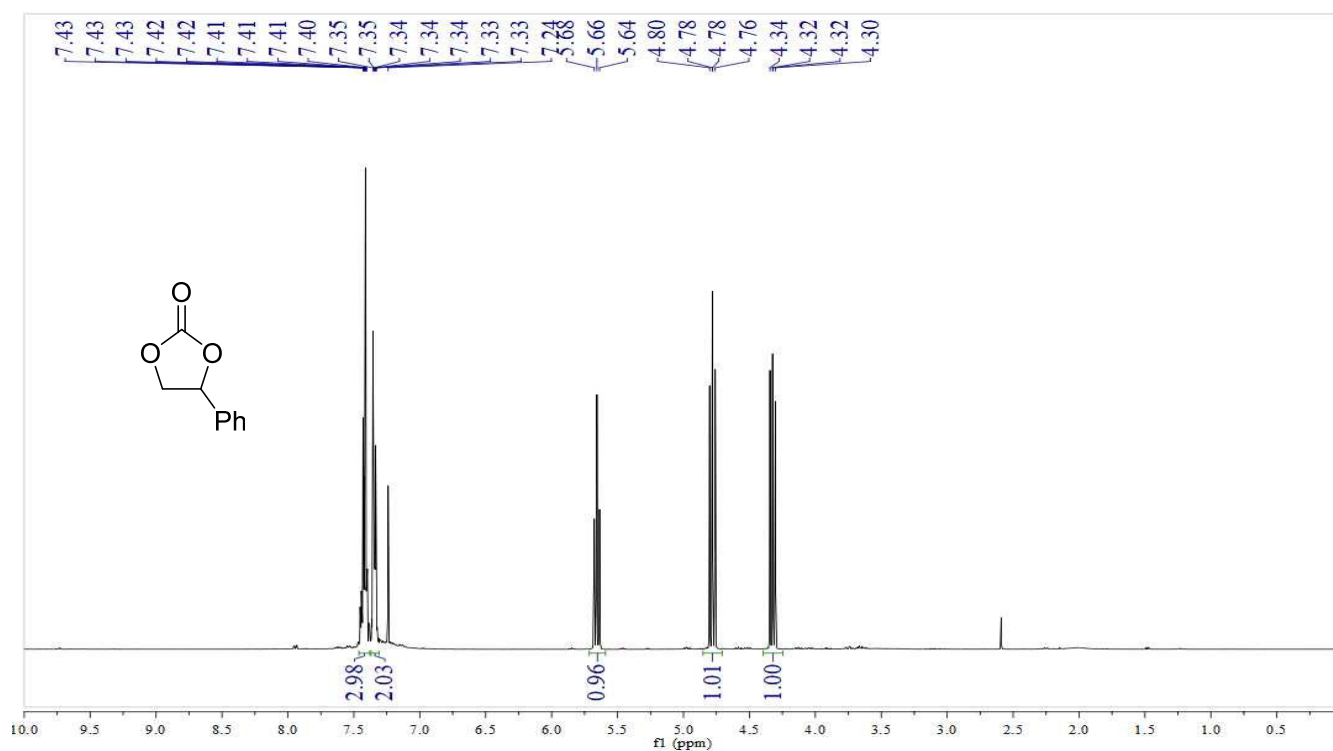

**Figure S56.** <sup>1</sup>H NMR spectrum of purified 4-phenyl-1,3-dioxolan-2-one(**2d**) in CDCl<sub>3</sub>.

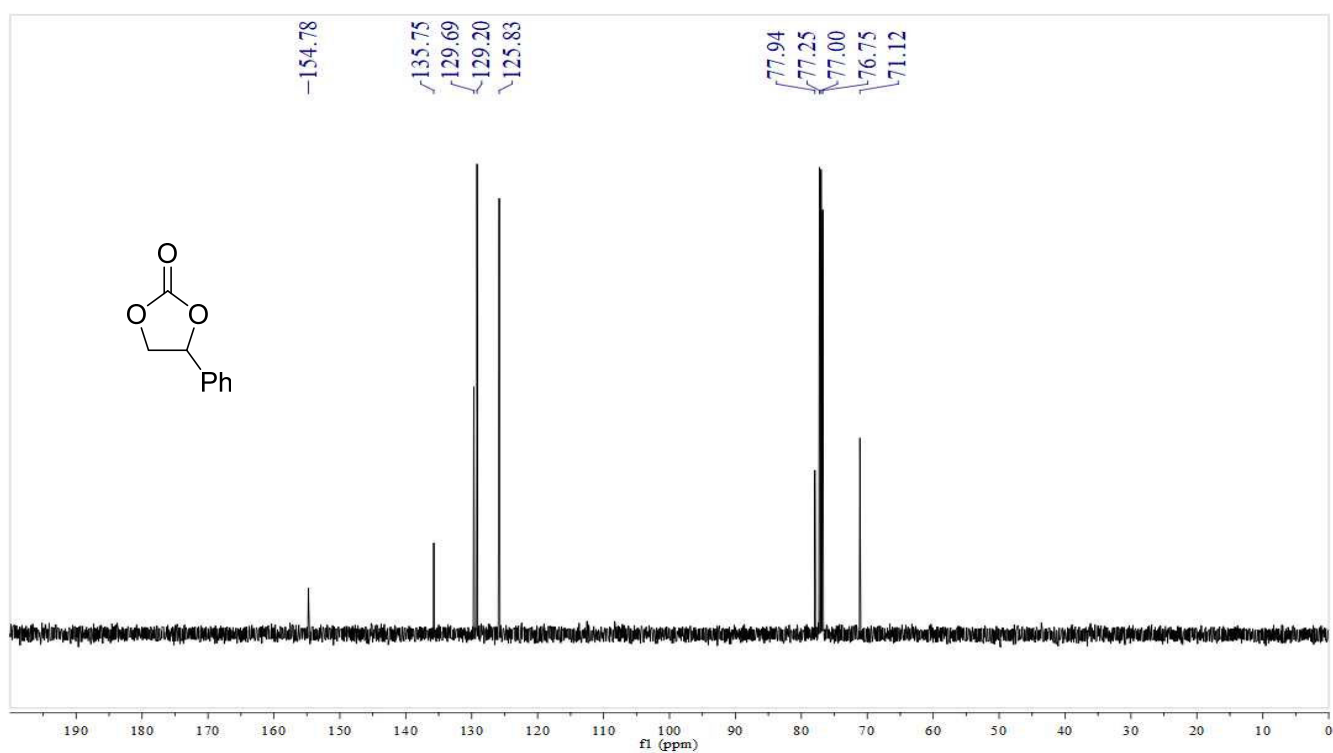

**Figure S57.** <sup>13</sup>C NMR spectrum of purified 4-phenyl-1,3-dioxolan-2-one(**2d**) in CDCl<sub>3</sub>.

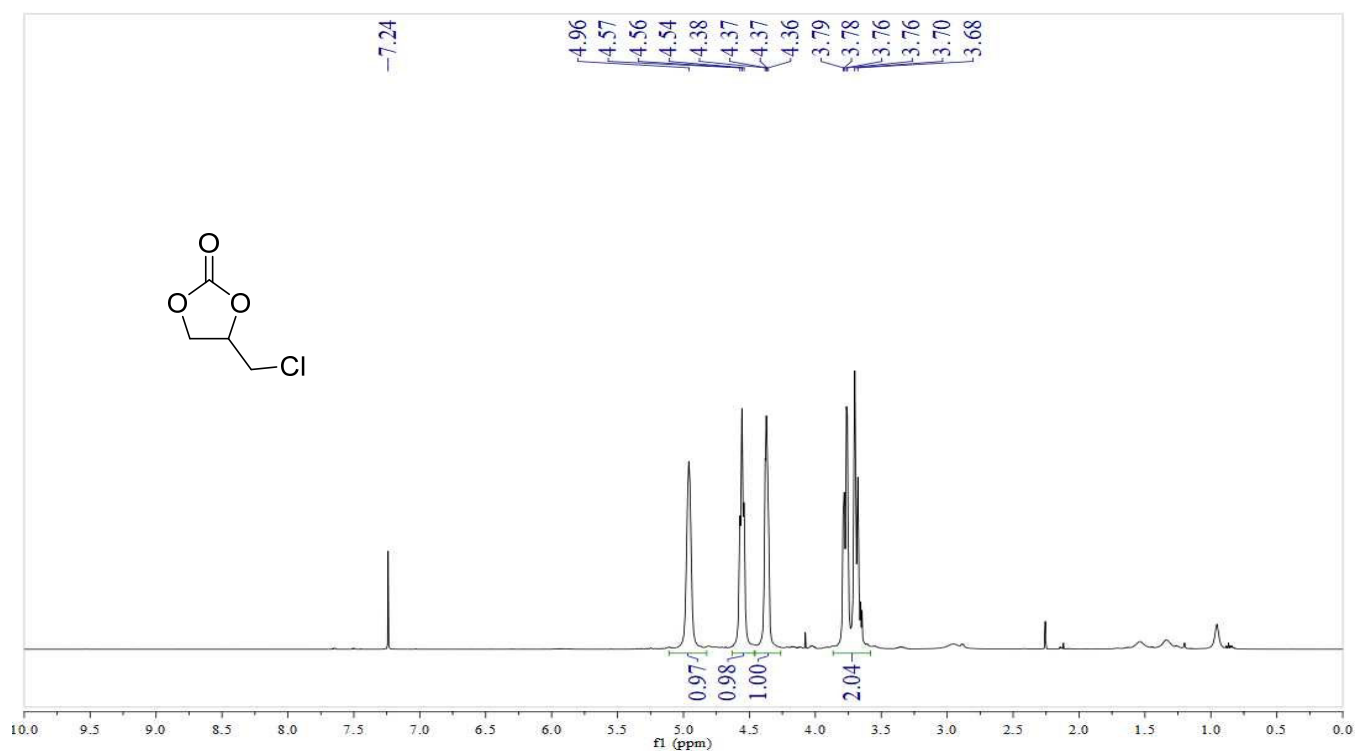

**Figure S58.** <sup>1</sup>H NMR spectrum of purified 4-(chloromethyl)-1,3-dioxolan-2-one(**2e**) in CDCl<sub>3</sub>.

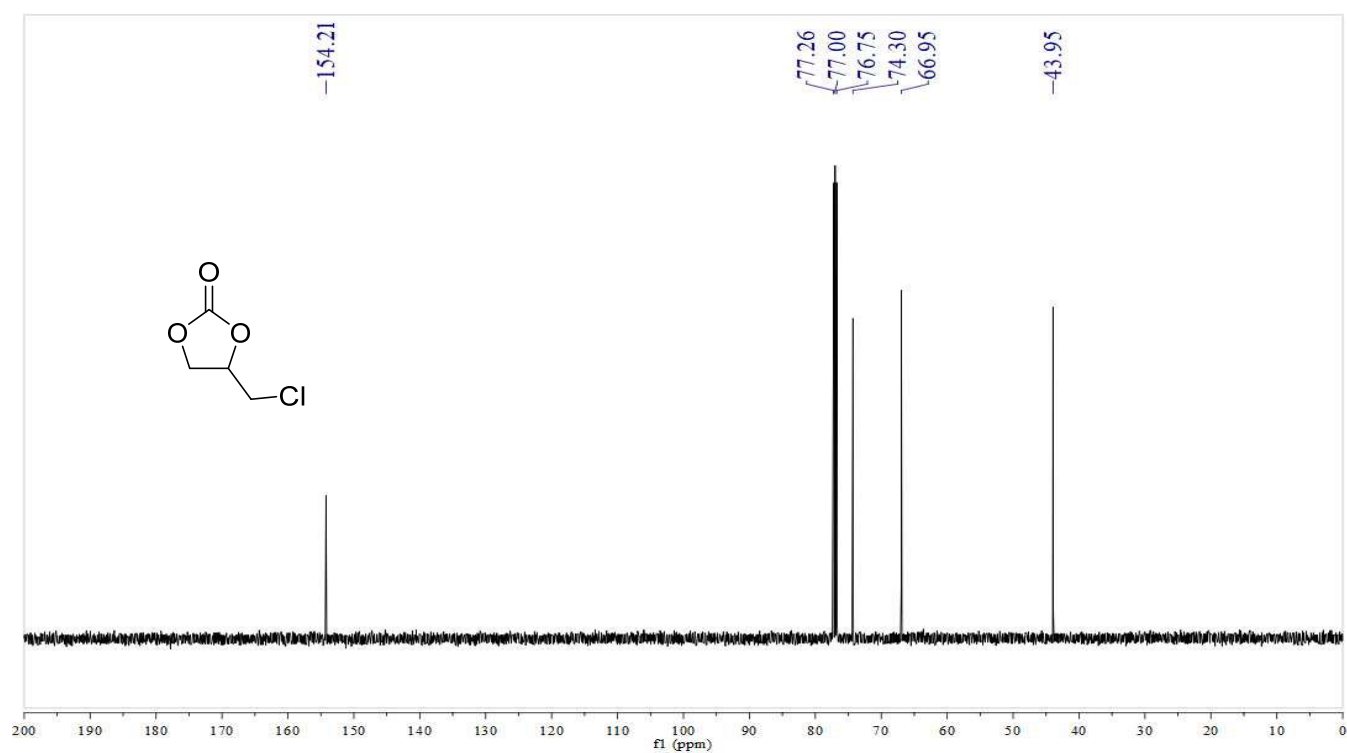

**Figure S59.** <sup>13</sup>C NMR spectrum of purified 4-(chloromethyl)-1,3-dioxolan-2-one(**2e**) in CDCl<sub>3</sub>.

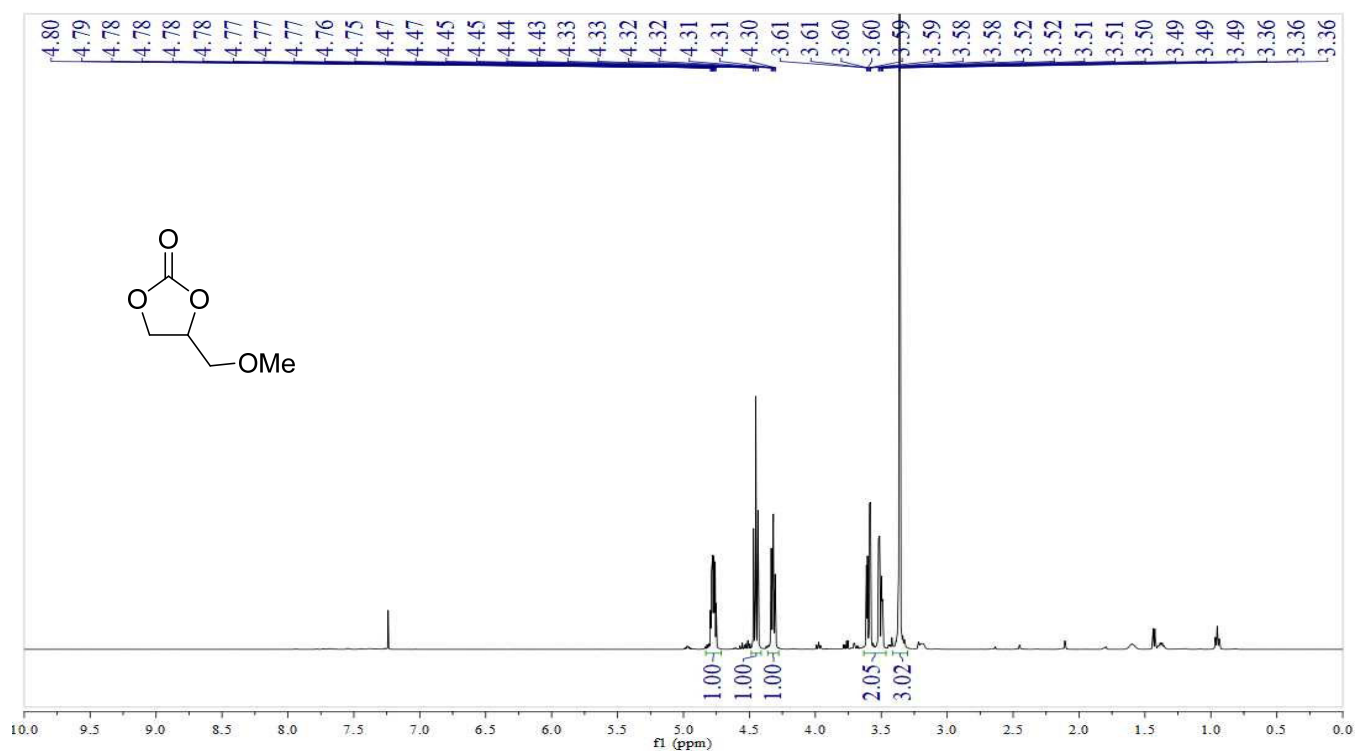

**Figure S60.** <sup>1</sup>H NMR spectrum of purified 4-(methoxymethyl)-1,3-dioxolan-2-one(**2f**) in CDCl<sub>3</sub>.

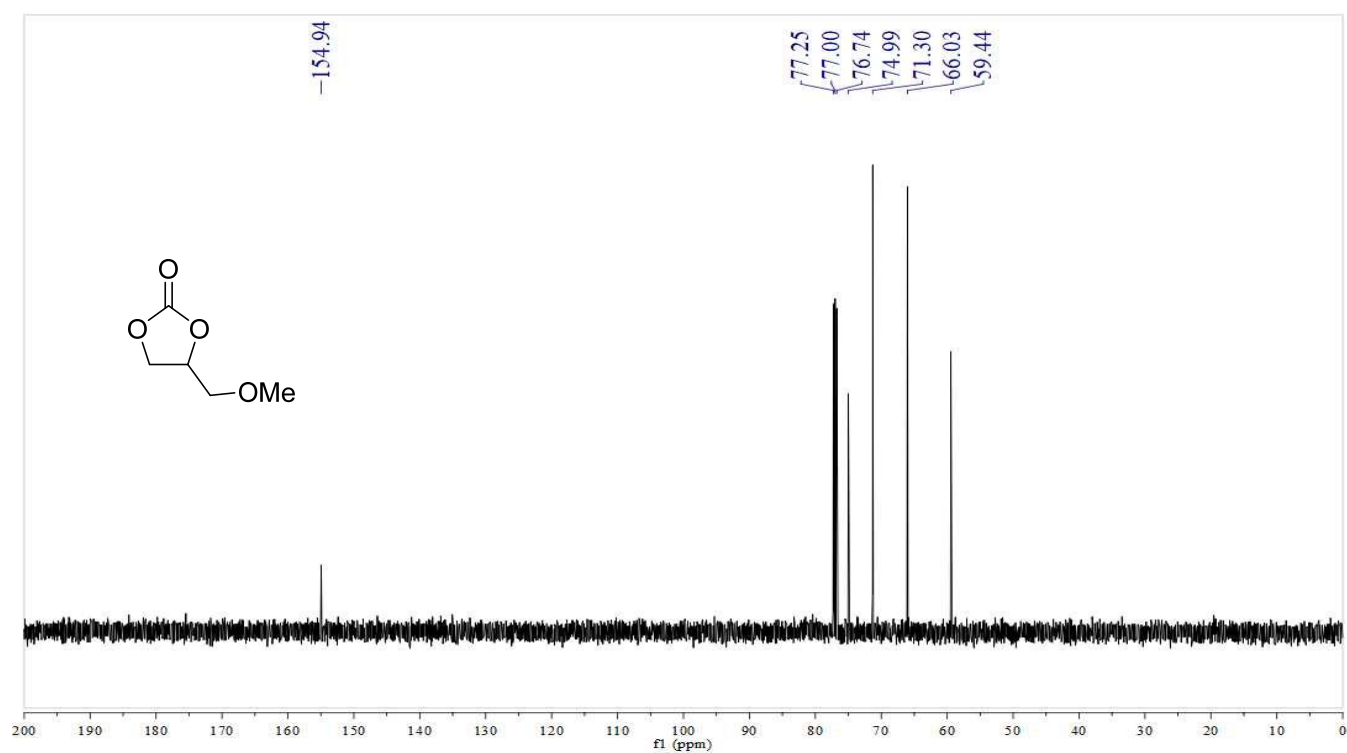

**Figure S61.** <sup>13</sup>C NMR spectrum of purified 4-(methoxymethyl)-1,3-dioxolan-2-one(**2f**) in CDCl<sub>3</sub>.

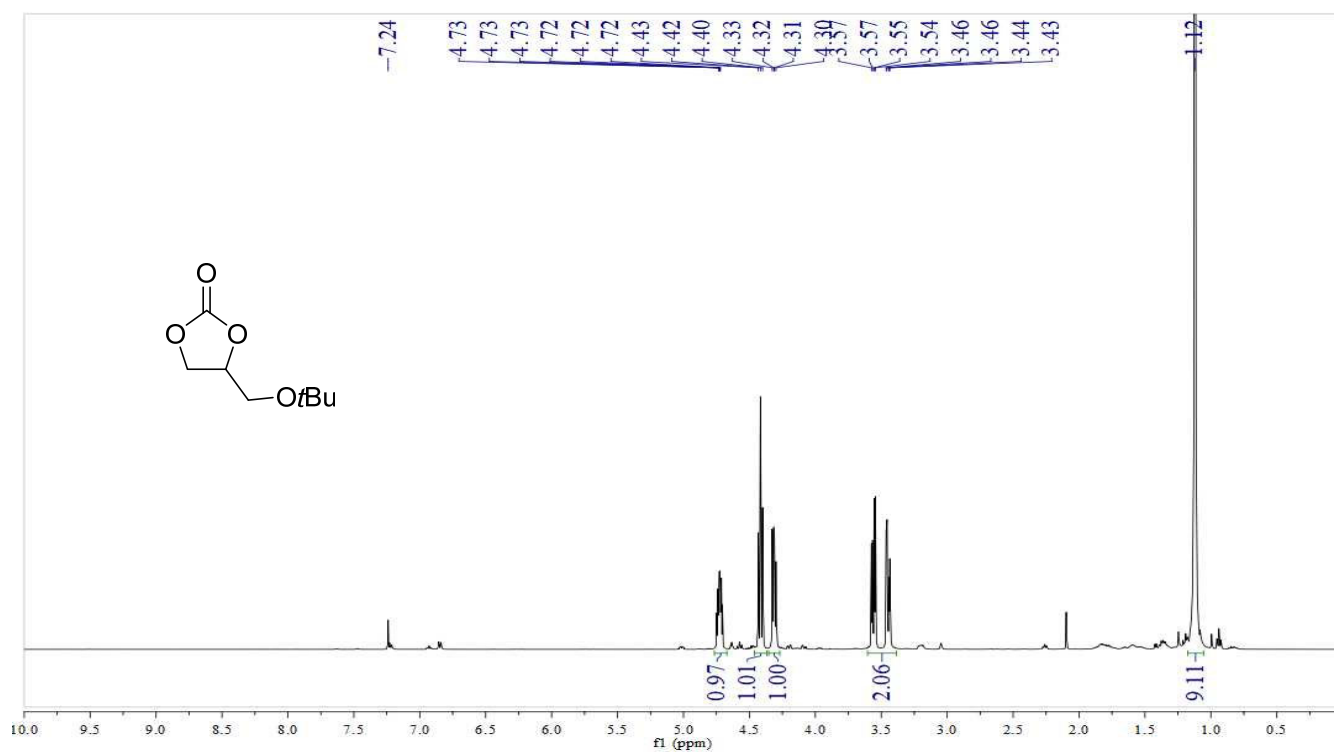

**Figure S62.** <sup>1</sup>H NMR spectrum of purified 4-[(1,1-dimethylethoxy)methyl]-1,3-dioxolan-2-one(**2g**) in CDCl<sub>3</sub>.

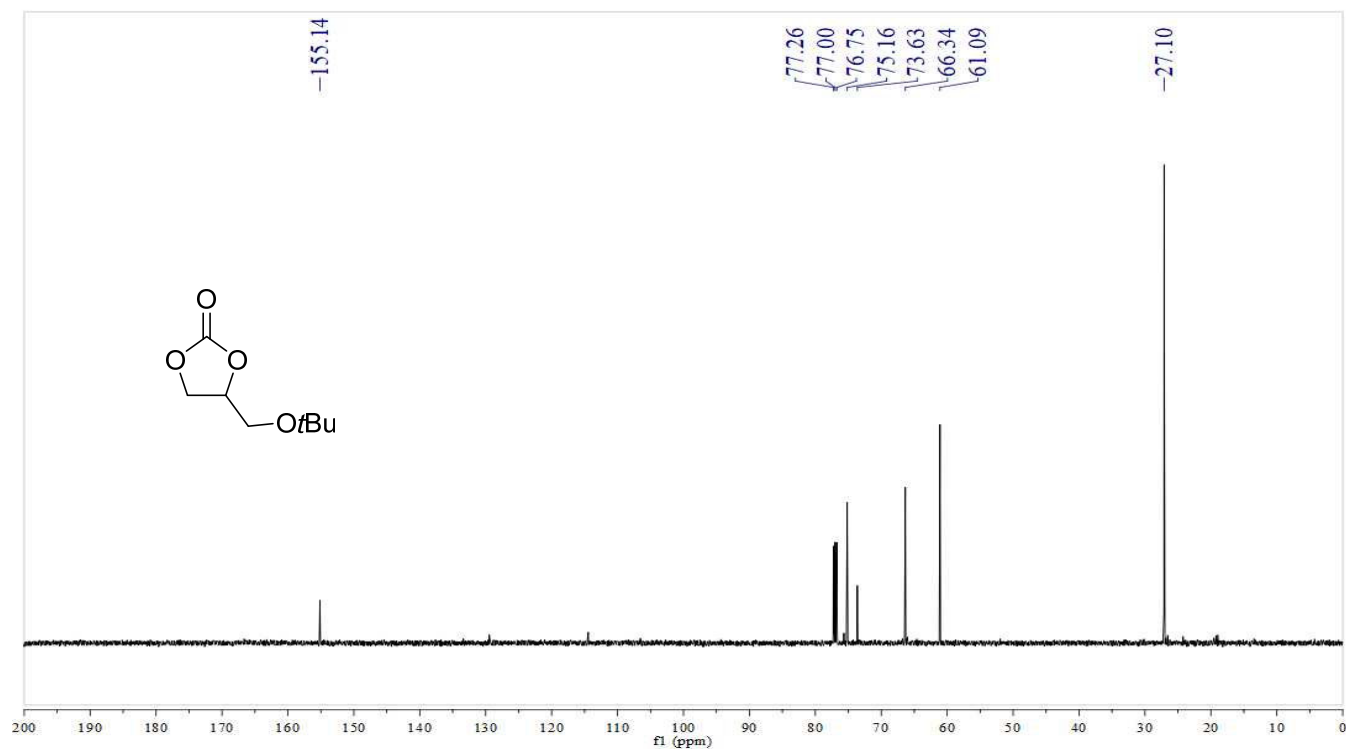

**Figure S63.** <sup>13</sup>C NMR spectrum of purified 4-[(1,1-dimethylethoxy)methyl]-1,3-dioxolan-2-one(**2g**) in CDCl<sub>3</sub>.

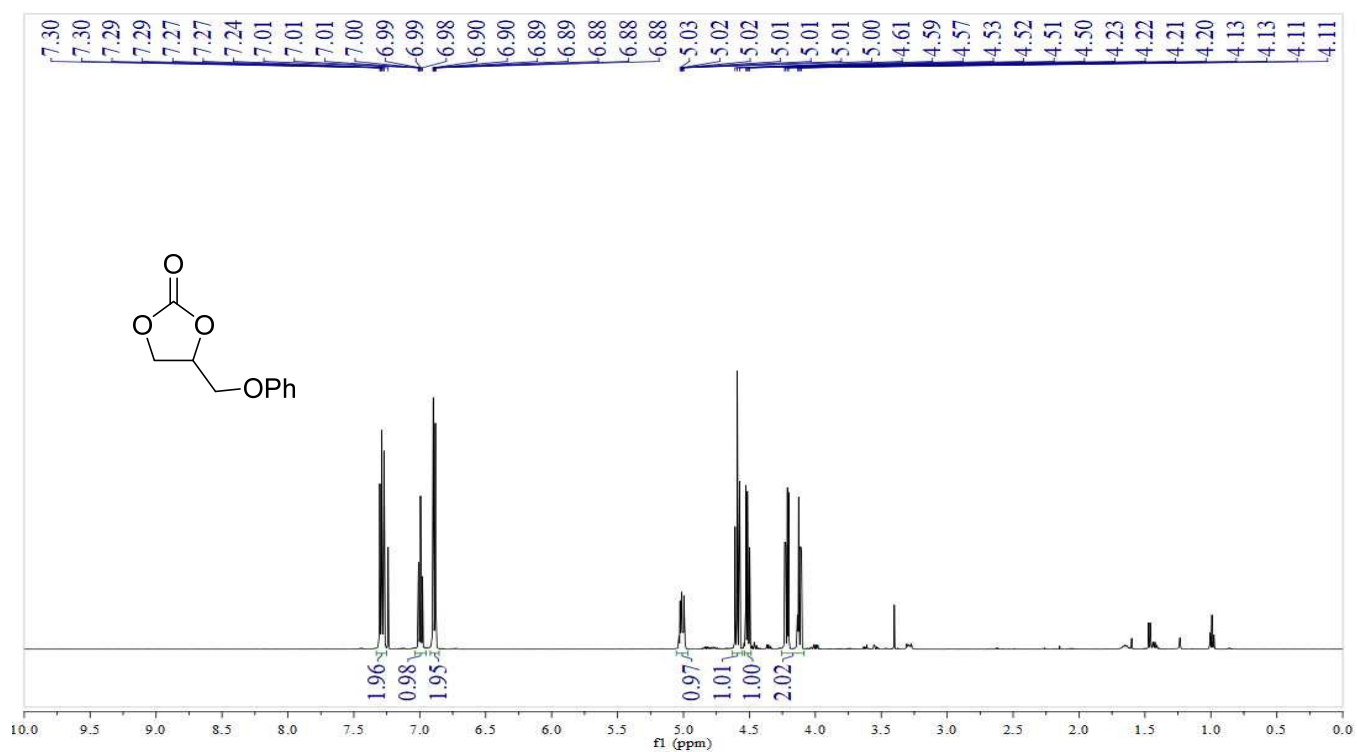

**Figure S64.** <sup>1</sup>H NMR spectrum of purified 4-(phoxymethyl)-1,3-dioxolan-2-one(**2h**) in CDCl<sub>3</sub>.

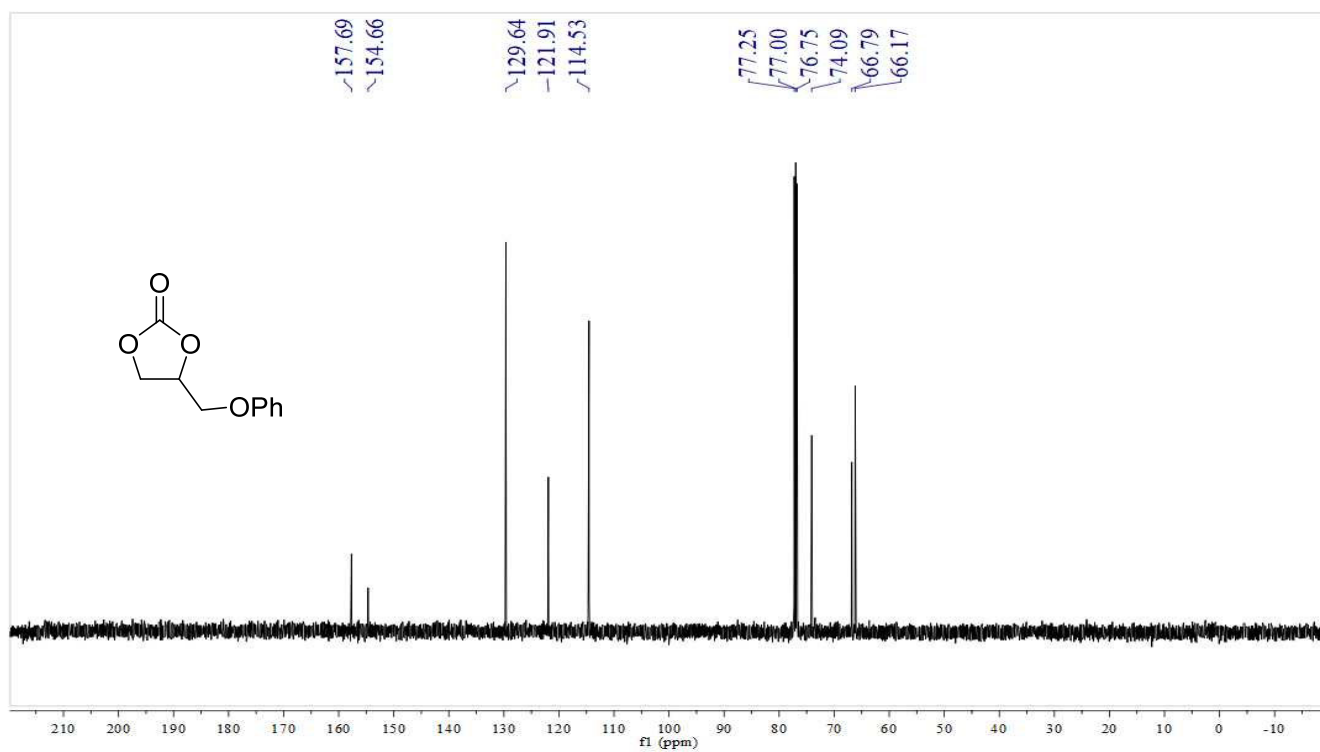

**Figure S65.** <sup>13</sup>C NMR spectrum of purified 4-(phoxymethyl)-1,3-dioxolan-2-one(**2h**) in CDCl<sub>3</sub>.



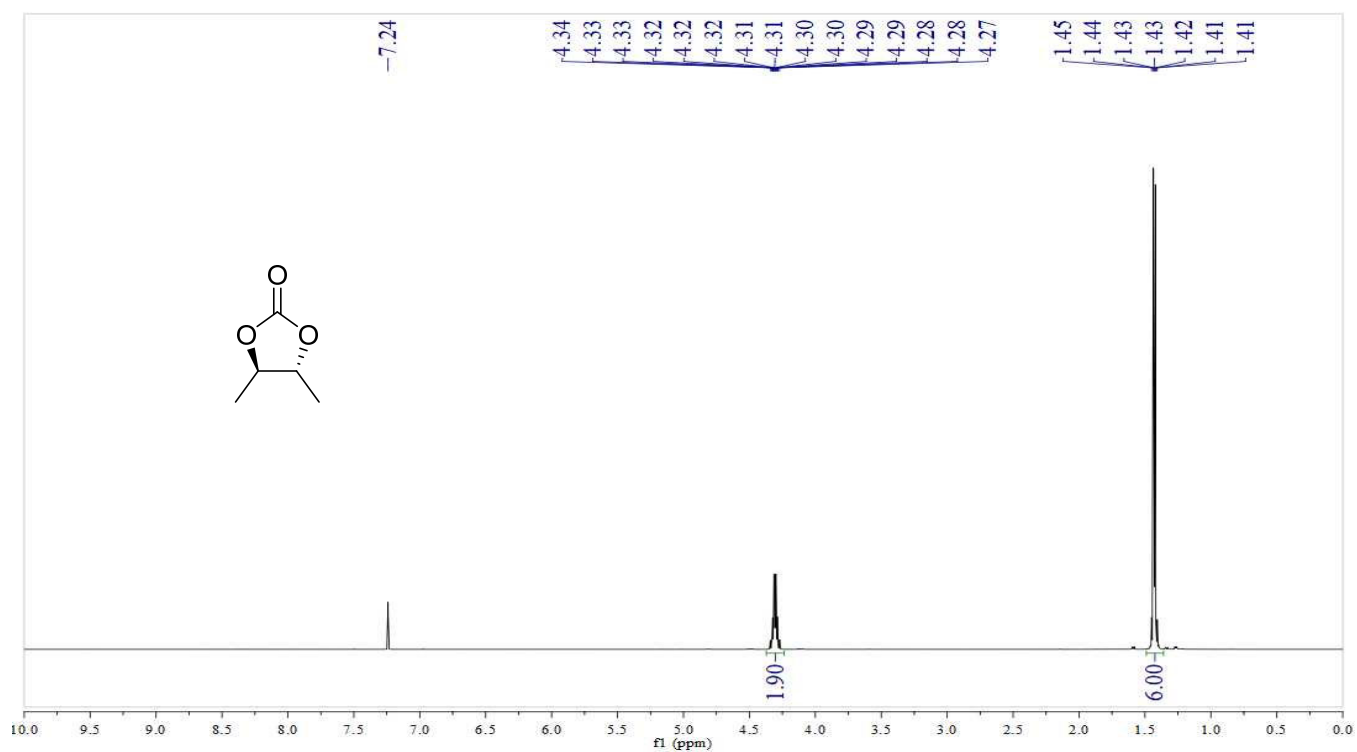

**Figure S66.** <sup>1</sup>H NMR spectrum of purified *trans*-4,5-dimethyl-1,3-dioxolan-2-one(*trans*-**2i**) in CDCl<sub>3</sub>.

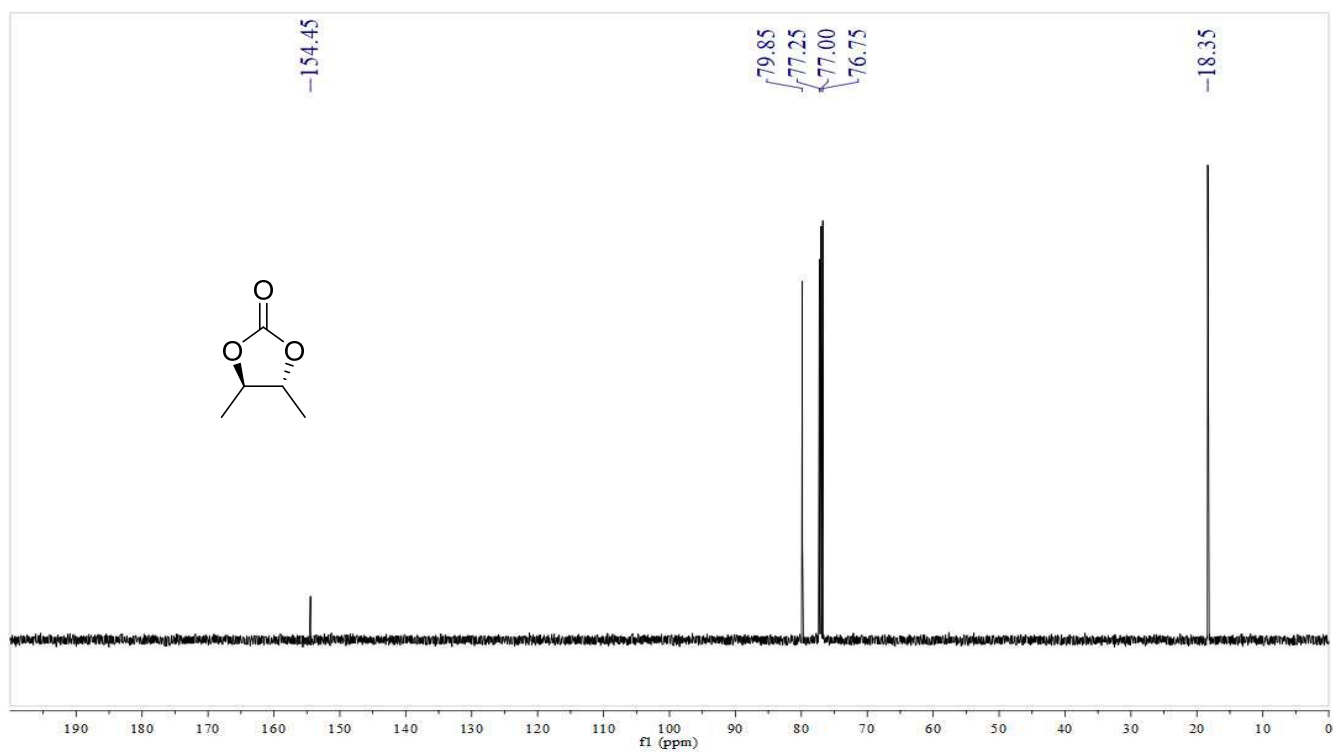

**Figure S67.** <sup>13</sup>C NMR spectrum of purified *trans*-4,5-dimethyl-1,3-dioxolan-2-one(*trans*-**2i**) in CDCl<sub>3</sub>.

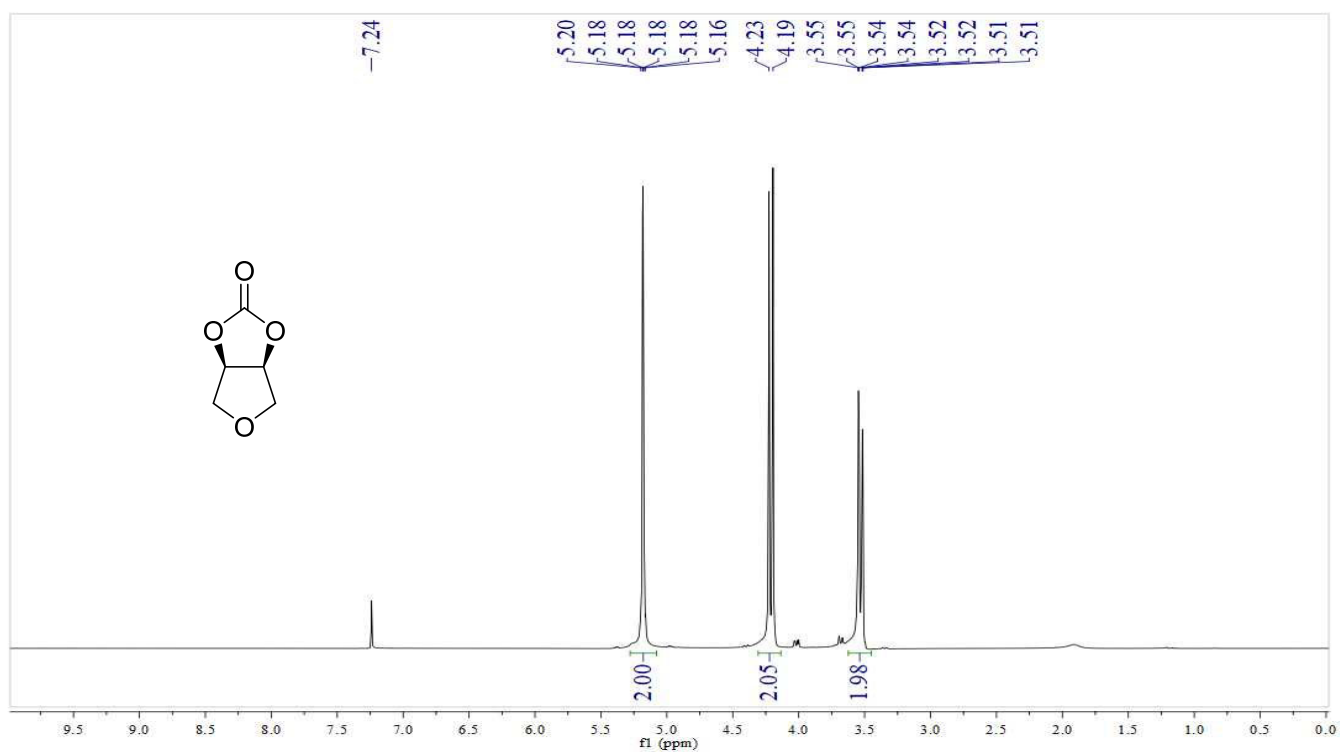

**Figure S68.** <sup>1</sup>H NMR spectrum of purified *cis*-tetrahydrofuro[3,4-*d*][1,3]dioxol-2-one (*cis*-**2j**) in CDCl<sub>3</sub>.

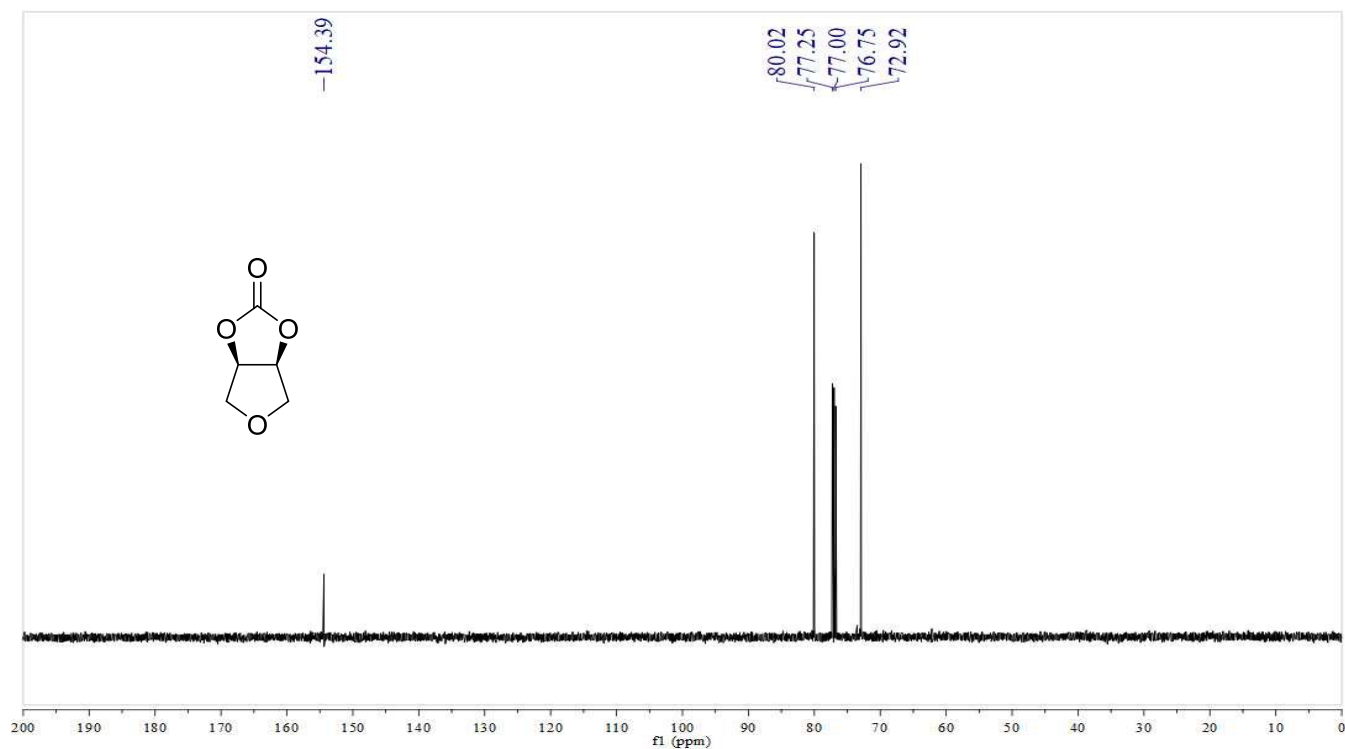

**Figure S69.** <sup>13</sup>C NMR spectrum of purified *cis*-tetrahydrofuro[3,4-*d*][1,3]dioxol-2-one (*cis*-**2j**) in CDCl<sub>3</sub>.

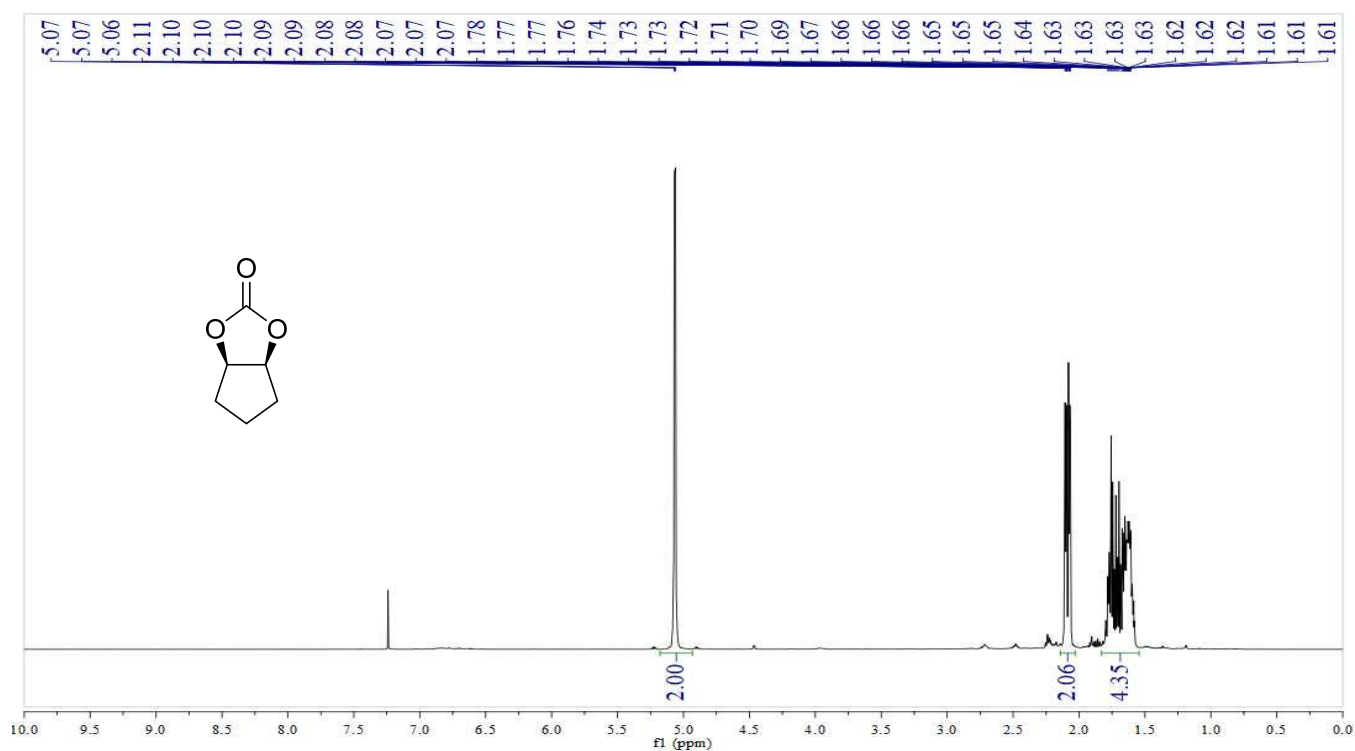

**Figure S70.** <sup>1</sup>H NMR spectrum of purified *cis*-tetrahydro-4*H*-cyclopenta[*d*][1,3]dioxol-2-one (*cis*-2k) in CDCl<sub>3</sub>.

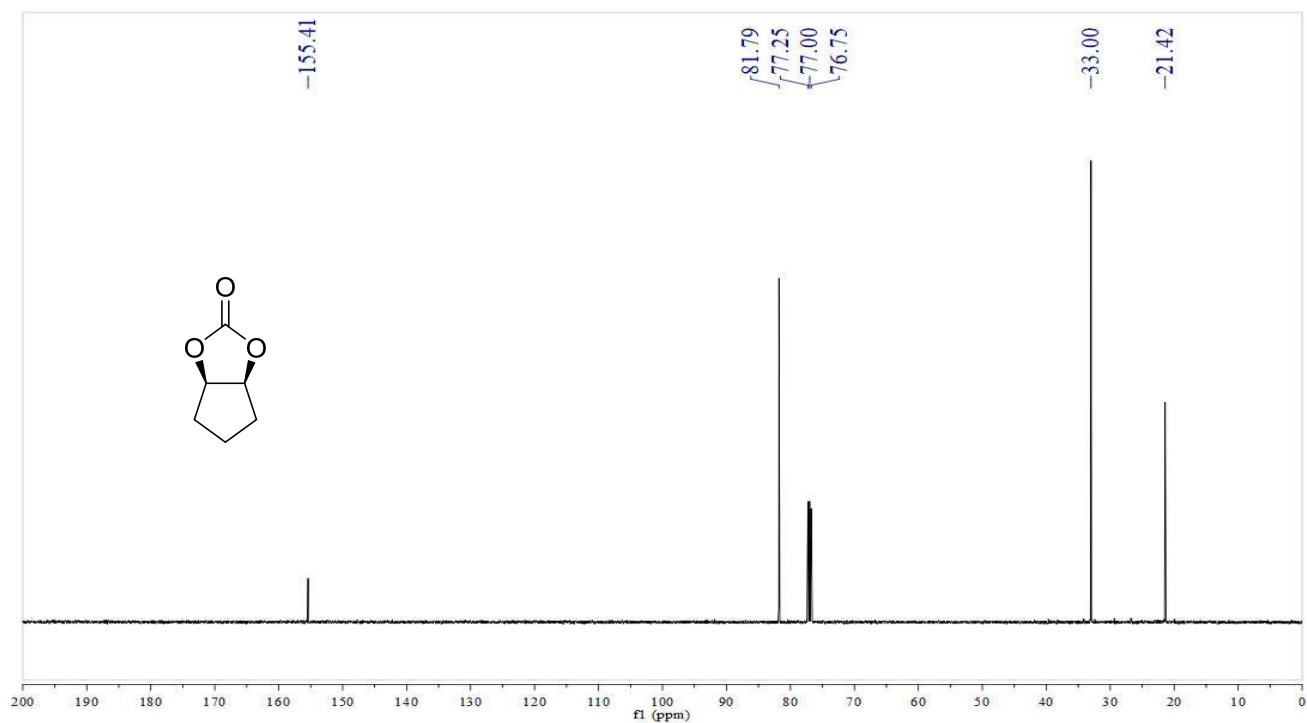

**Figure S71.** <sup>13</sup>C NMR spectrum of purified *cis*-tetrahydro-4*H*-cyclopenta[*d*][1,3]dioxol-2-one (*cis*-2k) in CDCl<sub>3</sub>.

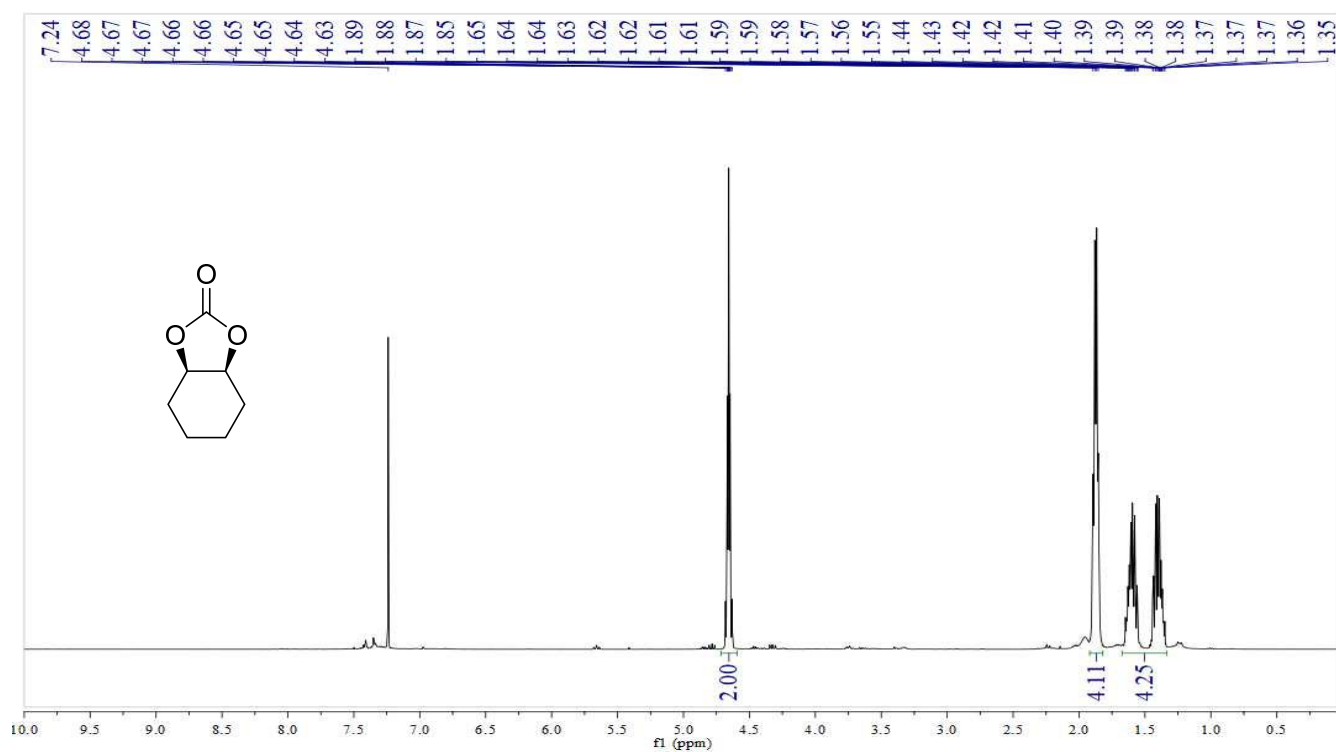

**Figure S72.** <sup>1</sup>H NMR spectrum of purified *cis*-hexahydrobenzo[*d*][1,3]dioxol-2-one (*cis*-**21**) in CDCl<sub>3</sub>.

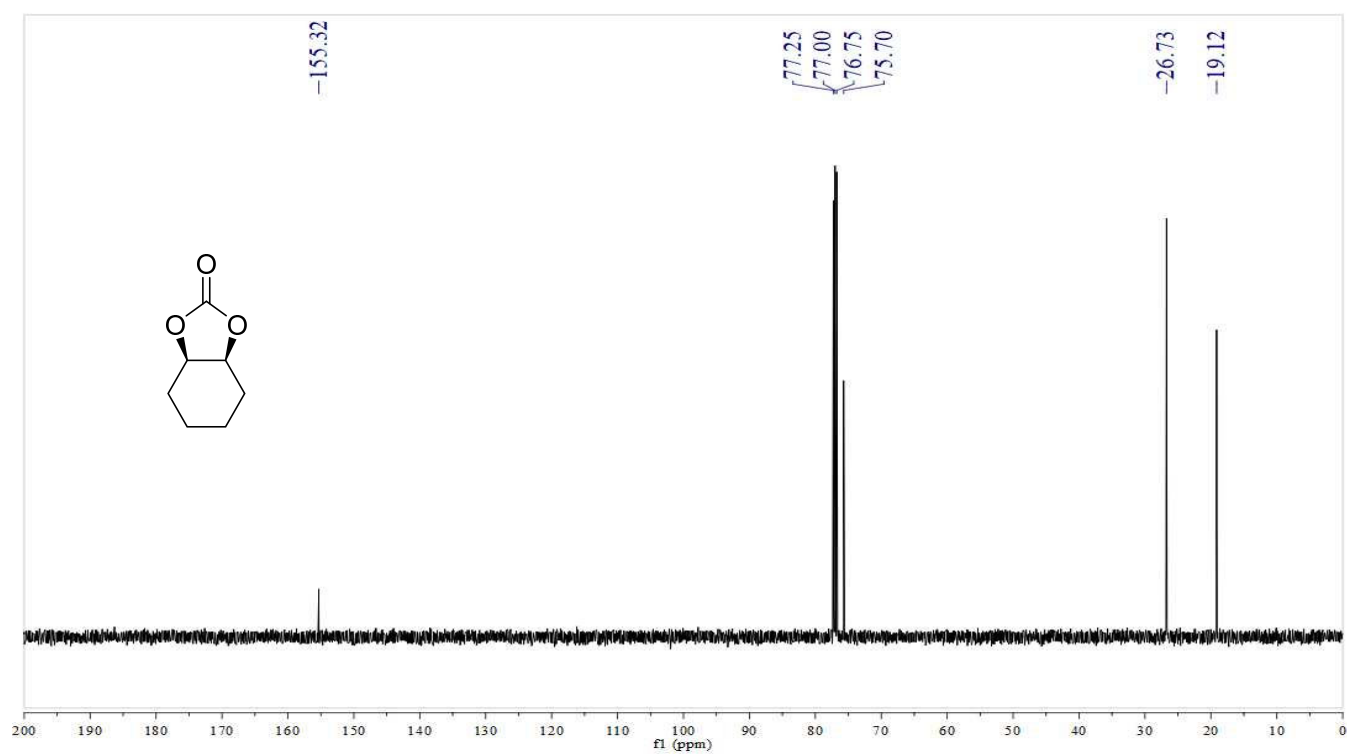

**Figure S73.** <sup>13</sup>C NMR spectrum of purified *cis*-hexahydrobenzo[*d*][1,3]dioxol-2-one (*cis*-**21**) in CDCl<sub>3</sub>.
